# Supplementary material for: Microwave-assisted synthesis and functionalization of 2-arylimidazo[1,2-a]pyrimidin-5(8H)-ones
Source: Royal Society of Chemistry journal article supplement (doi:10.1039/d4ra03948c), 2024-01-01
Supplement: d4ra03948c1.pdf [file d4ra03948c1.pdf]

## Electronic supplementary information (ESI)

### Microwave-assisted synthesis and functionalization of 2-arylimidazo[1,2-*a*]pyrimidin-5(8*H*)-ones

Delascar Camargo,<sup>a</sup> Carlos Cifuentes,<sup>a</sup> Juan-Carlos Castillo,<sup>a,b</sup> and Jaime Portilla\*<sup>a</sup>

<sup>a</sup> Bioorganic Compounds Research Group, Department of Chemistry, Universidad de Los Andes, Carrera 1 No. 18A-10, Bogotá 111711, Colombia

<sup>b</sup> Escuela de Ciencias Químicas, Universidad Pedagógica y Tecnológica de Colombia, Avenida Central del Norte 39-115, Tunja, Colombia

\*E-mail: jportill@uniandes.edu.co; Tel: +57 1 3394949. Ext. 2080

## Contents

|                                                       |     |
|-------------------------------------------------------|-----|
| 1. Overview of substrates and products numbering..... | S2  |
| 2. Experimental details.....                          | S3  |
| 3. Copies of NMR spectra.....                         | S12 |
| 4. Photophysical and crystallographic details.....    | S41 |
| 5. References.....                                    | S41 |

## 1. Overview of substrates and products numbering

(a) **Substrates/reagents.** 6-methylisocytosine (**3**), acetophenones **7a-e**, alkyl bromides **5a-c**, bromine, and  $\alpha$ -bromoacetophenones **2a-e**.

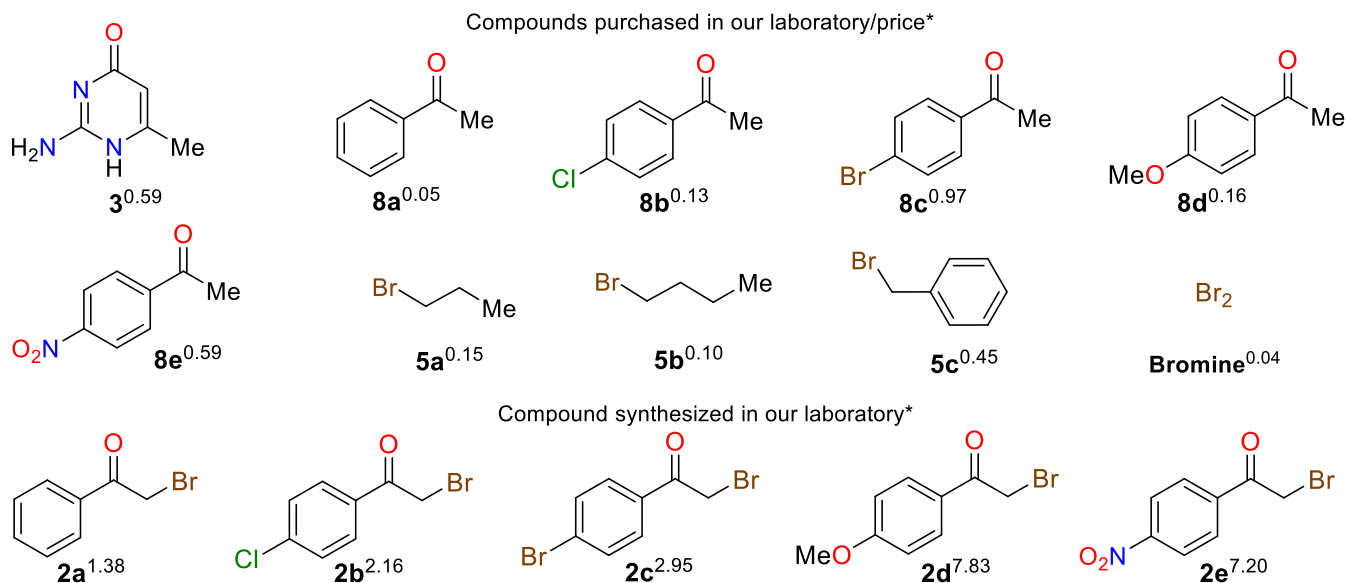

\*Approximate prices in USD per gram or millilitre were consulted via MERCK or Fisher Scientific, on May 9 2024. From presentations for 0.1 to 1 Kg or 25g for **2a-e**.

(b) **2-Aryl-7-methylimidazo[1,2-a]pyrimidin-5(8H)-ones 4a-e**

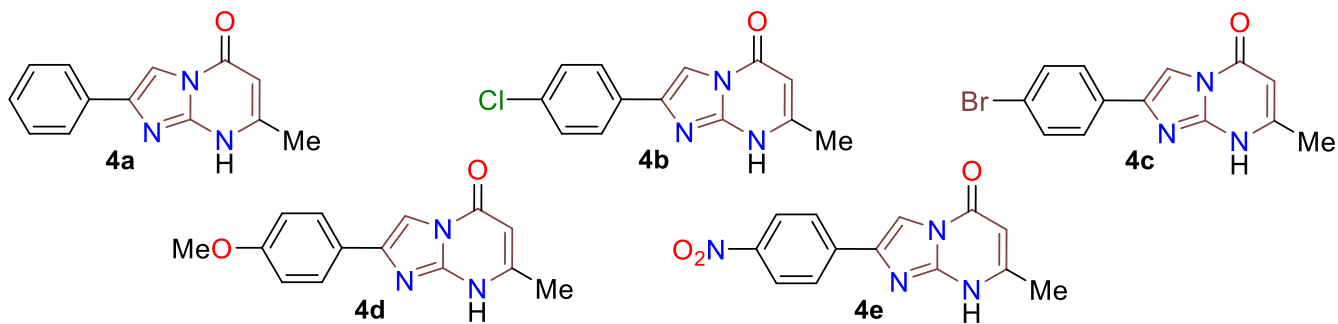

(c) **2-Aryl-3,6-dibromo-7-methyl-8-propylimidazo[1,5-a]pyrimidones 6a-e**

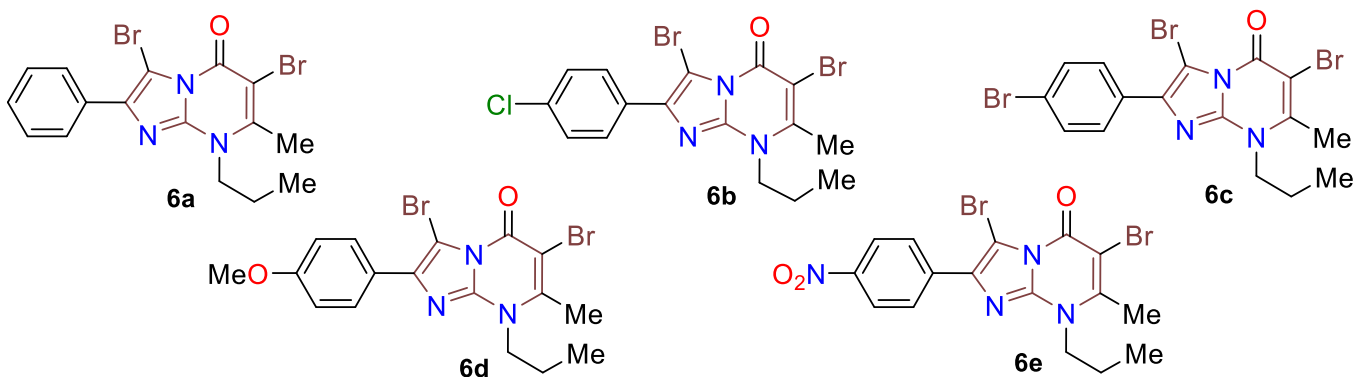

**Fig. S1** Structures of (a) commercial (top) and synthetics (bottom) substrate/reagents, (b) 2-aryl-7-methylimidazo[1,5-a]pyrimidones **4a-e**, and (c) 2-aryl-3,6-dibromo-7-methyl-8-propylimidazo[1,5-a]pyrimidones **6a-e**

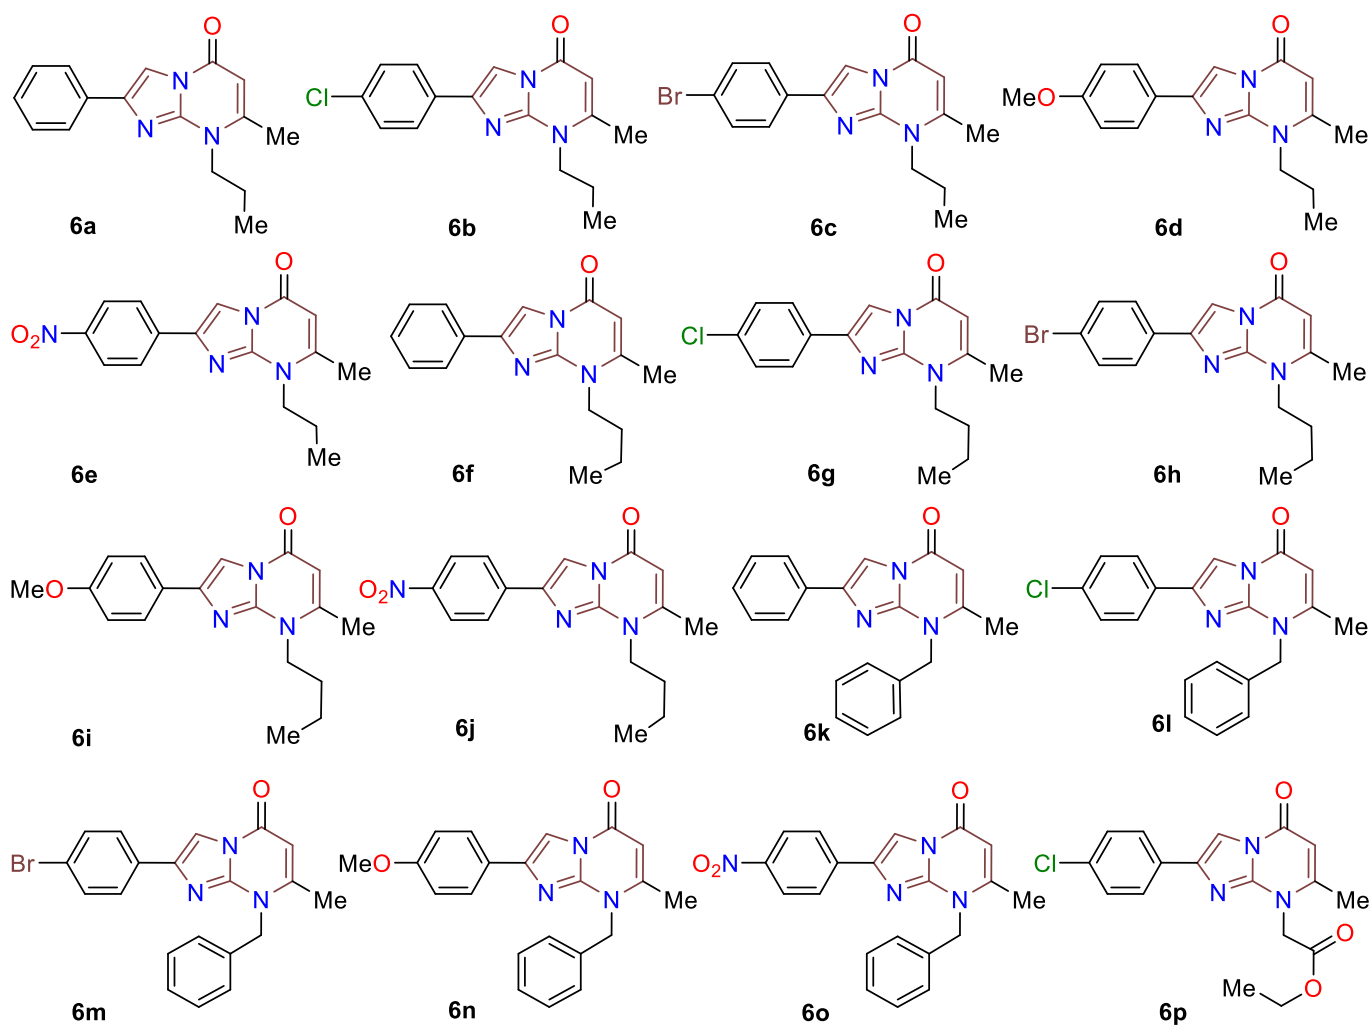

Fig. S2 Structure of N-alkylated 2-aryl-7-methylimidazo[1,5-*a*]pyrimidones 6a-p

## 2. Experimental details

### 2.1. Reagents and materials

Reagents were acquired from commercial sources, used without further purification, and weighed and handled in air at room temperature (r.t.). Reactions were monitored by thin-layer chromatography (TLC) and visualized by a UV lamp (254/365 nm). Silica gel (230-400 mesh) for flash chromatography was used. Reactions under MW irradiation were carried out in a sealed reaction vessel (10.0 mL, max pressure = 300 psi) containing a Teflon-coated stir bar (obtained from CEM) and were performed in a CEM Discover SP-focused MW ( $\nu = 2.45$  GHz) reactor equipped with a built-in pressure measurement sensor and a vertically focused IR temperature sensor. Controlled temperature, power, and time settings were used.

NMR spectra were recorded at 400 MHz ( $^1\text{H}$ ) and 101 MHz ( $^{13}\text{C}$ ) at 298 K, and data were recorded in  $\text{CDCl}_3$  (7.26/77.0 ppm) or DMSO (2.50/39.5 ppm) using the residual nondeuterated signal for  $^1\text{H}$  and the deuterated solvent signal for  $^{13}\text{C}$  NMR as internal standards. Chemical shifts ( $\delta$ ) are given in parts per million (ppm) and coupling constants ( $J$ ) in Hertz (Hz). The multiplicity abbreviations involve s = singlet, d = doublet, t = triplet, q = quartet, and m = multiplet. Melting points were measured by a capillary melting point device, and data were uncorrected. High-resolution mass spectra (HRMS) were recorded by a Q-TOF spectrometer using electrospray ionization (ESI). Crystallographic data were recorded on a diffractometer using graphite-monochromated Mo K $\alpha$  radiation ( $\lambda = 0.71073 \text{ \AA}$ ). Structures were solved by direct methods in SHELXS-97.<sup>1</sup>

## 2.2. General procedure and characterization data

### 2.2.1. Synthesis of $\alpha$ -bromoacetophenones **2a-e**.

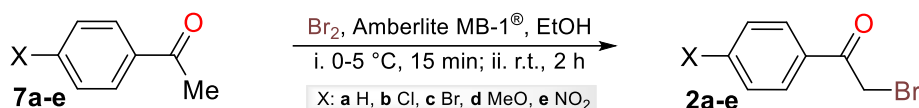

To a mixture of acetophenone **7a-e** (5.00 mmol) and Amberlite MB-1<sup>®</sup> (500 mg) in ethanol (10 mL) cooled by an ice bath, bromine (5.5 mmol to 99.5%, 883 mg) was added slowly, and it stirred first for 15 min and then more time at room temperature. After the completion of the reaction in around 2 h (monitored by TLC), it was filtered off and washed with ethanol (2  $\times$  2.5 mL). Then, water was added (5 mL) to the filtered solution, and the mixture was extracted with DCM (3  $\times$  30 mL). The organic phase was dried over anhydrous  $\text{MgSO}_4$  and concentrated under vacuum giving **2a-d** as white solids, **2e** is a yellow solid. NMR data for **2a-e** matched the reported data in the literature.<sup>2,3</sup>

**2-Bromoacetophenone (2a)**: 965 mg (97%), mp: 49–50  $^\circ\text{C}$  (Lit.<sup>2</sup> 43–45  $^\circ\text{C}$ ).  $^1\text{H}$  NMR (400 MHz,  $\text{CDCl}_3$ ):  $\delta = 4.46$  (s, 2H), 7.50 (t,  $J = 7.6$  Hz, 2H), 7.61 (t,  $J = 7.6$  Hz, 1H), 7.99 (d,  $J = 8.4$  Hz, 2H) ppm.

**2-Bromo-4'-chloroacetophenone (2b)**: 1167 mg (quantitative), mp: 96–97  $^\circ\text{C}$  (Lit.<sup>2</sup> 96–98  $^\circ\text{C}$ ).  $^1\text{H}$  NMR (400 MHz,  $\text{CDCl}_3$ ):  $\delta = 4.41$  (s, 2H), 7.49 (d,  $J = 8.6$  Hz, 2H), 7.94 (d,  $J = 8.6$  Hz, 2H) ppm.

**2,4'-Dibromoacetophenone (2c)**: 1.39 g (quantitative), Mp: 107–108  $^\circ\text{C}$  (Lit.<sup>4</sup> 106–108  $^\circ\text{C}$ ).  $^1\text{H}$  NMR (400 MHz,  $\text{CDCl}_3$ ):  $\delta = 4.46$  (s, 2H), 7.64 (d,  $J = 8.7$  Hz, 2H), 7.86 (d,  $J = 8.7$  Hz, 2H) ppm.

**2-Bromo-4'-methoxyacetophenone (2d)**: 955 mg (96%), Mp: 70–71  $^\circ\text{C}$  (Lit.<sup>2</sup> 70–72  $^\circ\text{C}$ ).  $^1\text{H}$  NMR (400 MHz,  $\text{CDCl}_3$ ):  $\delta = 4.40$  (s, 2H), 6.65 (d,  $J = 8.8$  Hz, 2H), 7.86 (d,  $J = 8.8$  Hz, 2H) ppm.

**2-Bromo-4'-nitroacetophenone (2e)**: 1.22 g (quantitative), Mp: 90–91  $^\circ\text{C}$  (Lit.<sup>4</sup> 91–93  $^\circ\text{C}$ ).  $^1\text{H}$  NMR (400 MHz, DMSO):  $\delta = 4.50$  (s, 2H), 7.91 (t,  $J = 8.2$  Hz, 2H), 8.21 (t,  $J = 8.1$  Hz, 2H) ppm.

### 2.2.2. Synthesis of 2-aryl-7-methylimidazo[1,2-a]pyrimidin-5(8H)-ones 4a-e.

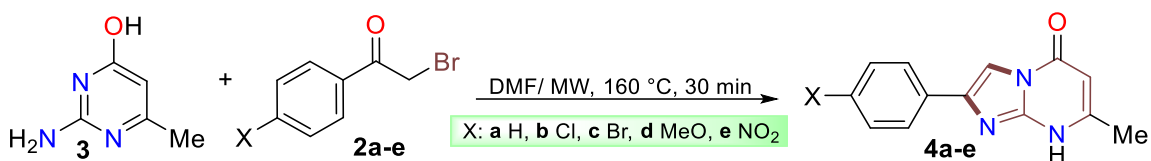

An equimolar mixture of 2-amino-4-hydroxy-6-methylpyrimidine (**3**, 1.0 mmol, 125 mg) and the appropriate  $\alpha$ -bromoketone **2a-e** in DMF (2.0 mL) was subjected to microwave irradiation at 160 °C (170 W programmed but ~20% of this was necessary and constant. Temperature monitored by an IR sensor) for 30 min in a sealed tube containing a Teflon-coated magnetic stirring bar. The resulting reaction mixture was cooled to 55 °C by airflow, and the precipitated product formed upon the addition of cold water (3.0 mL) was filtered, washed with cold ethanol (2  $\times$  2 mL), and dried under a high vacuum for one hour at 60 °C to give the pure products **4a-e** as yellowish-white solids. Compounds **4a-e** were characterized by comparing their data with information available in the literature, *e.g.*, NMR data for **4a-e** matched previously reported data.<sup>5-7</sup>

**7-Methyl-2-phenylimidazo[1,2-a]pyrimidin-5(8H)-one (4a)** was obtained in 83% yield (187 mg) from 2-bromoacetophenone (**2a**, 198 mg, 1.00 mmol). Mp > 300 °C (amorphous, Lit.<sup>5</sup> 315–317 °C). <sup>1</sup>H NMR (400 MHz, DMSO-*d*<sub>6</sub>):  $\delta$  = 2.29 (s, 3H), 5.64 (s, 1H), 7.31 (t, *J* = 7.6 Hz, 1H), 7.42 (t, *J* = 7.7 Hz, 2H), 7.90 (d, *J* = 7.7 Hz, 2H), 8.05 (s, 1H), 12.85 (br s, 1H) ppm. <sup>13</sup>C{<sup>1</sup>H} NMR (101 MHz, DMSO-*d*<sub>6</sub>):  $\delta$  = 19.8 (CH<sub>3</sub>), 95.2 (CH), 103.5 (CH), 125.2 (CH), 127.8 (CH), 128.6 (CH), 132.1 (C), 137.9 (C), 144.1 (C), 153.5 (C), 157.0 (C) ppm.

**2-(4-Chlorophenyl)-7-methylimidazo[1,2-a]pyrimidin-5(8H)-one (4b)** was obtained in 80% yield (208 mg) from 2-bromo-4'-chloroacetophenone (**2b**, 236 mg, 1.01 mmol). Mp > 300 °C (amorphous, Lit.<sup>6</sup> > 300 °C) [2]. <sup>1</sup>H NMR (400 MHz, DMSO-*d*<sub>6</sub>):  $\delta$  = 2.29 (s, 3H), 5.63 (s, 1H), 7.45 (d, *J* = 8.6 Hz, 2H), 7.91 (d, *J* = 8.6 Hz, 2H), 8.10 (s, 1H), 12.82 (br s, 1H) ppm. <sup>13</sup>C{<sup>1</sup>H} NMR (101 MHz, DMSO-*d*<sub>6</sub>):  $\delta$  = 19.3 (CH<sub>3</sub>), 95.0 (CH), 104.2 (CH), 126.8 (CH), 128.6 (CH), 131.6 (C), 132.1 (C), 137.5 (C), 143.8 (C), 151.7 (C), 157.0 (C) ppm.

**2-(4-Bromophenyl)-7-methylimidazo[1,2-a]pyrimidin-5(8H)-one (4c)** was obtained in 80% yield (243 mg) from 2-bromo-4'-bromoacetophenone (**2c**, 278 mg, 1.00 mmol). Mp > 300 °C (amorphous, Lit.<sup>7</sup> > 300 °C) [3]. <sup>1</sup>H NMR (400 MHz, DMSO-*d*<sub>6</sub>):  $\delta$  = 2.29 (s, 3H), 5.63 (s, 1H), 7.59 (d, *J* = 7.7 Hz, 2H), 7.85 (d, *J* = 7.7 Hz, 2H), 8.11 (s, 1H), 12.82 (br s, 1H) ppm. <sup>13</sup>C{<sup>1</sup>H} NMR (101 MHz, DMSO-*d*<sub>6</sub>):  $\delta$  = 19.3 (CH<sub>3</sub>), 95.0 (CH), 104.2 (CH), 120.6 (C), 127.1 (CH), 131.5 (CH), 131.7 (C), 137.3 (C), 143.7 (C), 152.2 (C), 157.0 (C) ppm.

**2-(4-Methoxyphenyl)-7-methylimidazo[1,2-a]pyrimidin-5(8H)-one (4d)** was obtained in 85% yield (217 mg) from 2-bromo-4'-methoxyacetophenone (**2d**, 234 mg, 1.02 mmol). Mp > 300 °C (amorphous, Lit.<sup>7</sup> > 300 °C). <sup>1</sup>H NMR (400 MHz, DMSO-*d*<sub>6</sub>):  $\delta$  = 2.29 (s, 3H), 3.79 (s, 3H), 5.64 (s, 1H), 6.99 (d, *J* = 8.7 Hz, 2H), 7.83 (d, *J* = 8.7 Hz, 2H), 7.93 (s, 1H), 12.74 (br s, 1H) ppm. <sup>13</sup>C{<sup>1</sup>H} NMR (101 MHz, DMSO-*d*<sub>6</sub>):  $\delta$  = 20.1 (CH<sub>3</sub>), 55.1 (CH<sub>3</sub>), 95.4 (CH), 102.1 (CH), 114.2 (CH), 124.2 (C), 126.6 (CH), 137.0 (C), 144.2 (C), 153.9 (C), 157.0 (C), 159.1 (C) ppm.

**2-(4-Nitrophenyl)-7-methylimidazo[1,2-*a*]pyrimidin-5(8*H*)-one (4e)** was obtained in 75% yield (217 mg) from 2-bromo-4'-nitroacetophenone (**2e**, 249 mg, 1.02 mmol). Mp 281–282 °C (amorphous, Lit.<sup>7</sup> > 300 °C). <sup>1</sup>H NMR (400 MHz, DMSO-*d*<sub>6</sub>): δ = 2.30 (s, 3H), 5.63 (s, 1H), 8.12 (d, *J* = 8.8 Hz, 2H), 8.21 (d, *J* = 8.8 Hz, 2H), 8.30 (s, 1H), 12.89 (br s, 1H) ppm. <sup>13</sup>C{<sup>1</sup>H} NMR (101 MHz, DMSO-*d*<sub>6</sub>): δ = 19.0 (CH<sub>3</sub>), 94.9 (CH), 106.9 (CH), 123.9 (CH), 125.8 (CH), 137.6 (C), 139.6 (C), 143.8 (C), 146.2 (C), 152.2 (C), 157.0 (C) ppm.

### 2.2.3. Synthesis of 8-alkyl-2-aryl-7-methylimidazo[1,2-*a*]pyrimidin-5(8*H*)-ones 6a-p.

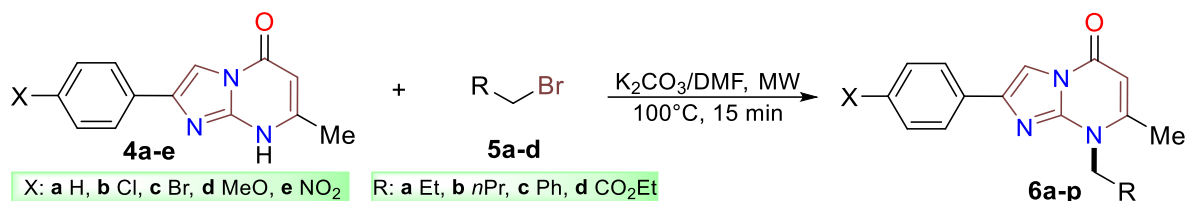

A mixture of 2-aryl-7-methylimidazo[1,2-*a*]pyrimidin-5(8*H*)-one **4a-e** (0.50 mmol), K<sub>2</sub>CO<sub>3</sub> (104 mg, 0.75 mmol), and alkyl bromide **5a-d** (0.75 mmol) in DMF (1.0 mL) was subjected to microwave irradiation at 100 °C (110 W programmed but ~15% of this was necessary and constant. Temperature monitored by an IR sensor) for 15 min in a sealed tube containing a Teflon-coated magnetic stirring bar. The resulting reaction mixture was cooled to 55 °C by airflow, and the precipitated product formed after adding cold water (2.0 mL) was subjected to extraction with dichloromethane (3 × 10 mL). The organic phase was dried over anhydrous MgSO<sub>4</sub>, filtered, and concentrated under vacuum giving **6a-p** as white solids. 2-(4-Chlorophenyl) derivatives were characterized by comparing their data with information available in the literature, that is, NMR data for **6b** (*n*Pr), **6g** (*n*Bu), **6l** (Bn), and **6p** (ester) matched previously reported data.<sup>7</sup>

**7-Methyl-2-phenyl-8-propylimidazo[1,2-*a*]pyrimidin-5(8*H*)-one (6a)** was obtained in 85% yield (116 mg) from 7-methyl-2-phenylimidazo[1,2-*a*]pyrimidin-5(8*H*)-one (**4a**, 115 mg, 0.51 mmol) and 1-bromopropane (**5a**, 70 μL, 0.77 mmol). Mp 145–146 °C (amorphous). <sup>1</sup>H NMR (400 MHz, CDCl<sub>3</sub>): δ = 1.05 (t, *J* = 7.2 Hz, 3H), 1.84-1.94 (m, 2H), 2.41 (s, 3H), 4.25 (t, *J* = 7.7 Hz, 2H), 5.67 (s, 1H), 7.30 (t, *J* = 7.5 Hz, 1H), 7.40 (t, *J* = 7.5 Hz, 2H), 7.86 (s, 1H), 7.88 (d, *J* = 8.1 Hz, 2H) ppm. <sup>13</sup>C{<sup>1</sup>H} NMR (101 MHz, CDCl<sub>3</sub>): δ = 11.1 (CH<sub>3</sub>), 19.2 (CH<sub>3</sub>), 21.9 (CH<sub>2</sub>), 48.3 (CH<sub>2</sub>), 97.7 (CH), 104.5 (CH), 125.6 (CH), 127.8 (CH), 128.6 (CH), 133.1 (C), 141.2 (C), 143.7 (C), 150.0 (C), 157.1 (C) ppm. HRMS (ESI<sup>+</sup>): calcd for C<sub>16</sub>H<sub>18</sub>N<sub>3</sub>O<sup>+</sup>, 268.1444 [M + H]<sup>+</sup>; found, 268.1450.

**2-(4-Chlorophenyl)-7-methyl-8-propylimidazo[1,2-*a*]pyrimidin-5(8*H*)-one (6b)** was obtained in 92% yield (139 mg) from 2-(4-chlorophenyl)-7-methylimidazo[1,2-*a*]pyrimidin-5(8*H*)-one (**4b**, 130 mg, 0.50 mmol) and 1-bromopropane (**5a**, 70 μL, 0.77 mmol). Mp 159–160 °C (amorphous). <sup>1</sup>H NMR (400 MHz, CDCl<sub>3</sub>): δ = 1.03 (t, *J* = 7.5 Hz, 3H), 1.84-1.91 (m, 2H), 2.40 (s, 3H), 4.22 (t, *J* = 7.8 Hz, 2H), 5.65 (s, 1H), 7.34 (d, *J* = 8.6 Hz, 2H), 7.78 (d, *J* = 8.6 Hz, 2H), 7.80 (s, 1H) ppm. <sup>13</sup>C{<sup>1</sup>H} NMR (101 MHz, CDCl<sub>3</sub>): δ = 11.1 (CH<sub>3</sub>), 19.1 (CH<sub>3</sub>), 21.9 (CH<sub>2</sub>), 48.3 (CH<sub>2</sub>), 97.7 (CH), 104.6 (CH), 126.8 (CH), 128.7 (CH), 131.7 (C), 133.4 (C), 140.2 (C), 143.8 (C), 150.1 (C), 156.9 (C) ppm. HRMS (ESI<sup>+</sup>): calcd for C<sub>16</sub>H<sub>17</sub><sup>35</sup>ClN<sub>3</sub>O<sup>+</sup>, 302.1055 [M + H]<sup>+</sup>; found, 302.1045.<sup>7</sup>

**2-(4-Bromophenyl)-7-methyl-8-propylimidazo[1,2-*a*]pyrimidin-5(8*H*)-one (6c)** was obtained in 95% yield (164 mg) from 2-(4-bromophenyl)-7-methylimidazo[1,2-*a*]pyrimidin-5(8*H*)-one (**4c**, 152 mg, 0.50 mmol) and 1-bromopropane (**5a**, 70  $\mu$ L, 0.77 mmol). Mp 154–155 °C (amorphous).  $^1\text{H}$  NMR (400 MHz,  $\text{CDCl}_3$ ):  $\delta$  = 1.05 (t,  $J$  = 7.4 Hz, 3H), 1.86–1.96 (m, 2H), 2.43 (s, 3H), 4.25 (t,  $J$  = 7.5 Hz, 2H), 5.68 (s, 1H), 7.52 (d,  $J$  = 8.4 Hz, 2H), 7.74 (d,  $J$  = 8.4 Hz, 2H), 7.84 (br s, 1H) ppm.  $^{13}\text{C}\{^1\text{H}\}$  NMR (101 MHz,  $\text{CDCl}_3$ ):  $\delta$  = 11.1 ( $\text{CH}_3$ ), 19.2 ( $\text{CH}_3$ ), 22.0 ( $\text{CH}_2$ ), 48.4 ( $\text{CH}_2$ ), 97.8 (CH), 104.8 (CH), 121.6 (C), 127.2 (CH), 131.7 (CH), 132.2 (C), 140.3 (C), 143.9 (C), 150.1 (C), 157.0 (C) ppm. HRMS (ESI+): calcd for  $\text{C}_{16}\text{H}_{17}^{79}\text{BrN}_3\text{O}^+$ , 346.0550 [M + H] $^+$ ; found, 346.0538.

**2-(4-Methoxyphenyl)-7-methyl-8-propylimidazo[1,2-*a*]pyrimidin-5(8*H*)-one (6d)** was obtained in 80% yield (119 mg) from 2-(4-methoxyphenyl)-7-methylimidazo[1,2-*a*]pyrimidin-5(8*H*)-one (**4d**, 128 mg, 0.50 mmol) and 1-bromopropane (**5a**, 70  $\mu$ L, 0.77 mmol). Mp 114–115 °C (amorphous).  $^1\text{H}$  NMR (400 MHz,  $\text{CDCl}_3$ ):  $\delta$  = 1.06 (t,  $J$  = 7.3 Hz, 3H), 1.87–1.95 (m, 2H), 2.43 (s, 3H), 3.84 (s, 3H), 4.28 (t,  $J$  = 7.5 Hz, 2H), 5.69 (s, 1H), 6.95 (d,  $J$  = 8.8 Hz, 2H), 7.76 (s, 1H), 7.82 (d,  $J$  = 8.8 Hz, 2H) ppm.  $^{13}\text{C}\{^1\text{H}\}$  NMR (101 MHz,  $\text{CDCl}_3$ ):  $\delta$  = 11.1 ( $\text{CH}_3$ ), 19.2 ( $\text{CH}_3$ ), 22.0 ( $\text{CH}_2$ ), 48.4 ( $\text{CH}_2$ ), 55.3 ( $\text{CH}_3$ ), 97.8 (CH), 103.5 (CH), 114.1 (CH), 125.9 (C), 127.0 (CH), 141.2 (C), 143.7 (C), 149.7 (C), 157.1 (C), 159.5 (C) ppm. HRMS (ESI+): calcd for  $\text{C}_{17}\text{H}_{20}\text{N}_3\text{O}_2^+$ , 298.1550 [M + H] $^+$ ; found, 298.1552.

**7-Methyl-2-(4-nitrophenyl)-8-propylimidazo[1,2-*a*]pyrimidin-5(8*H*)-one (6e)** was obtained in 75% yield (117 mg) from 7-methyl-2-(4-nitrophenyl)imidazo[1,2-*a*]pyrimidin-5(8*H*)-one (**4e**, 135 mg, 0.50 mmol) and 1-bromopropane (**5a**, 70  $\mu$ L, 0.77 mmol). Mp 224–225 °C (amorphous).  $^1\text{H}$  NMR (400 MHz,  $\text{CDCl}_3$ ):  $\delta$  = 1.06 (t,  $J$  = 7.5 Hz, 3H), 1.87–1.94 (m, 2H), 2.45 (s, 3H), 4.26 (t,  $J$  = 7.7 Hz, 2H), 5.70 (s, 1H), 7.97 (s, 1H), 8.00 (d,  $J$  = 9.0 Hz, 2H), 8.23 (d,  $J$  = 9.0 Hz, 2H) ppm.  $^{13}\text{C}\{^1\text{H}\}$  NMR (101 MHz,  $\text{CDCl}_3$ ):  $\delta$  = 11.1 ( $\text{CH}_3$ ), 19.3 ( $\text{CH}_3$ ), 22.0 ( $\text{CH}_2$ ), 48.4 ( $\text{CH}_2$ ), 98.0 (CH), 106.9 (CH), 124.0 (CH), 126.1 (CH), 139.1 (C), 139.6 (C), 144.2 (C), 147.0 (C), 150.8 (C), 156.8 (C) ppm. HRMS (ESI+): calcd for  $\text{C}_{16}\text{H}_{17}\text{N}_4\text{O}_3^+$ , 313.1295 [M + H] $^+$ ; found, 313.1300.

**8-Butyl-7-methyl-2-phenylimidazo[1,2-*a*]pyrimidin-5(8*H*)-one (6f)** was obtained in 80% yield (87 mg) from 7-methyl-2-phenylimidazo[1,2-*a*]pyrimidin-5(8*H*)-one (**4a**, 115 mg, 0.51 mmol) and 1-bromobutane (**5b**, 80  $\mu$ L, 0.74 mmol). Mp 145–146 °C (amorphous).  $^1\text{H}$  NMR (400 MHz,  $\text{CDCl}_3$ ):  $\delta$  = 1.01 (t,  $J$  = 7.4 Hz, 3H), 1.42–1.53 (m, 2H), 1.81–1.86 (m, 2H), 2.40 (s, 3H), 4.29 (t,  $J$  = 7.7 Hz, 2H), 5.66 (s, 1H), 7.30 (t,  $J$  = 7.4 Hz, 1H), 7.41 (t,  $J$  = 7.5 Hz, 2H), 7.86 (s, 1H), 7.88 (d,  $J$  = 7.6 Hz, 2H) ppm.  $^{13}\text{C}\{^1\text{H}\}$  NMR (101 MHz,  $\text{CDCl}_3$ ):  $\delta$  = 13.7 ( $\text{CH}_3$ ), 19.2 ( $\text{CH}_2$ ), 20.0 ( $\text{CH}_3$ ), 30.7 ( $\text{CH}_2$ ), 46.7 ( $\text{CH}_2$ ), 97.8 (CH), 104.6 (CH), 125.7 (CH), 127.9 (CH), 128.6 (CH), 133.2 (C), 141.3 (C), 143.8 (C), 150.0 (C), 157.1 (C) ppm. HRMS (ESI+): calcd for  $\text{C}_{17}\text{H}_{20}\text{N}_3\text{O}^+$ , 282.1601 [M + H] $^+$ ; found, 282.1598.

**8-Butyl-2-(4-chlorophenyl)-7-methylimidazo[1,2-*a*]pyrimidin-5(8*H*)-one (6g)** was obtained in 82% yield (129 mg) from 2-(4-chlorophenyl)-7-methylimidazo[1,2-*a*]pyrimidin-5(8*H*)-one (**4b**, 130 mg, 0.50 mmol) and 1-bromobutane (**5b**, 80  $\mu$ L, 0.74 mmol). Mp 116–117 °C (amorphous).  $^1\text{H}$  NMR (400 MHz,  $\text{CDCl}_3$ ):  $\delta$  = 1.02 (t,  $J$  = 7.4 Hz, 3H), 1.45–1.52 (m, 2H), 1.81–1.86 (m, 2H), 2.43 (s, 3H), 4.29 (t,  $J$  = 7.8 Hz, 2H), 5.68 (s, 1H), 7.37 (d,  $J$  = 8.5 Hz, 2H), 7.80 (d,  $J$  = 8.5 Hz, 2H), 7.83 (s, 1H) ppm.  $^{13}\text{C}\{^1\text{H}\}$  NMR (101 MHz,  $\text{CDCl}_3$ ):  $\delta$  = 13.7 ( $\text{CH}_3$ ), 19.2 ( $\text{CH}_3$ ), 20.0 ( $\text{CH}_2$ ), 30.7 ( $\text{CH}_2$ ), 46.7 ( $\text{CH}_2$ ), 97.9 (CH), 104.7 (CH), 126.9 (CH), 128.8 (CH), 131.7 (C),

133.5 (C), 140.2 (C), 143.8 (C), 150.1 (C), 157.0 (C) ppm. HRMS (ESI+): calcd for C<sub>17</sub>H<sub>19</sub><sup>35</sup>ClN<sub>3</sub>O<sup>+</sup>, 316.1211 [M + H]<sup>+</sup>; found, 316.1215.<sup>7</sup>

**2-(4-Bromophenyl)-8-butyl-7-methylimidazo[1,2-*a*]pyrimidin-5(8*H*)-one (6h)** was obtained in 91% yield (164 mg) from 2-(4-bromophenyl)-7-methylimidazo[1,2-*a*]pyrimidin-5(8*H*)-one (**4c**, 152 mg, 0.50 mmol) and 1-bromobutane (**5b**, 80  $\mu$ L, 0.74 mmol). Mp 130–131 °C (amorphous). <sup>1</sup>H NMR (400 MHz, CDCl<sub>3</sub>):  $\delta$  = 1.02 (t, *J* = 7.3 Hz, 3H), 1.45–1.51 (m, 2H), 1.81–1.86 (m, 2H), 2.43 (s, 3H), 4.28 (t, *J* = 7.7 Hz, 2H), 5.68 (s, 1H), 7.52 (d, *J* = 8.6 Hz, 2H), 7.74 (d, *J* = 8.6 Hz, 2H), 7.84 (s, 1H) ppm. <sup>13</sup>C{<sup>1</sup>H} NMR (101 MHz, CDCl<sub>3</sub>):  $\delta$  = 13.7 (CH<sub>3</sub>), 19.2 (CH<sub>3</sub>), 20.0 (CH<sub>2</sub>), 30.7 (CH<sub>2</sub>), 46.7 (CH<sub>2</sub>), 97.8 (CH), 104.8 (CH), 121.6 (C), 127.2 (CH), 131.7 (CH), 132.2 (C), 140.2 (C), 143.8 (C), 150.1 (C), 157.0 (C) ppm. HRMS (ESI+): calcd for C<sub>17</sub>H<sub>19</sub><sup>79</sup>BrN<sub>3</sub>O<sup>+</sup>, 360.0706 [M + H]<sup>+</sup>; found, 360.0710.

**8-Butyl-2-(4-methoxyphenyl)-7-methylimidazo[1,2-*a*]pyrimidin-5(8*H*)-one (6i)** was obtained in 82% yield (128 mg) from 2-(4-methoxyphenyl)-7-methylimidazo[1,2-*a*]pyrimidin-5(8*H*)-one (**4d**, 128 mg, 0.50 mmol) and 1-bromobutane (**5b**, 80  $\mu$ L, 0.74 mmol). Mp 99–100 °C (amorphous). <sup>1</sup>H NMR (400 MHz, CDCl<sub>3</sub>):  $\delta$  = 1.02 (t, *J* = 7.3 Hz, 3H), 1.43–1.52 (m, 2H), 1.81–1.88 (m, 2H), 2.43 (s, 3H), 3.85 (s, 3H), 4.32 (t, *J* = 7.7 Hz, 2H), 5.69 (s, 1H), 6.96 (d, *J* = 8.8 Hz, 2H), 7.77 (s, 1H), 7.82 (d, *J* = 8.8 Hz, 2H) ppm. <sup>13</sup>C{<sup>1</sup>H} NMR (101 MHz, CDCl<sub>3</sub>):  $\delta$  = 13.7 (CH<sub>3</sub>), 19.1 (CH<sub>3</sub>), 20.0 (CH<sub>2</sub>), 30.8 (CH<sub>2</sub>), 46.8 (CH<sub>2</sub>), 55.3 (CH<sub>3</sub>), 97.9 (CH), 103.5 (CH), 114.2 (CH), 125.9 (C), 127.1 (CH), 141.2 (C), 143.7 (C), 149.7 (C), 157.1 (C), 159.6 (C) ppm. HRMS (ESI+): calcd for C<sub>18</sub>H<sub>22</sub>N<sub>3</sub>O<sub>2</sub><sup>+</sup>, 312.1707 [M + H]<sup>+</sup>; found, 312.1710.

**8-Butyl-7-methyl-2-(4-nitrophenyl)imidazo[1,2-*a*]pyrimidin-5(8*H*)-one (6j)** was obtained in 73% yield (119 mg) from 7-methyl-2-(4-nitrophenyl)imidazo[1,2-*a*]pyrimidin-5(8*H*)-one (**4e**, 135 mg, 0.50 mmol) and 1-bromobutane (**5b**, 80  $\mu$ L, 0.74 mmol). Mp 199–200 °C (amorphous). <sup>1</sup>H NMR (400 MHz, CDCl<sub>3</sub>):  $\delta$  = 1.03 (t, *J* = 7.4 Hz, 3H), 1.46–1.52 (m, 2H), 1.81–1.89 (m, 2H), 2.46 (s, 3H), 4.31 (t, *J* = 7.8 Hz, 2H), 5.71 (s, 1H), 7.99 (s, 1H), 8.01 (d, *J* = 9.0 Hz, 2H), 8.25 (d, *J* = 9.0 Hz, 2H) ppm. <sup>13</sup>C{<sup>1</sup>H} NMR (101 MHz, CDCl<sub>3</sub>):  $\delta$  = 13.7 (CH<sub>3</sub>), 19.3 (CH<sub>3</sub>), 20.0 (CH<sub>2</sub>), 30.7 (CH<sub>2</sub>), 46.8 (CH<sub>2</sub>), 98.0 (CH), 106.9 (CH), 124.1 (CH), 126.10 (CH), 139.1 (C), 139.6 (C), 144.2 (C), 147.0 (C), 150.8 (C), 156.8 (C) ppm. HRMS (ESI+): calcd for C<sub>17</sub>H<sub>19</sub>N<sub>4</sub>O<sub>3</sub><sup>+</sup>, 327.1452 [M + H]<sup>+</sup>; found, 327.1450.

**8-Benzyl-7-methyl-2-phenylimidazo[1,2-*a*]pyrimidin-5(8*H*)-one (6k)** was obtained in 90% yield (142 mg) from 7-methyl-2-phenylimidazo[1,2-*a*]pyrimidin-5(8*H*)-one (**4a**, 115 mg, 0.51 mmol) and benzyl bromide (**5c**, 90  $\mu$ L, 0.76 mmol). Mp 175–176 °C (amorphous). <sup>1</sup>H NMR (400 MHz, CDCl<sub>3</sub>):  $\delta$  = 2.31 (s, 3H), 5.60 (s, 2H), 5.70 (s, 1H), 7.24–7.36 (m, 6H), 7.39 (t, *J* = 8.0 Hz, 2H), 7.88 (d, *J* = 8.0 Hz, 2H), 7.91 (s, 1H) ppm. <sup>13</sup>C{<sup>1</sup>H} NMR (101 MHz, CDCl<sub>3</sub>):  $\delta$  = 19.4 (CH<sub>3</sub>), 49.8 (CH<sub>2</sub>), 98.1 (CH), 104.9 (CH), 125.7 (CH), 126.7 (CH), 127.9 (CH), 128.1 (CH), 128.6 (CH), 129.0 (CH), 133.1 (C), 135.5 (C), 141.4 (C), 144.6 (C), 150.6 (C), 157.1 (C) ppm. HRMS (ESI+): calcd for C<sub>20</sub>H<sub>18</sub>N<sub>3</sub>O<sup>+</sup>, 316.1444 [M + H]<sup>+</sup>; found, 316.1450.

**8-Benzyl-2-(4-chlorophenyl)-7-methylimidazo[1,2-*a*]pyrimidin-5(8*H*)-one (6l)** was obtained in 94% yield (164 mg) from 2-(4-chlorophenyl)-7-methylimidazo[1,2-*a*]pyrimidin-5(8*H*)-one (**4b**, 130 mg, 0.50 mmol)



and benzyl bromide (**5c**, 90  $\mu$ L, 0.76 mmol). Mp 227–228 °C (amorphous).  $^1\text{H}$  NMR (400 MHz,  $\text{CDCl}_3$ ):  $\delta$  = 2.34 (s, 3H), 5.60 (s, 2H), 5.72 (s, 1H), 7.23–7.36 (m, 7H), 7.80 (d,  $J$  = 8.3 Hz, 2H), 7.89 (s, 1H) ppm.  $^{13}\text{C}\{^1\text{H}\}$  NMR (101 MHz,  $\text{CDCl}_3$ ):  $\delta$  = 19.4 ( $\text{CH}_3$ ), 49.9 ( $\text{CH}_2$ ), 98.3 (CH), 105.1 (CH), 126.6 (CH), 126.9 (CH), 128.2 (CH), 128.8 (CH), 129.1 (CH), 131.7 (C), 133.6 (C), 135.5 (C), 140.5 (C), 144.7 (C), 150.7 (C), 157.0 (C) ppm. HRMS (ESI+): calcd for  $\text{C}_{16}\text{H}_{17}^{35}\text{ClN}_3\text{O}^+$ , 350.1055 [ $\text{M} + \text{H}$ ] $^+$ ; found, 350.1058.<sup>7</sup>

**8-Benzyl-2-(4-bromophenyl)-7-methylimidazo[1,2-*a*]pyrimidin-5(8*H*)-one (6m)** was obtained in 96% yield (189 mg) from 2-(4-bromophenyl)-7-methylimidazo[1,2-*a*]pyrimidin-5(8*H*)-one (**4c**, 152 mg, 0.50 mmol) and benzyl bromide (**5c**, 90  $\mu$ L, 0.76 mmol). Mp 232–233 °C (amorphous).  $^1\text{H}$  NMR (400 MHz,  $\text{CDCl}_3$ ):  $\delta$  = 2.34 (s, 3H), 5.60 (s, 2H), 5.72 (s, 1H), 7.24 (d,  $J$  = 7.4 Hz, 2H), 7.29–7.37 (m, 3H), 7.51 (d,  $J$  = 8.5 Hz, 2H), 7.74 (d,  $J$  = 8.5 Hz, 2H), 7.90 (s, 1H) ppm.  $^{13}\text{C}\{^1\text{H}\}$  NMR (101 MHz,  $\text{CDCl}_3$ ):  $\delta$  = 19.4 ( $\text{CH}_3$ ), 49.9 ( $\text{CH}_2$ ), 98.3 (CH), 105.2 (CH), 121.8 (C), 126.6 (CH), 127.2 (CH), 128.2 (CH), 129.1 (CH), 131.8 (CH), 132.2 (C), 135.4 (C), 140.5 (C), 144.7 (C), 150.8 (C), 157.0 (C) ppm. HRMS (ESI+): calcd for  $\text{C}_{20}\text{H}_{17}^{79}\text{BrN}_3\text{O}^+$ , 394.0550 [ $\text{M} + \text{H}$ ] $^+$ ; found, 394.0554.

**8-Benzyl-2-(4-methoxyphenyl)-7-methylimidazo[1,2-*a*]pyrimidin-5(8*H*)-one (6n)** was obtained in 91% yield (157 mg) from 2-(4-methoxyphenyl)-7-methylimidazo[1,2-*a*]pyrimidin-5(8*H*)-one (**4d**, 128 mg, 0.50 mmol) and benzyl bromide (**5c**, 90  $\mu$ L, 0.76 mmol). Mp 207–208 °C (amorphous).  $^1\text{H}$  NMR (400 MHz,  $\text{CDCl}_3$ ):  $\delta$  = 2.33 (s, 3H), 3.84 (s, 3H), 5.62 (s, 2H), 5.71 (s, 1H), 6.94 (d,  $J$  = 8.8 Hz, 2H), 7.25–7.36 (m, 5H), 7.80–7.83 (m, 3H) ppm.  $^{13}\text{C}\{^1\text{H}\}$  NMR (101 MHz,  $\text{CDCl}_3$ ):  $\delta$  = 19.4 ( $\text{CH}_3$ ), 49.9 ( $\text{CH}_2$ ), 55.3 ( $\text{CH}_3$ ), 98.2 (CH), 103.8 (CH), 114.1 (CH), 126.0 (C), 126.7 (CH), 127.0 (CH), 128.1 (CH), 129.1 (CH), 135.7 (C), 141.5 (C), 144.6 (C), 150.3 (C), 157.1 (C), 159.6 (C) ppm. HRMS (ESI+): calcd for  $\text{C}_{21}\text{H}_{20}\text{N}_3\text{O}_2^+$ , 346.1550 [ $\text{M} + \text{H}$ ] $^+$ ; found, 346.1552.

**8-Benzyl-7-methyl-2-(4-nitrophenyl)imidazo[1,2-*a*]pyrimidin-5(8*H*)-one (6o)** was obtained in 84% yield (151 mg) from 7-methyl-2-(4-nitrophenyl)imidazo[1,2-*a*]pyrimidin-5(8*H*)-one (**4d**, 135 mg, 0.50 mmol) and benzyl bromide (**5c**, 90  $\mu$ L, 0.76 mmol). Mp 230–231 °C (amorphous).  $^1\text{H}$  NMR (400 MHz,  $\text{CDCl}_3$ ):  $\delta$  = 2.37 (s, 3H), 5.63 (s, 2H), 5.76 (s, 1H), 7.24–7.39 (m, 5H), 8.01 (d,  $J$  = 9.0 Hz, 2H), 8.05 (s, 1H), 8.25 (d,  $J$  = 9.0 Hz, 2H) ppm.  $^{13}\text{C}\{^1\text{H}\}$  NMR (101 MHz,  $\text{CDCl}_3$ ):  $\delta$  = 19.5 ( $\text{CH}_3$ ), 50.0 ( $\text{CH}_2$ ), 98.5 (CH), 107.3 (CH), 124.1 (CH), 126.1 (CH), 126.6 (CH), 128.3 (CH), 129.2 (CH), 135.2 (C), 139.3 (C), 139.6 (C), 145.1 (C), 147.1 (C), 151.4 (C), 156.8 (C) ppm. HRMS (ESI+): calcd for  $\text{C}_{20}\text{H}_{17}\text{N}_4\text{O}_3^+$ , 361.1295 [ $\text{M} + \text{H}$ ] $^+$ ; found, 361.1299.

**Ethyl 2-(2-(4-chlorophenyl)-7-methyl-5-oxoimidazo[1,2-*a*]pyrimidin-8(5*H*)-yl)acetate (6p)** was obtained in 79% yield (139 mg) from 2-(4-chlorophenyl)-7-methylimidazo[1,2-*a*]pyrimidin-5(8*H*)-one (**4b**, 115 mg, 0.51 mmol) and ethyl bromoacetate (**5d**, 90  $\mu$ L, 0.81 mmol). Mp 190–191 °C (amorphous).  $^1\text{H}$  NMR (400 MHz,  $\text{CDCl}_3$ ):  $\delta$  = 1.32 (t,  $J$  = 7.2 Hz, 3H), 2.36 (s, 3H), 4.29 (q,  $J$  = 7.2 Hz, 2H), 5.08 (s, 2H), 5.76 (s, 1H), 7.36 (d,  $J$  = 8.5 Hz, 2H), 7.77 (d,  $J$  = 8.4 Hz, 2H), 7.84 (s, 1H) ppm.  $^{13}\text{C}\{^1\text{H}\}$  NMR (101 MHz,  $\text{CDCl}_3$ ):  $\delta$  = 14.1 ( $\text{CH}_3$ ), 19.1 ( $\text{CH}_3$ ), 47.1 ( $\text{CH}_2$ ), 62.4 ( $\text{CH}_2$ ), 98.6 (CH), 105.2 (CH), 126.9 (CH), 128.8 (CH), 131.5 (C), 133.5 (C), 140.2 (C), 143.9 (C), 150.0 (C), 156.9 (C), 167.2 (C) ppm. HRMS (ESI+): calcd for  $\text{C}_{17}\text{H}_{17}^{35}\text{ClN}_3\text{O}_3^+$ , 346.0953 [ $\text{M} + \text{H}$ ] $^+$ ; found, 346.0952.<sup>7</sup>

#### 2.2.4. Synthesis of 2-aryl-3,6-dibromo-7-methyl-8-propylimidazo[1,2-*a*]pyrimidin-5(8*H*)-ones **8a-e**.

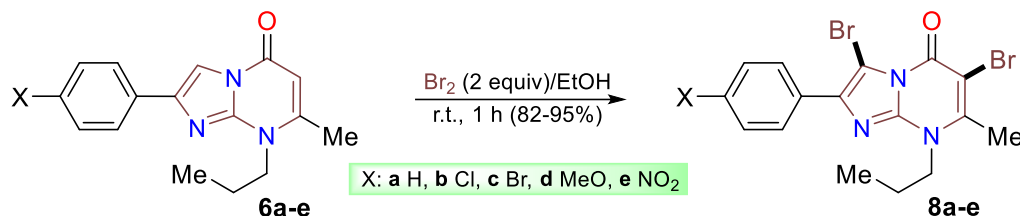

To a solution of 2-aryl-7-methyl-8-propylimidazo[1,2-*a*]pyrimidin-5(8*H*)-one **6a-e** (0.50 mmol) in absolute ethanol (2 mL), bromine (1 mmol, 52  $\mu\text{L}$ ) was added drop by dropwise over 5 min. The reaction mixture was then stirred at room temperature for 1 h. Subsequently, distilled water (5.0 mL) was added, and the resulting mixture was extracted with dichloromethane ( $3 \times 10$  mL). The organic phase was dried over anhydrous  $\text{MgSO}_4$ , filtered, and the solution was concentrated under vacuum. The crude residue was purified by column flash chromatography on silica gel (eluent: DCM or DCM/*n*-hexane as eluents), resulting in the pure product **8a-e** as white/yellow solids in high yields.

**3,6-Dibromo-7-methyl-2-phenyl-8-propylimidazo[1,2-*a*]pyrimidin-5(8*H*)-one (**8a**)** was obtained in 89% yield (189 mg) from 7-methyl-2-phenyl-8-propylimidazo[1,2-*a*]pyrimidin-5(8*H*)-one (**6a**, 133 mg, 0.5 mmol). Mp 185–186 °C (amorphous).  $^1\text{H}$  NMR (400 MHz,  $\text{CDCl}_3$ ):  $\delta$  = 1.05 (t,  $J$  = 7.4 Hz, 3H), 1.83–1.91 (m, 2H), 2.68 (s, 3H), 4.35 (t,  $J$  = 7.4 Hz, 2H), 7.36 (t,  $J$  = 7.4 Hz, 1H), 7.44 (t,  $J$  = 7.4 Hz, 2H), 8.03 (d,  $J$  = 8.1 Hz, 2H) ppm.  $^{13}\text{C}\{^1\text{H}\}$  NMR (101 MHz,  $\text{CDCl}_3$ ):  $\delta$  = 11.1 ( $\text{CH}_3$ ), 19.8 ( $\text{CH}_3$ ), 22.0 ( $\text{CH}_2$ ), 49.7 ( $\text{CH}_2$ ), 89.7 (C), 95.6 (C), 128.0 (CH), 128.3 (CH  $\times$  2), 132.1 (C), 139.9 (C), 143.0 (C), 148.2 (C), 154.3 (C) ppm. HRMS (ESI+): calcd for  $\text{C}_{16}\text{H}_{16}^{79}\text{Br}_2\text{N}_3\text{O}^+$ , 423.9655 [M + H] $^+$ ; found, 423.9660.

**3,6-Dibromo-2-(4-chlorophenyl)-7-methyl-8-propylimidazo[1,2-*a*]pyrimidin-5(8*H*)-one (**8b**)** was obtained in 93% yield (214 mg) from 2-(4-chlorophenyl)-7-methyl-8-propylimidazo[1,2-*a*]pyrimidin-5(8*H*)-one (**6b**, 150 mg, 0.5 mmol). Mp 229–230 °C (amorphous).  $^1\text{H}$  NMR (400 MHz,  $\text{CDCl}_3$ ):  $\delta$  = 1.05 (t,  $J$  = 7.4 Hz, 3H), 1.84–1.91 (m, 2H), 2.68 (s, 3H), 4.34 (t,  $J$  = 7.8 Hz, 2H), 7.40 (t,  $J$  = 8.7 Hz, 2H), 7.99 (t,  $J$  = 8.7 Hz, 2H) ppm.  $^{13}\text{C}\{^1\text{H}\}$  NMR (101 MHz,  $\text{CDCl}_3$ ):  $\delta$  = 11.1 ( $\text{CH}_3$ ), 19.8 ( $\text{CH}_3$ ), 22.0 ( $\text{CH}_2$ ), 49.7 ( $\text{CH}_2$ ), 89.8 (C), 95.7 (C), 128.5 (CH), 129.2 (CH), 130.6 (C), 134.2 (C), 138.8 (C), 143.0 (C), 148.4 (C), 154.3 (C) ppm. HRMS (ESI+): calcd for  $\text{C}_{16}\text{H}_{15}^{79}\text{Br}_2^{35}\text{ClN}_3\text{O}^+$ , 457.9265 [M + H] $^+$ ; found, 457.9283.

**3,6-Dibromo-2-(4-bromophenyl)-7-methyl-8-propylimidazo[1,2-*a*]pyrimidin-5(8*H*)-one (**8c**)** was obtained in 95% yield (239 mg) from 2-(4-bromophenyl)-7-methyl-8-propylimidazo[1,2-*a*]pyrimidin-5(8*H*)-one (**6c**, 173 mg, 0.5 mmol). Mp 223–224 °C (amorphous).  $^1\text{H}$  NMR ( $\text{CDCl}_3$ ,  $\text{CDCl}_3$ ):  $\delta$  = 1.05 (t,  $J$  = 7.5 Hz, 3H), 1.82–1.92 (m, 2H), 2.69 (s, 3H), 4.34 (t,  $J$  = 7.9 Hz, 2H), 7.56 (d,  $J$  = 8.7 Hz, 2H), 7.93 (d,  $J$  = 8.7 Hz, 2H) ppm.  $^{13}\text{C}\{^1\text{H}\}$  NMR (101 MHz,  $\text{CDCl}_3$ ):  $\delta$  = 11.1 ( $\text{CH}_3$ ), 19.8 ( $\text{CH}_3$ ), 22.0 ( $\text{CH}_2$ ), 49.7 ( $\text{CH}_2$ ), 89.9 (C), 95.8 (C), 122.5 (C), 129.4 (CH), 131.0 (C), 131.5 (CH), 138.9 (C), 143.0 (C), 148.4 (C), 154.3 (C) ppm. HRMS (ESI+): calcd for  $\text{C}_{16}\text{H}_{15}^{79}\text{Br}_3\text{N}_3\text{O}^+$ , 501.8760 [M + H] $^+$ ; found, 501.8757.

**3,6-Dibromo-2-(4-methoxyphenyl)-7-methyl-8-propylimidazo[1,2-*a*]pyrimidin-5(8*H*)-one (8d)** was obtained in 90% yield (205 mg) from 2-(4-methoxyphenyl)-7-methyl-8-propylimidazo[1,2-*a*]pyrimidin-5(8*H*)-one (**6d**, 148 mg, 0.5 mmol). Mp 200–201 °C (amorphous). <sup>1</sup>H NMR (400 MHz, CDCl<sub>3</sub>): δ = 1.04 (t, *J* = 7.4 Hz, 3H), 1.81–1.91 (m, 2H), 2.66 (s, 3H), 3.85 (s, 3H), 4.33 (t, *J* = 7.8 Hz, 2H), 6.97 (d, *J* = 8.8 Hz, 2H), 7.98 (d, *J* = 8.8 Hz, 2H) ppm. <sup>13</sup>C{<sup>1</sup>H} NMR (101 MHz, CDCl<sub>3</sub>): δ = 11.1 (CH<sub>3</sub>), 19.7 (CH<sub>3</sub>), 21.9 (CH<sub>2</sub>), 49.7 (CH<sub>2</sub>), 55.3 (CH<sub>3</sub>), 88.6 (C), 95.6 (C), 113.7 (CH), 124.6 (C), 129.2 (CH), 139.7 (C), 142.8 (C), 148.0 (C), 154.3 (C), 159.7 (C) ppm. HRMS (ESI+): calcd for C<sub>17</sub>H<sub>18</sub><sup>79</sup>Br<sub>2</sub>N<sub>3</sub>O<sub>2</sub><sup>+</sup>, 453.9760 [M + H]<sup>+</sup>; found, 453.9764.

**3,6-Dibromo-7-methyl-2-(4-nitrophenyl)-8-propylimidazo[1,2-*a*]pyrimidin-5(8*H*)-one (8e)** was obtained in 82% yield (193 mg) from 7-methyl-2-(4-nitrophenyl)-8-propylimidazo[1,2-*a*]pyrimidin-5(8*H*)-one (**6e**, 235 mg, 0.5 mmol). Mp 227–228 °C (amorphous). <sup>1</sup>H NMR (400 MHz, CDCl<sub>3</sub>): δ = 1.08 (t, *J* = 7.5 Hz, 3H), 1.84–1.92 (m, 2H), 2.71 (s, 3H), 4.37 (t, *J* = 7.9 Hz, 2H), 8.27 (s, 4H) ppm. <sup>13</sup>C{<sup>1</sup>H} NMR (101 MHz, CDCl<sub>3</sub>): δ = 11.1 (CH<sub>3</sub>), 19.9 (CH<sub>3</sub>), 22.0 (CH<sub>2</sub>), 49.9 (CH<sub>2</sub>), 91.9 (C), 95.9 (C), 123.5 (CH), 128.4 (CH), 137.6 (C), 138.5 (C), 143.4 (C), 147.2 (C), 149.0 (C), 154.2 (C) ppm. HRMS (ESI+): calcd for C<sub>16</sub>H<sub>15</sub><sup>79</sup>Br<sub>2</sub>N<sub>4</sub>O<sub>3</sub><sup>+</sup>, 468.9505 [M + H]<sup>+</sup>; found, 468.9510.

### 3. Copies of NMR spectra

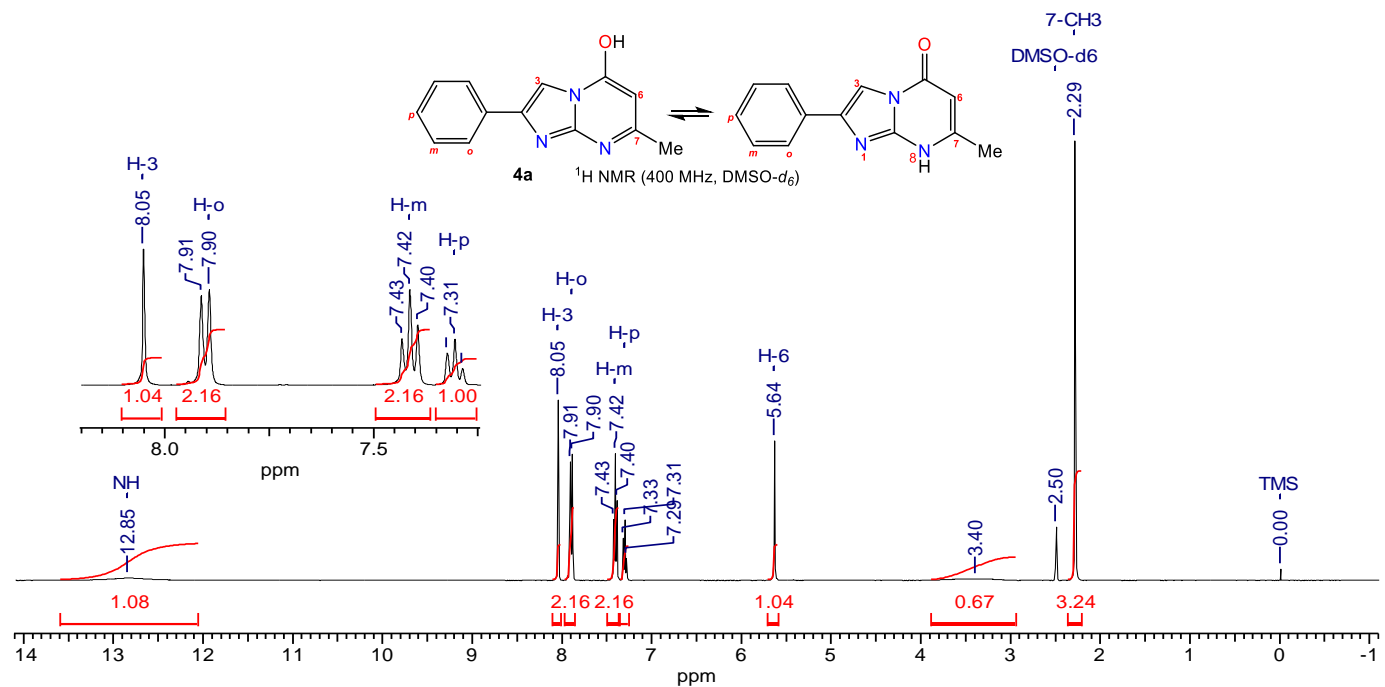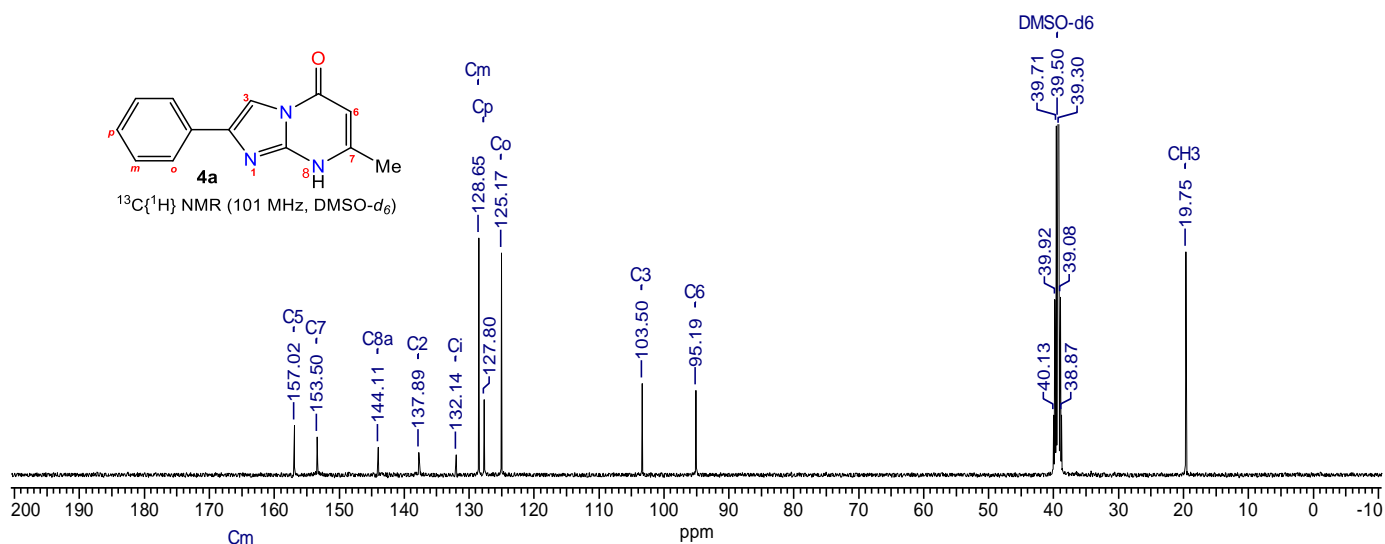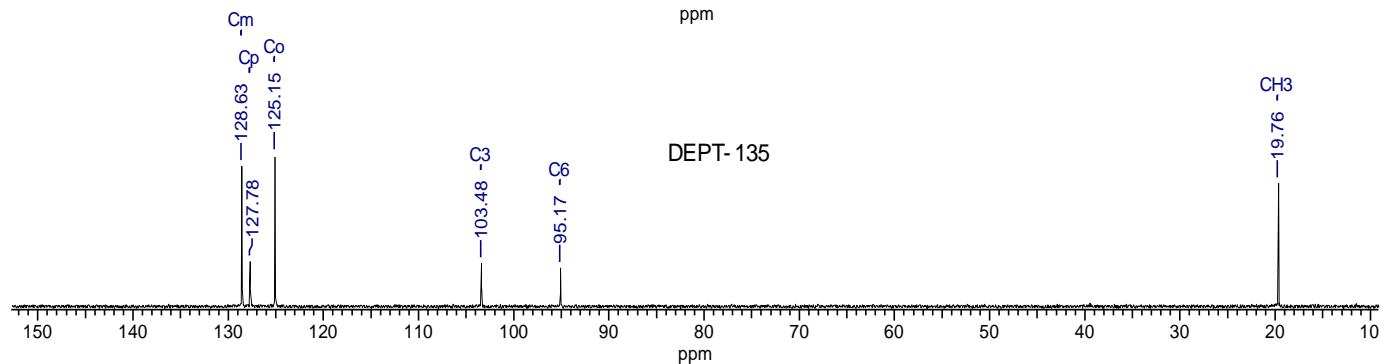

**Fig. S3** <sup>1</sup>H and <sup>13</sup>C{<sup>1</sup>H} NMR spectra of 7-methyl-2-phenylimidazo[1,2-a]pyrimidin-5(8H)-one (**4a**)

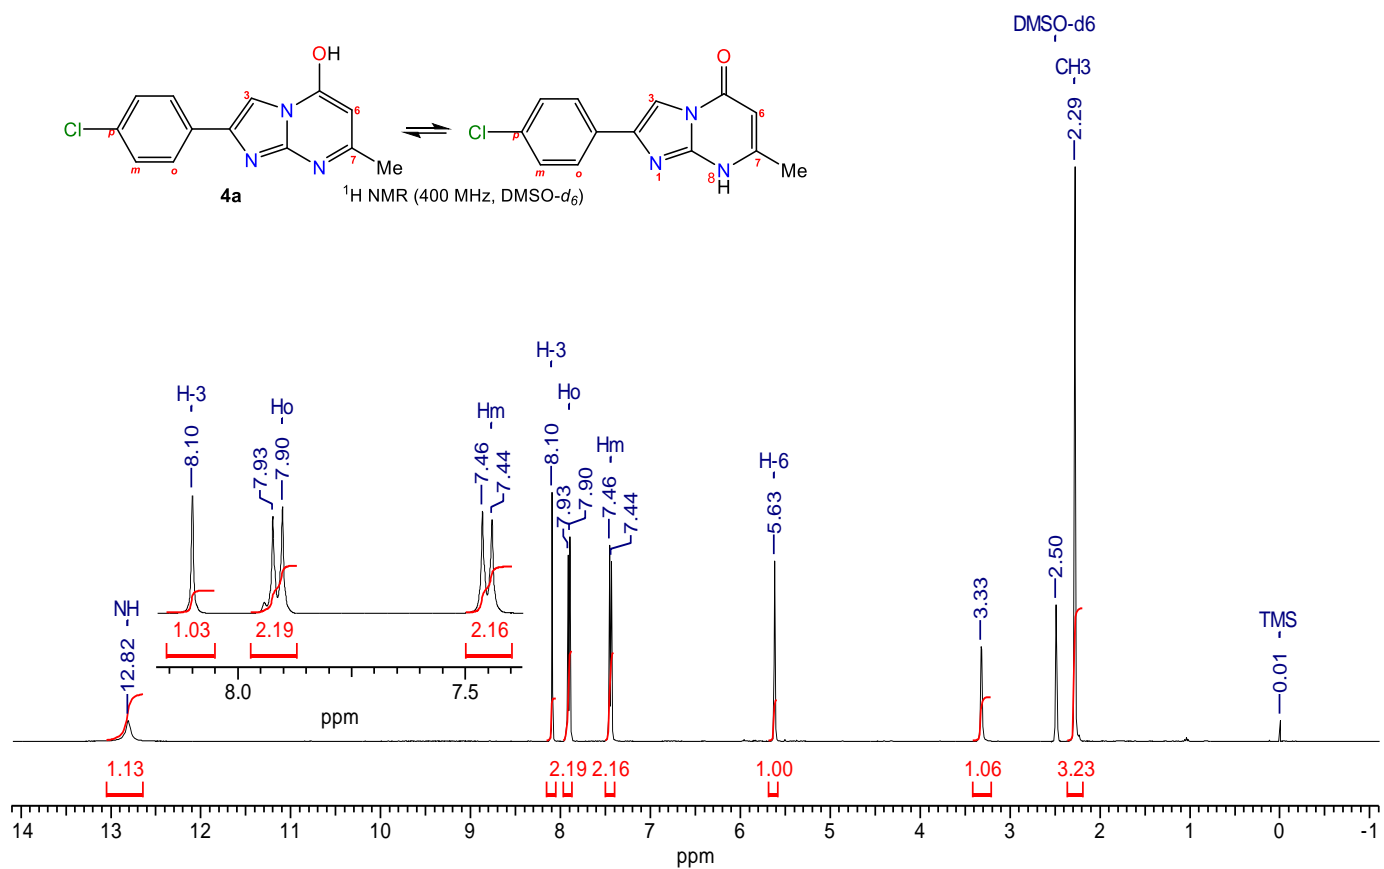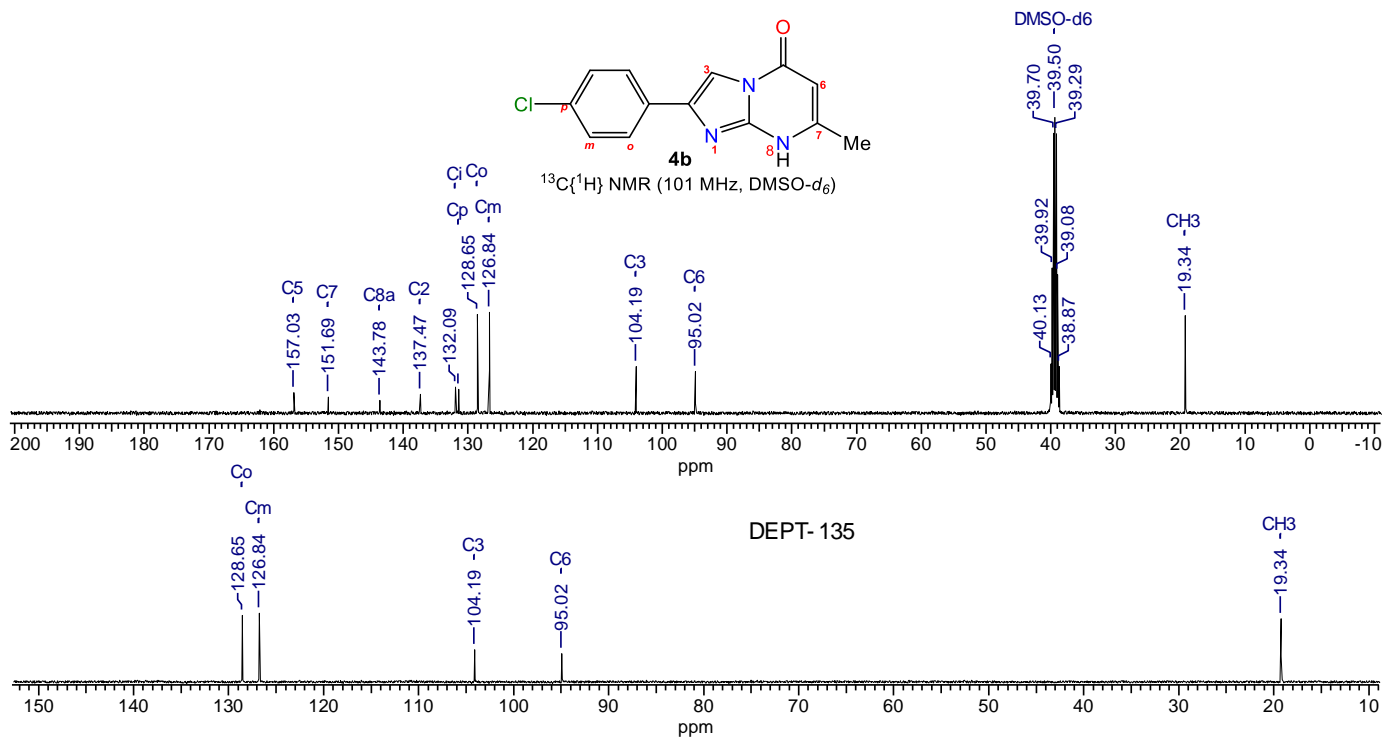

Fig. S4 <sup>1</sup>H and <sup>13</sup>C{<sup>1</sup>H} NMR spectra of 2-(4-chlorophenyl)-7-methylimidazo[1,2-a]pyrimidin-5(8H)-one (**4b**)

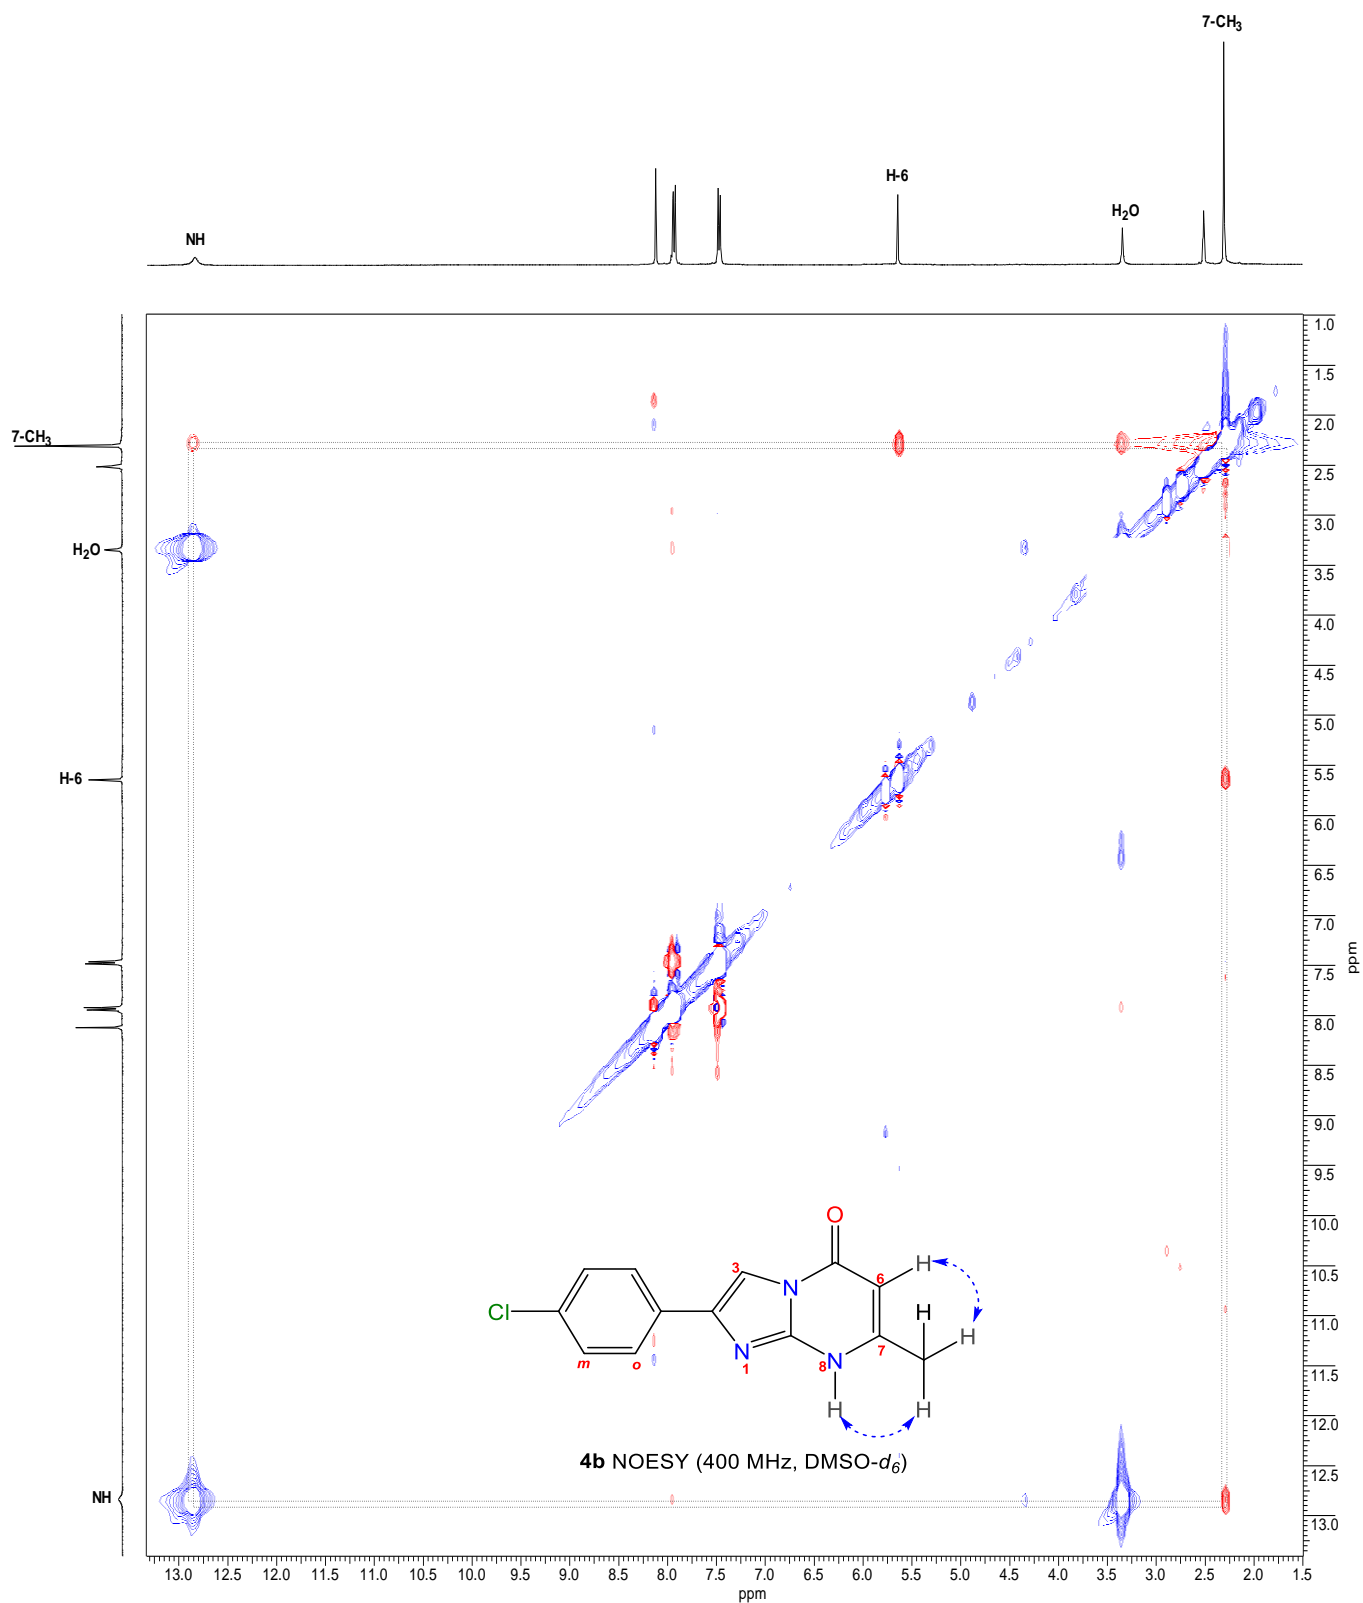

Fig. S5 <sup>1</sup>H and <sup>13</sup>C{<sup>1</sup>H} NMR spectra of 2-(4-chlorophenyl)-7-methylimidazo[1,2-*a*]pyrimidin-5(8*H*)-one (**4b**)

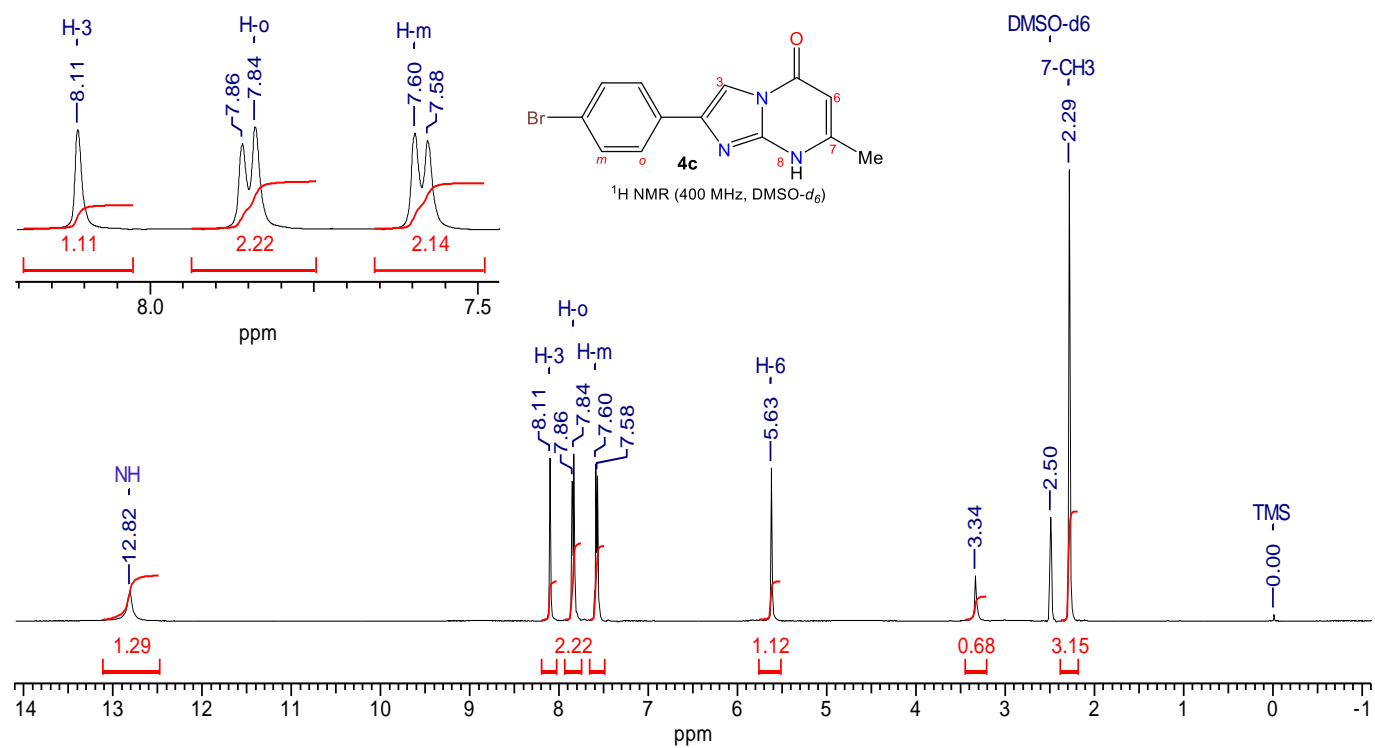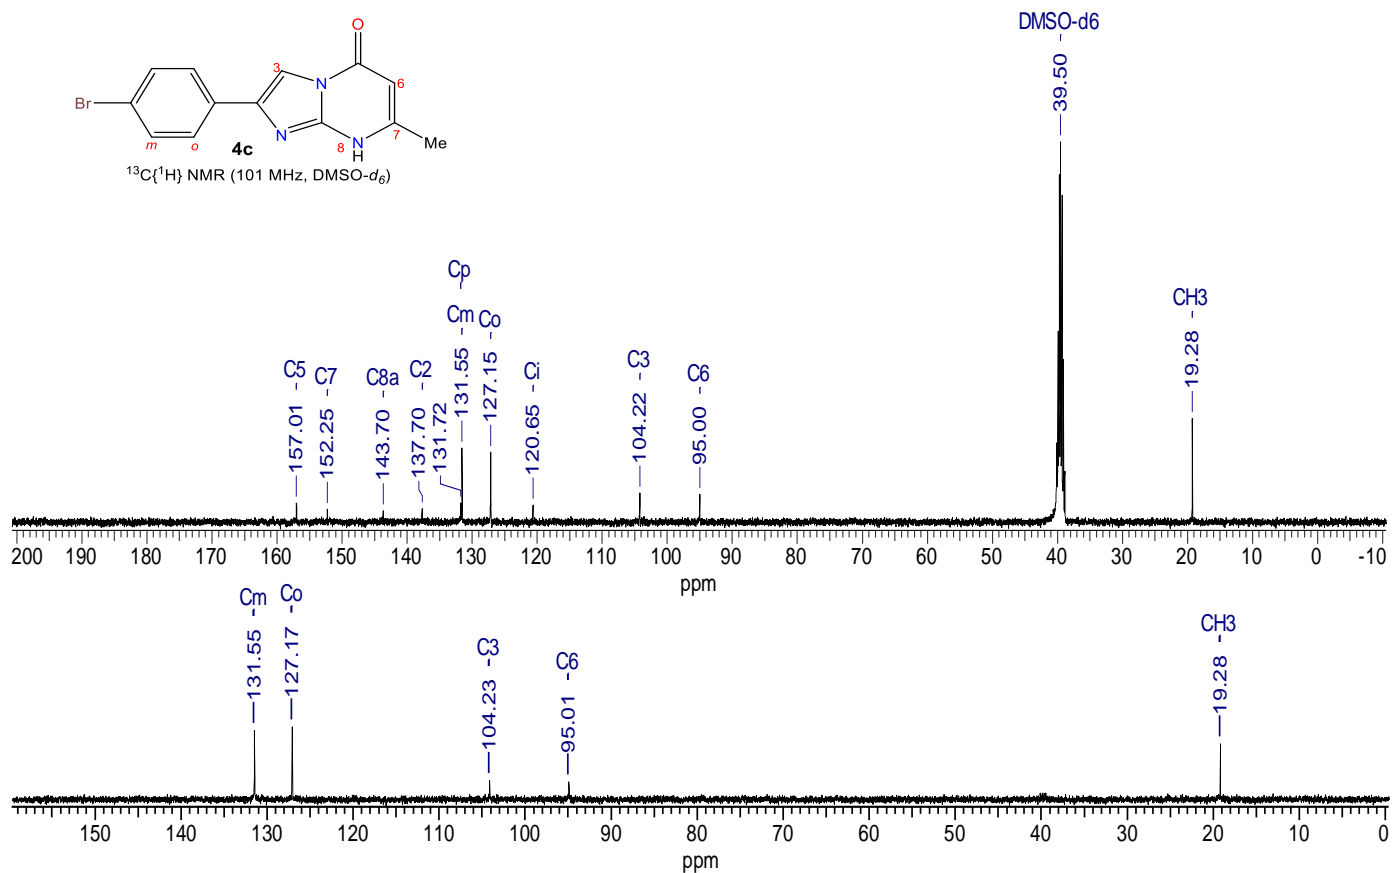

**Fig. S6** <sup>1</sup>H and <sup>13</sup>C{<sup>1</sup>H} NMR spectra of 2-(4-bromophenyl)-7-methylimidazo[1,2-*a*]pyrimidin-5(8*H*)-one (**4c**)

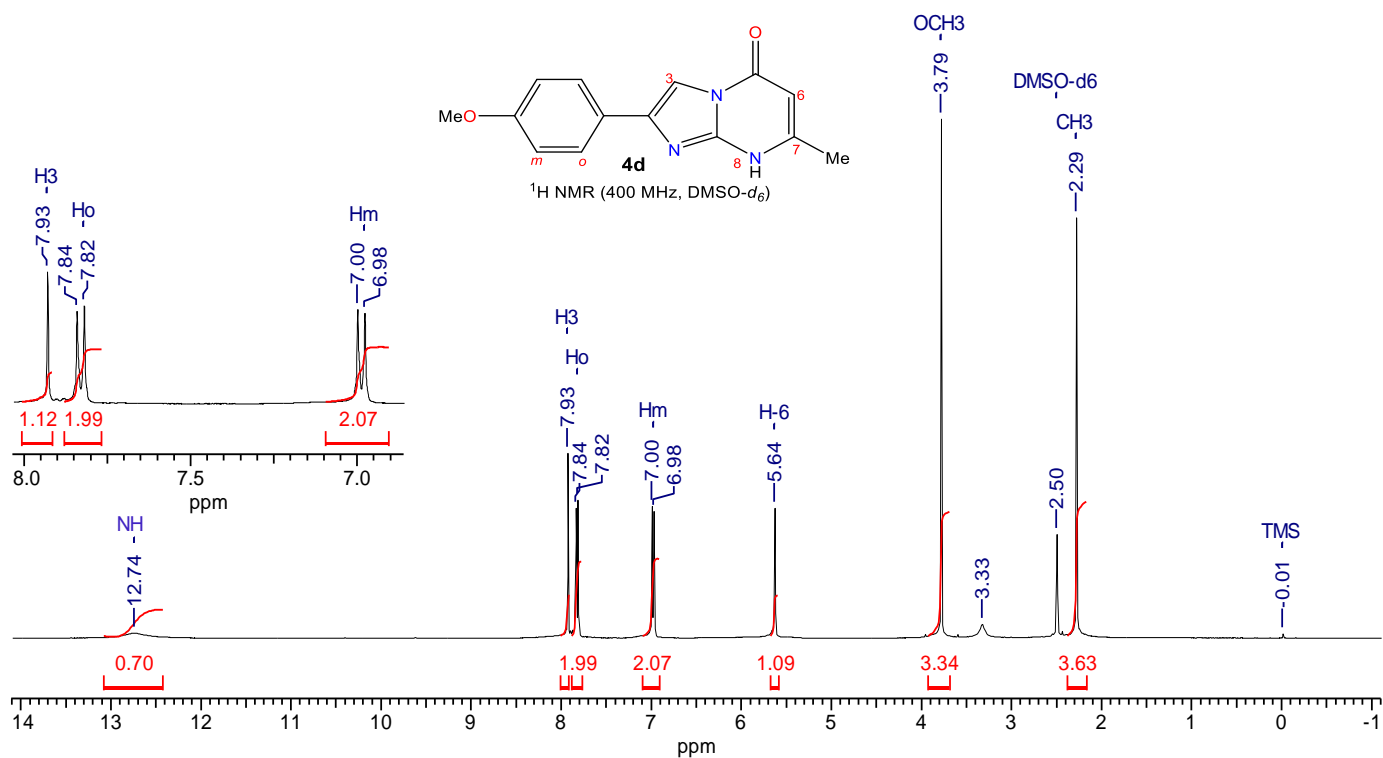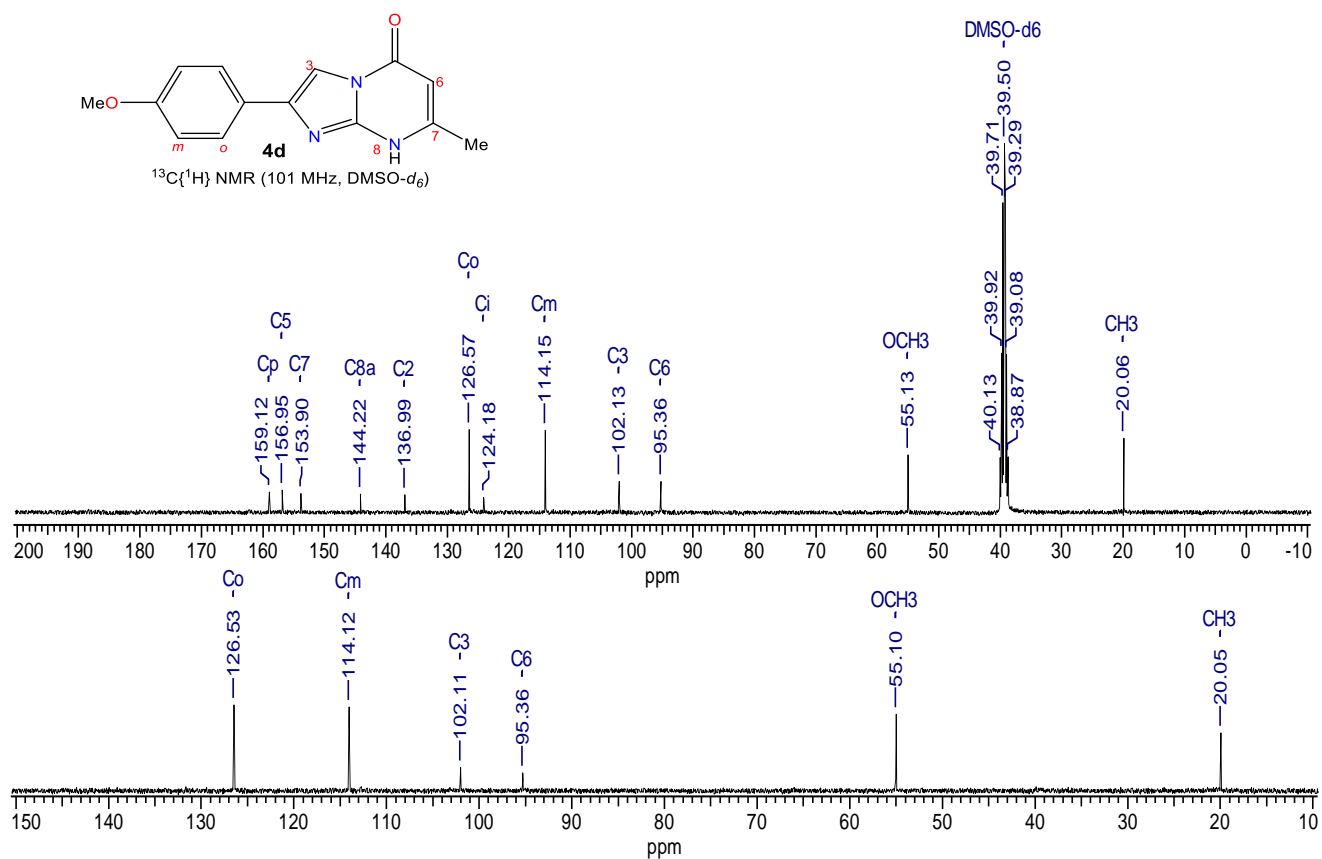

**Fig. S7** <sup>1</sup>H and <sup>13</sup>C{<sup>1</sup>H} NMR spectra of 2-(4-methoxyphenyl)-7-methylimidazo[1,2-a]pyrimidin-5(8H)-one (**4d**)



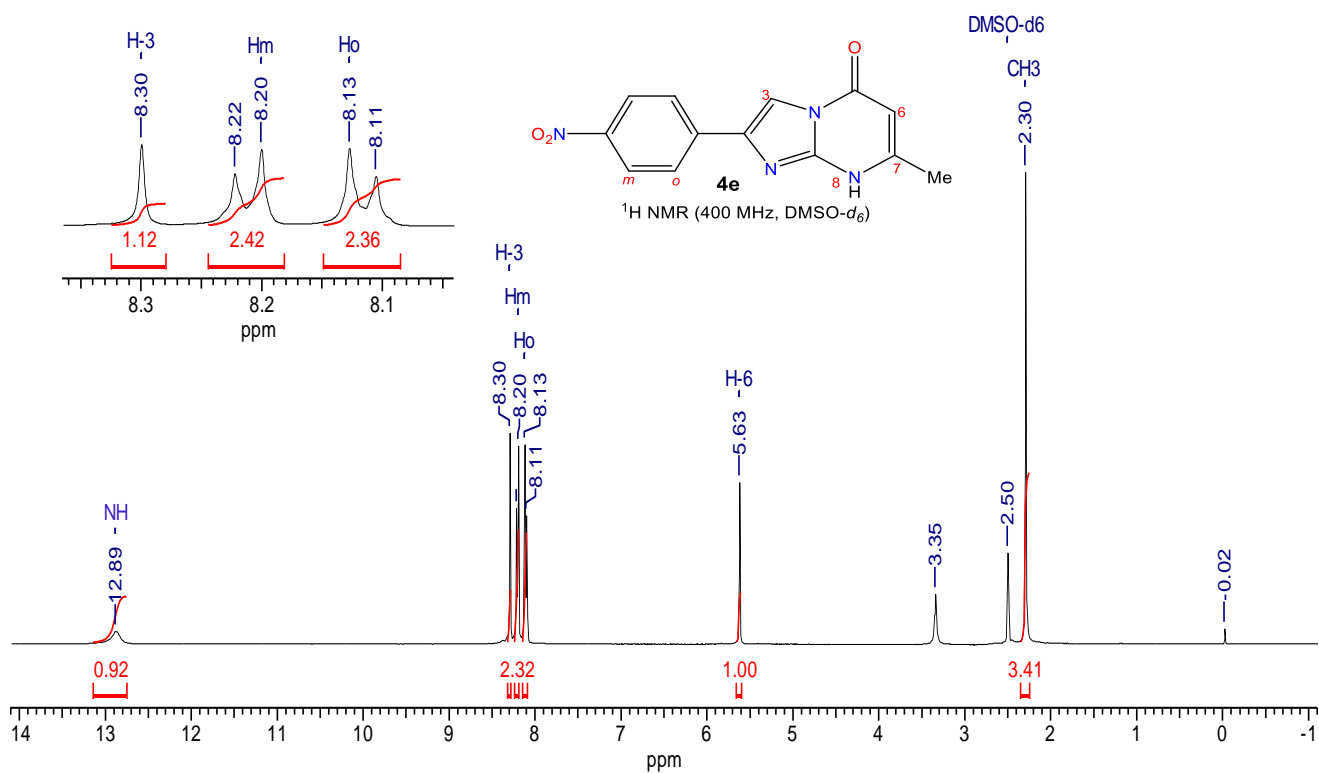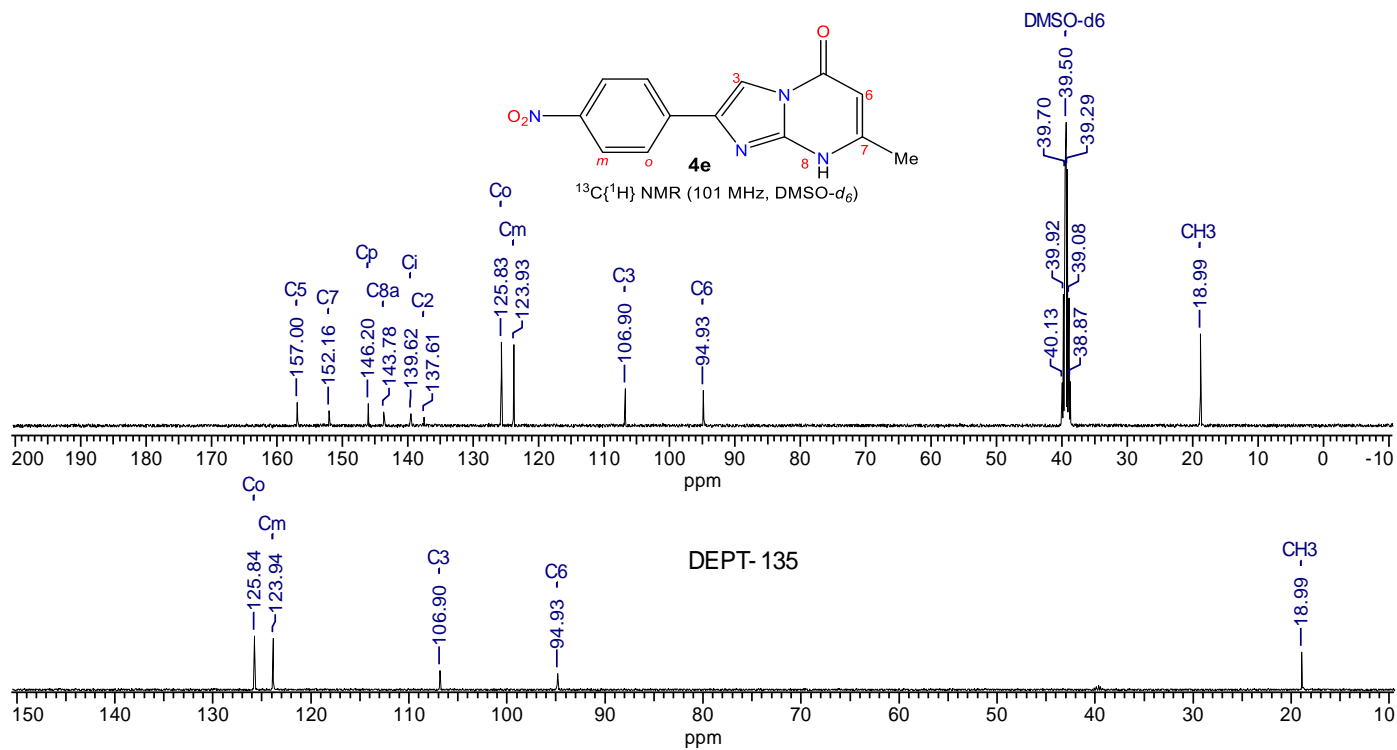

**Fig. S8** <sup>1</sup>H and <sup>13</sup>C{<sup>1</sup>H} NMR spectra of 7-methyl-2-(4-nitrophenyl)imidazo[1,2-*a*]pyrimidin-5(8*H*)-one (**4e**)

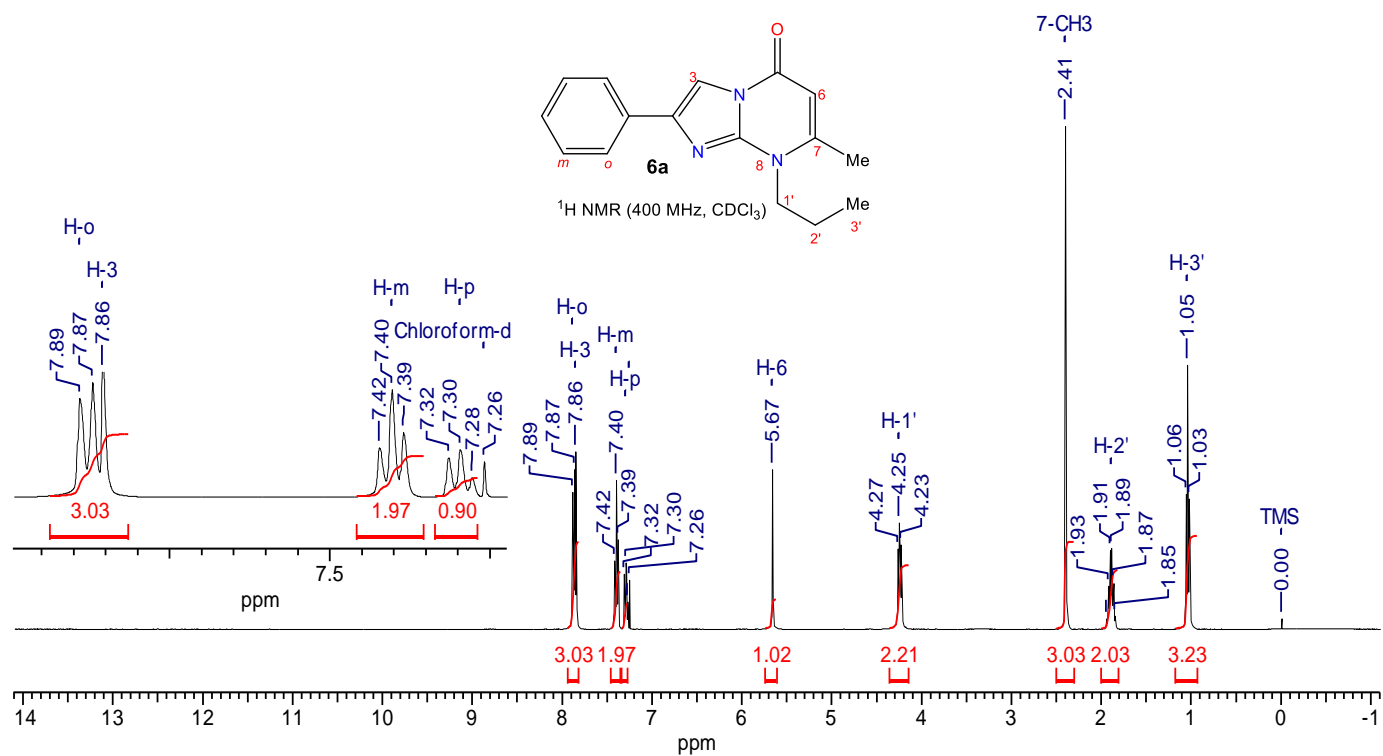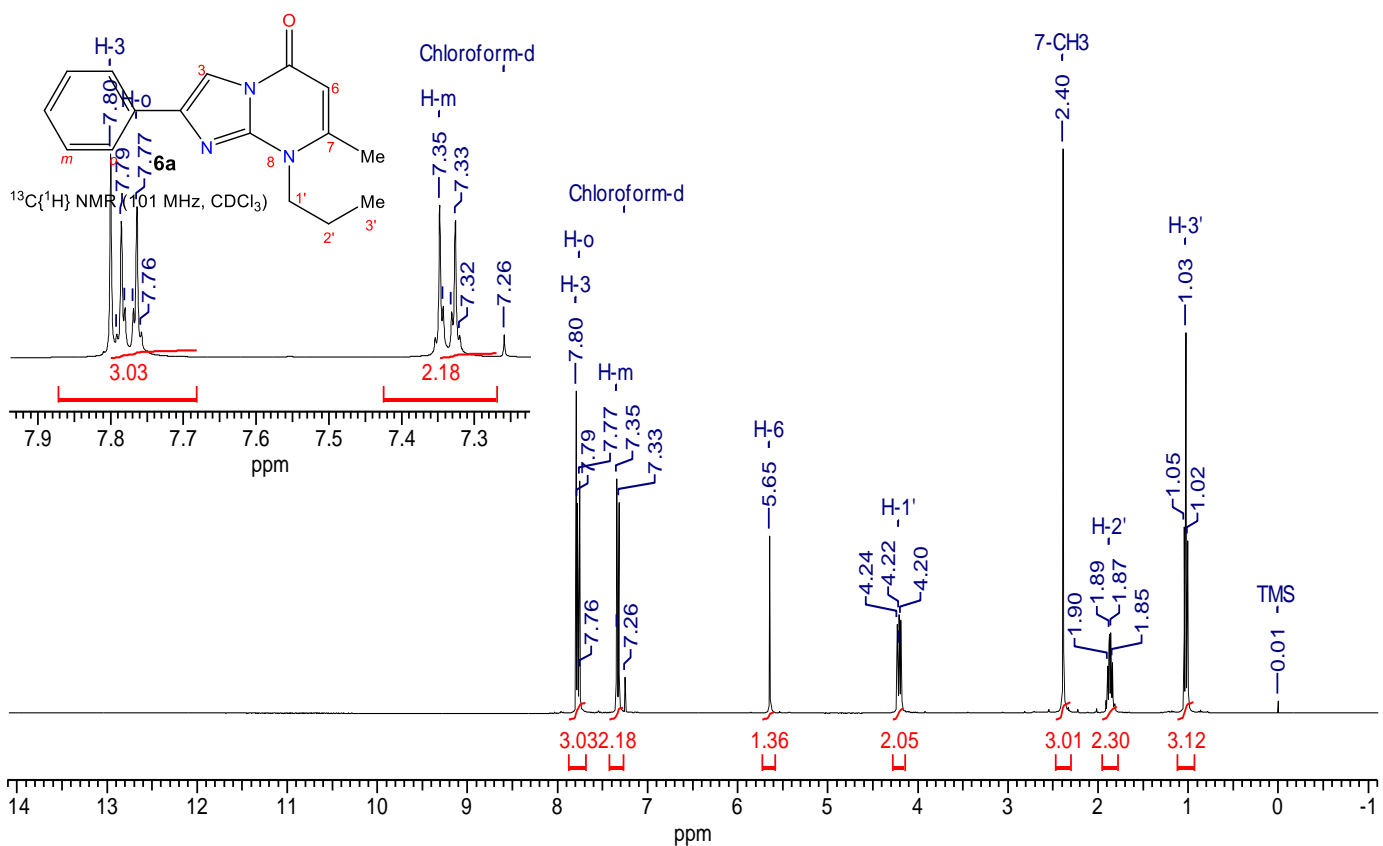

**Fig. S9** <sup>1</sup>H and <sup>13</sup>C{<sup>1</sup>H} NMR spectra of 7-methyl-2-phenyl-8-propylimidazo[1,2-a]pyrimidin-5(8H)-one (6a)

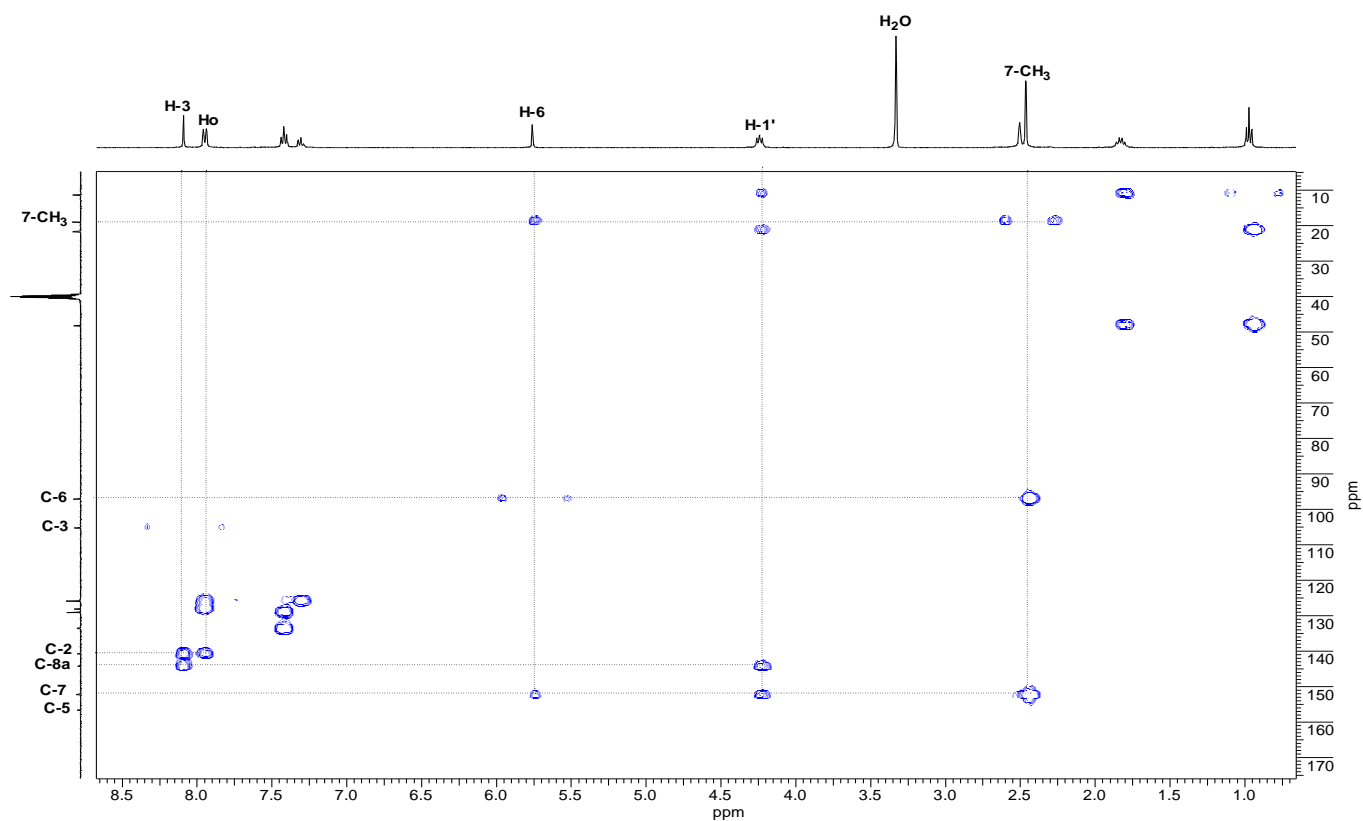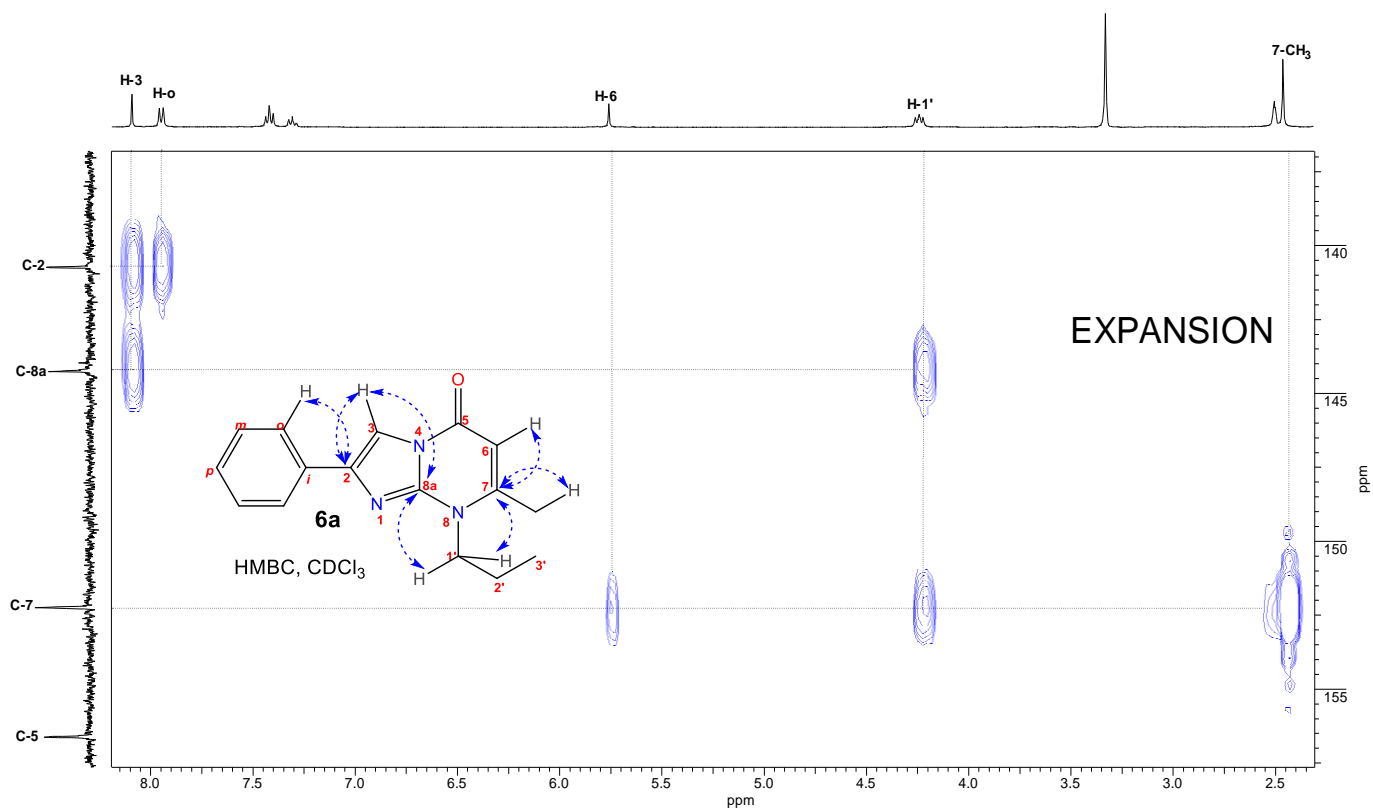

Fig. S10 HMBC spectra of 7-methyl-2-phenyl-8-propylimidazo[1,2-*a*]pyrimidin-5(8*H*)-one (6a)

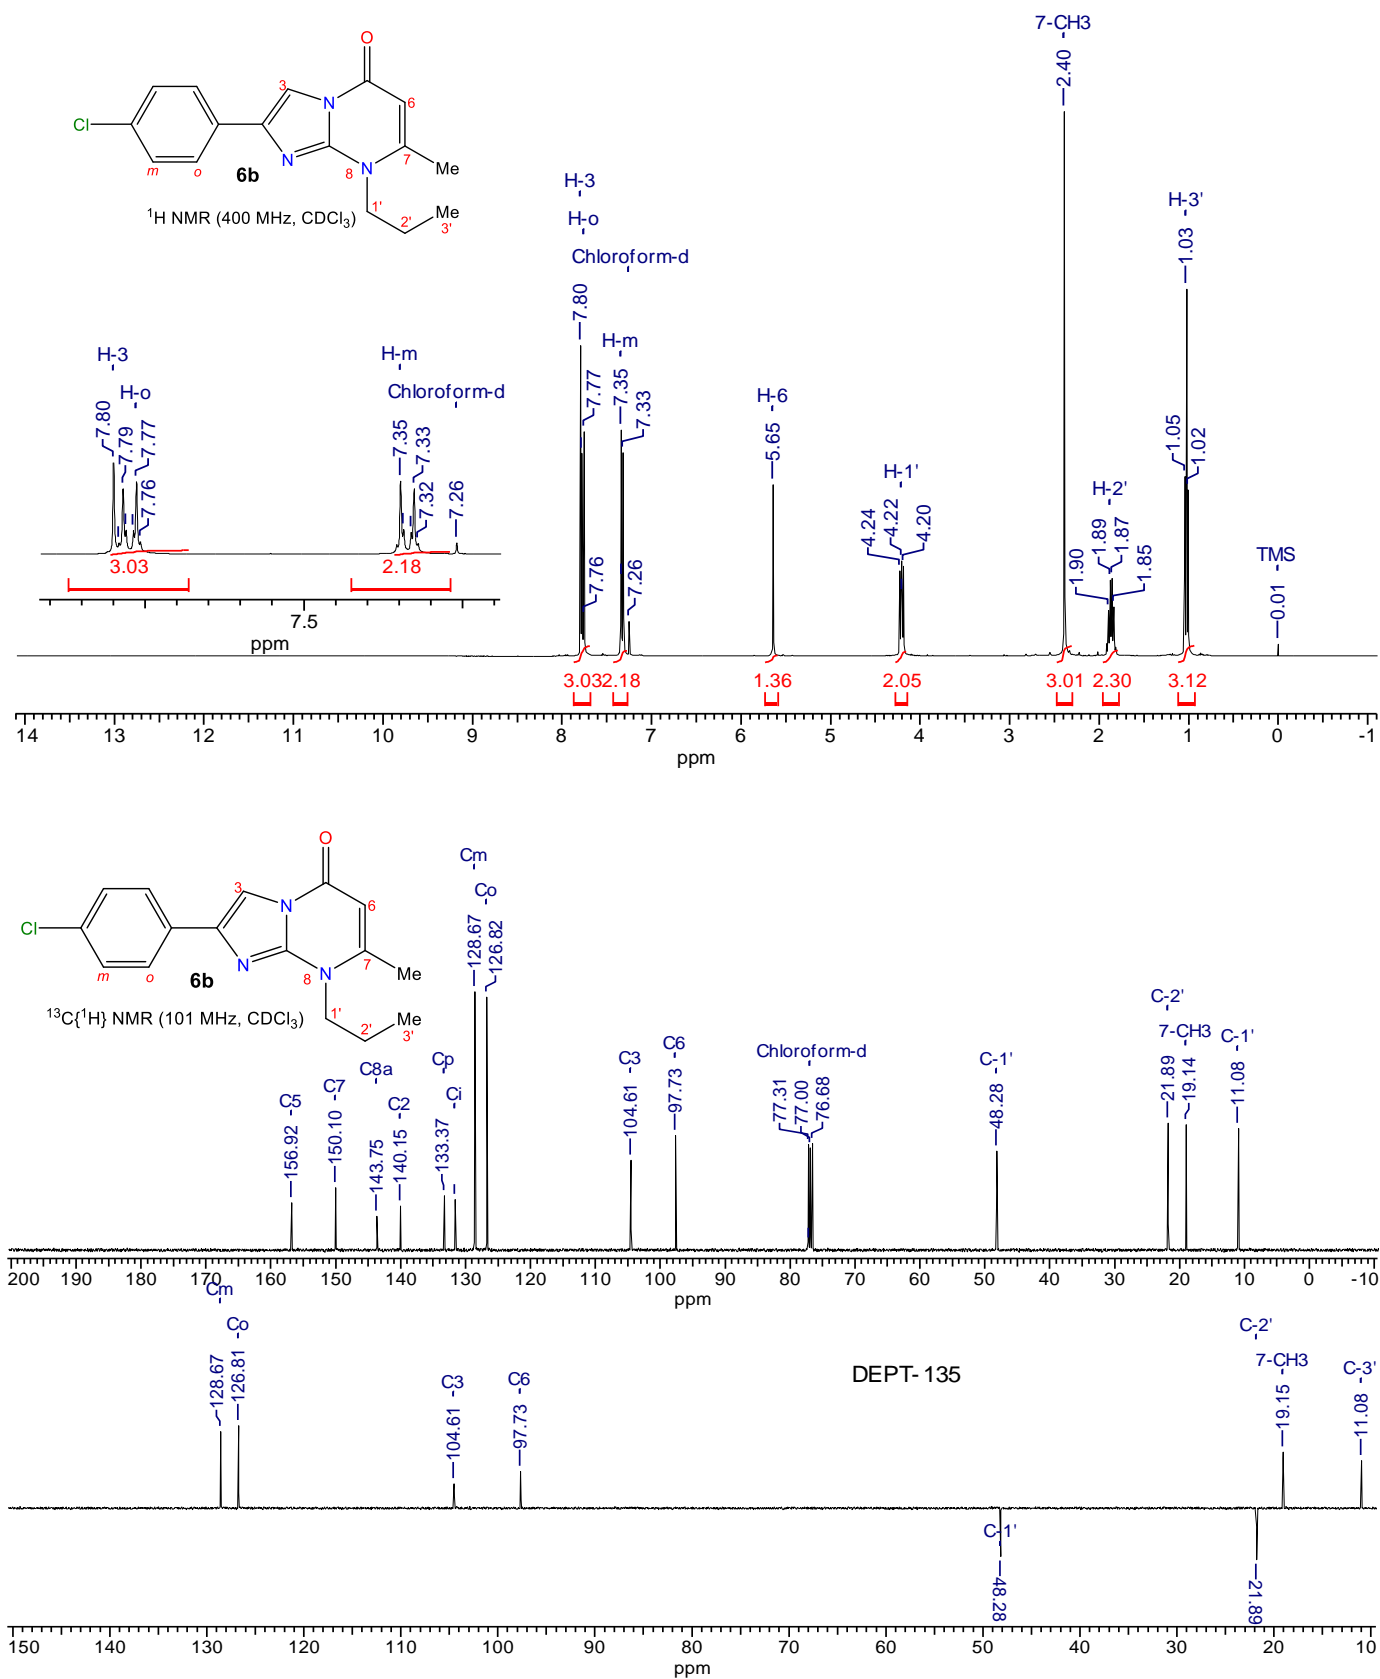

**Fig. S11** <sup>1</sup>H and <sup>13</sup>C{<sup>1</sup>H} NMR spectra of 2-(4-chlorophenyl)-7-methyl-8-propylimidazo[1,2-a]pyrimidin-5-one (**6b**)

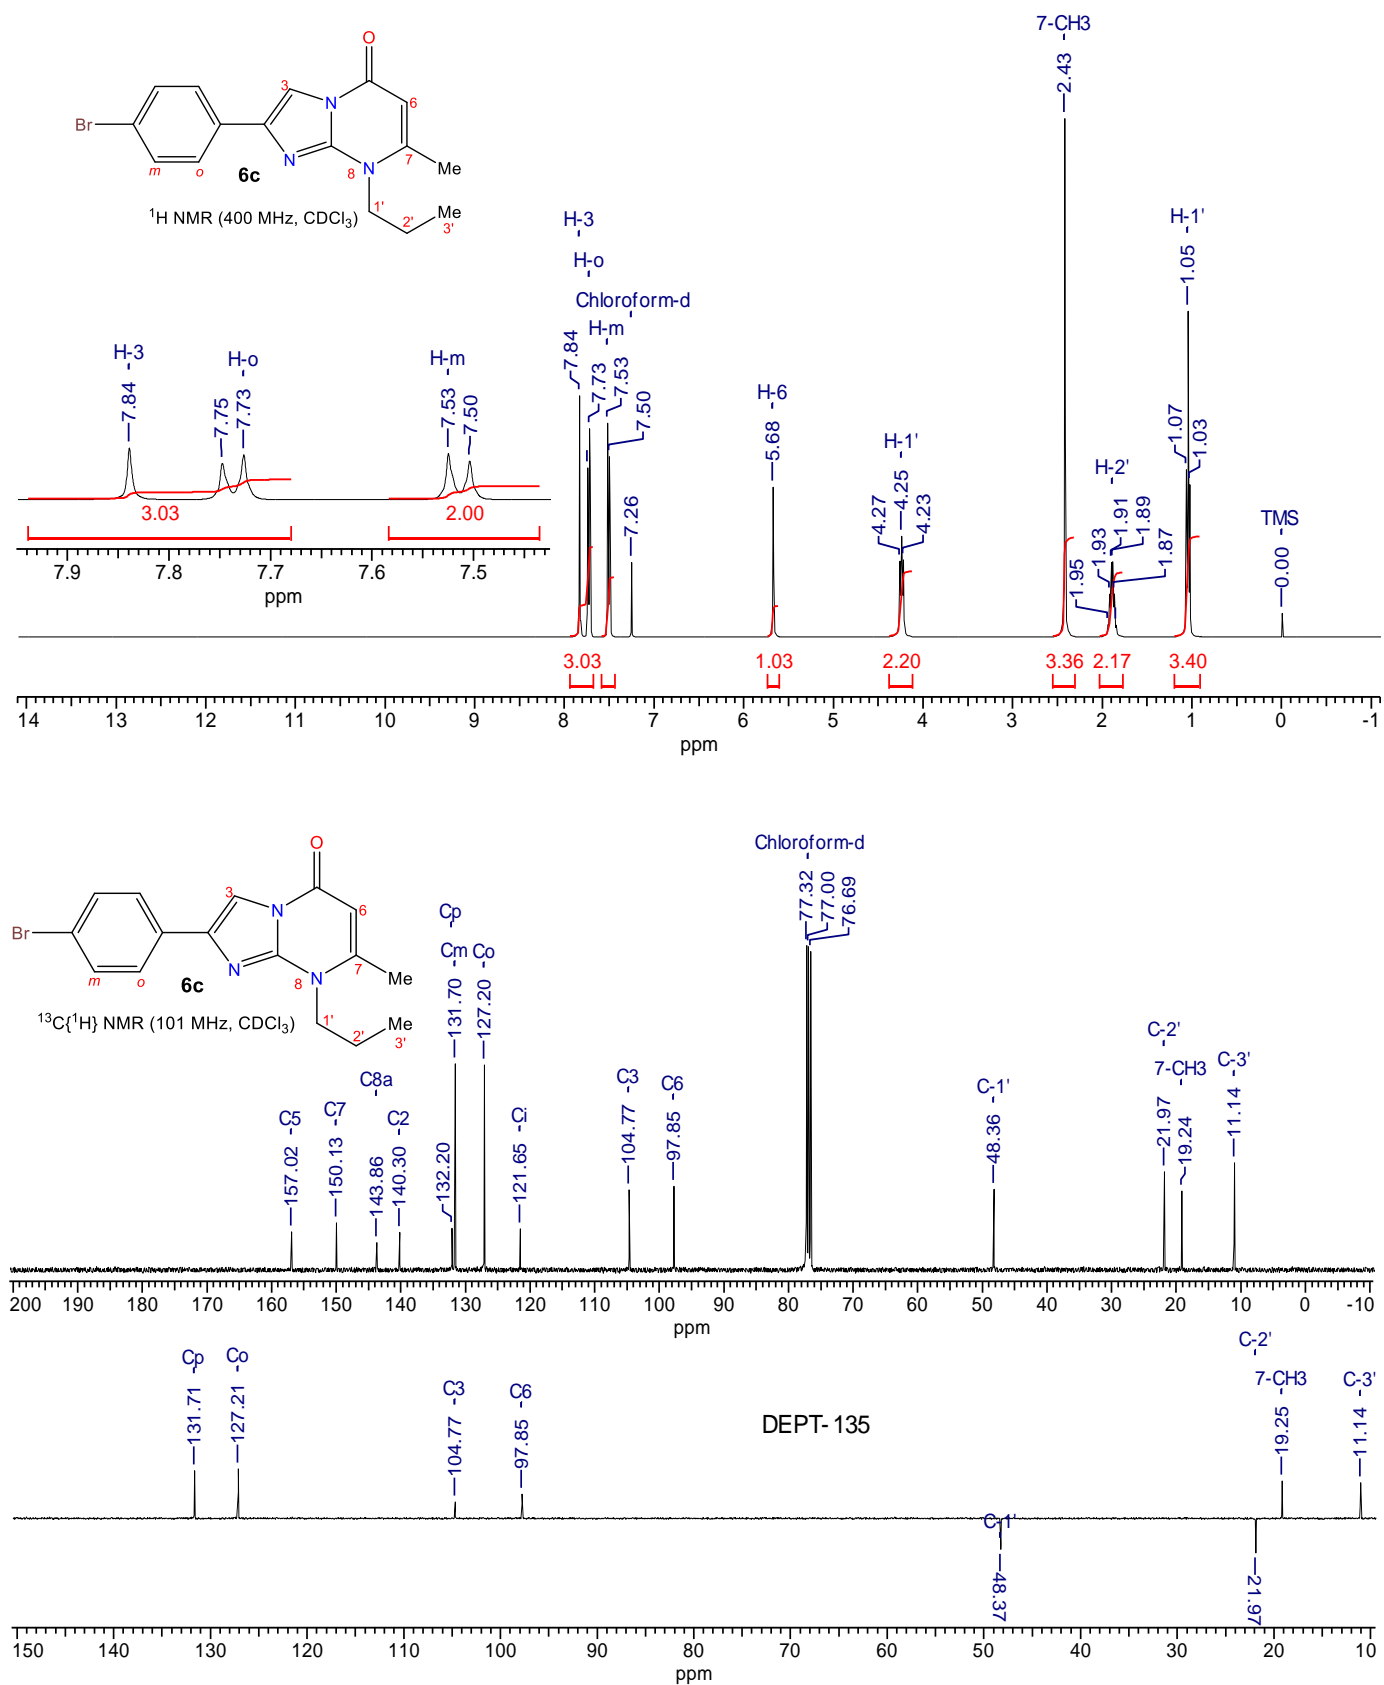

**Fig. S12**  $^1\text{H}$  and  $^{13}\text{C}\{^1\text{H}\}$  NMR spectra of 2-(4-bromophenyl)-7-methyl-8-propylimidazo[1,2-*a*]pyrimidin-5-one (**6c**)

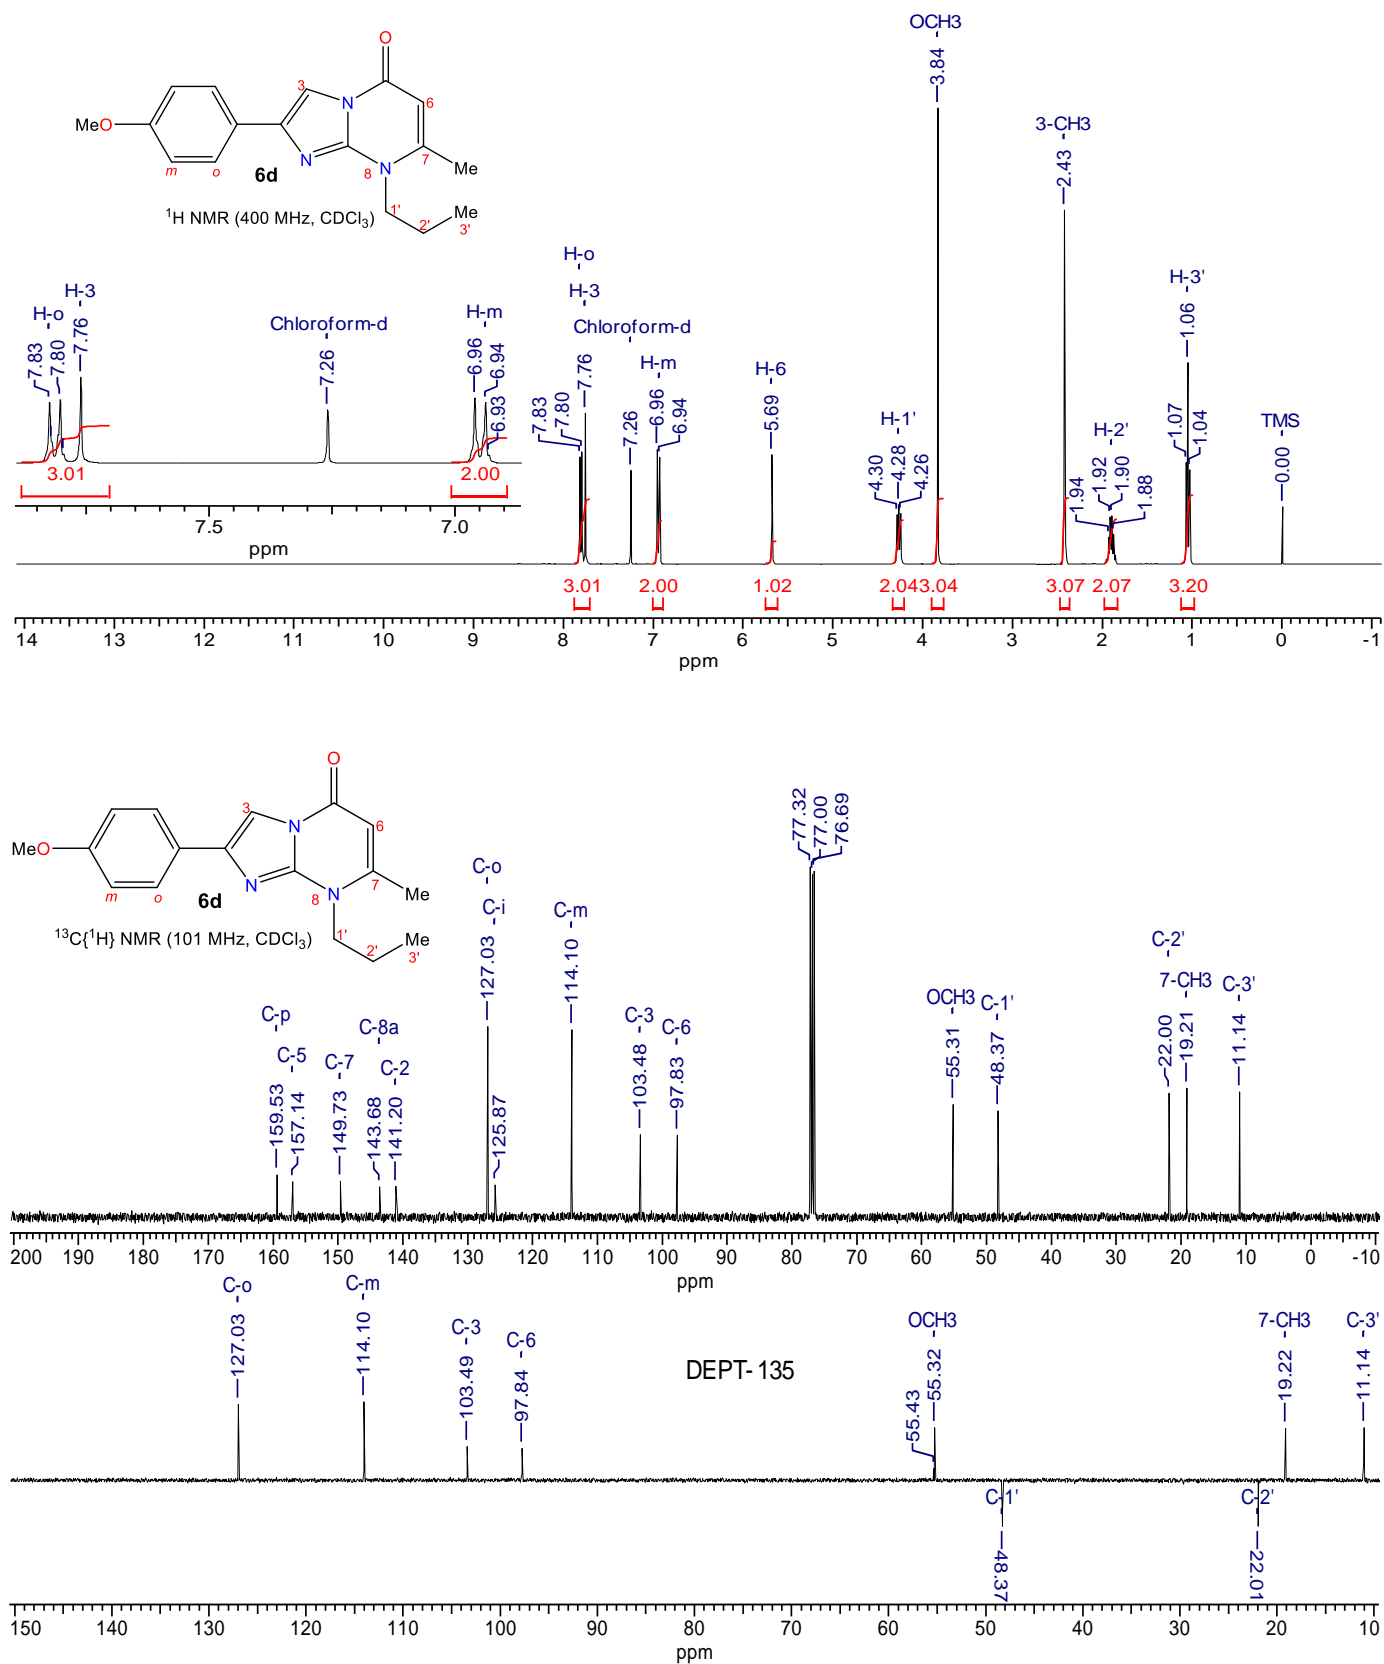

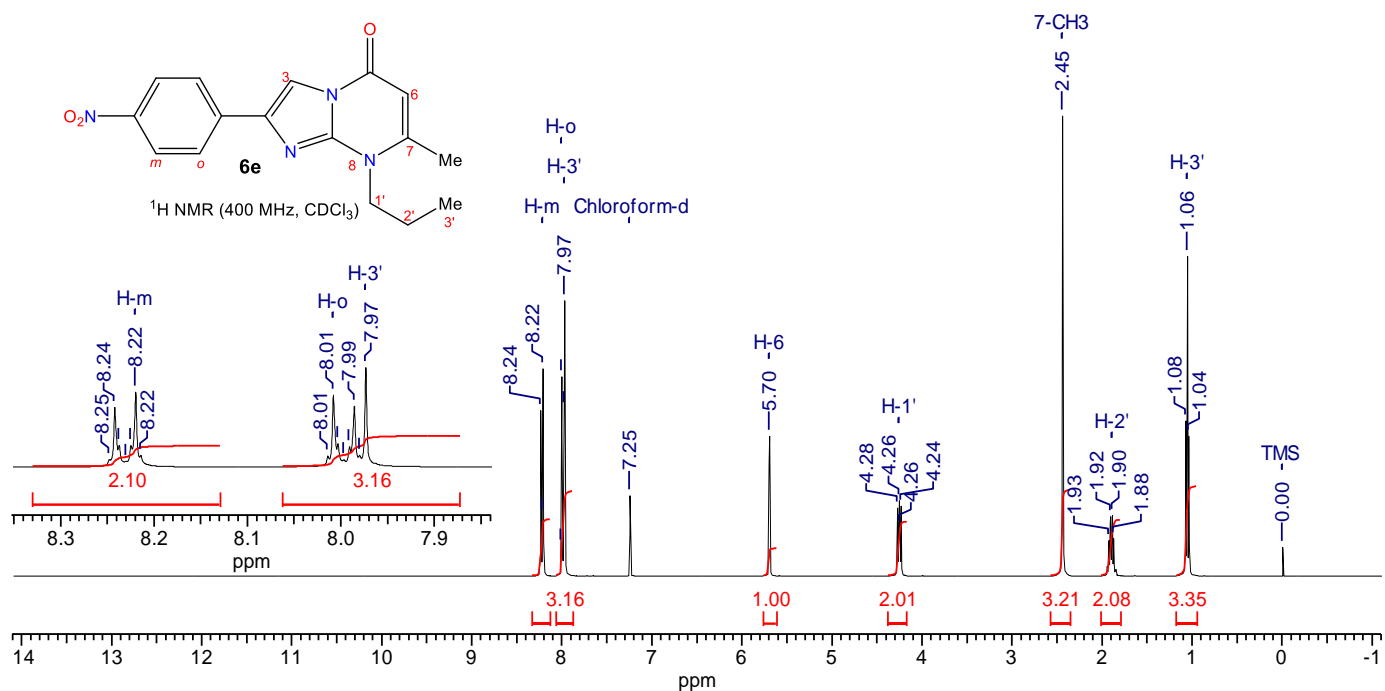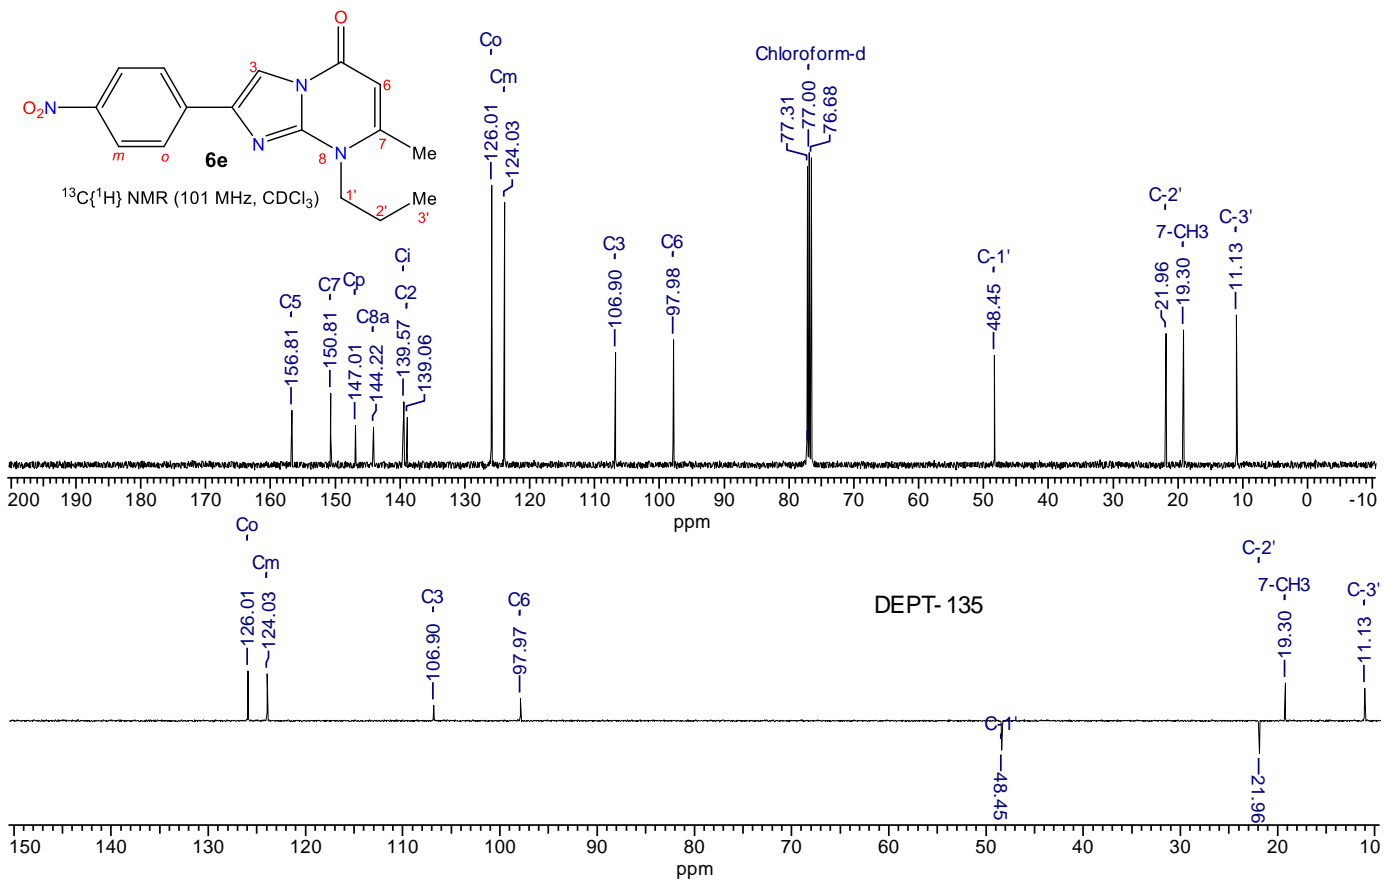

**Fig. S14**  $^1\text{H}$  and  $^{13}\text{C}\{^1\text{H}\}$  NMR spectra of 7-methyl-2-(4-nitrophenyl)-8-propylimidazo[1,2-*a*]pyrimidin-5(8*H*)-one (**6e**)

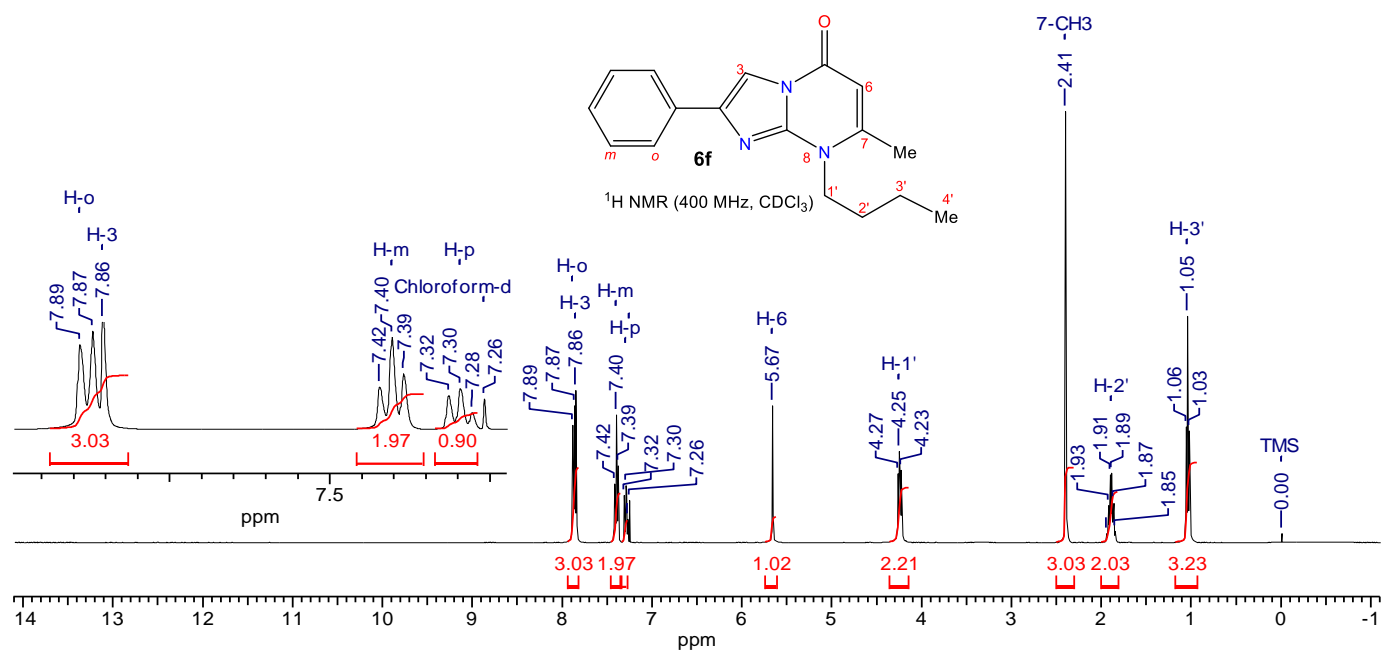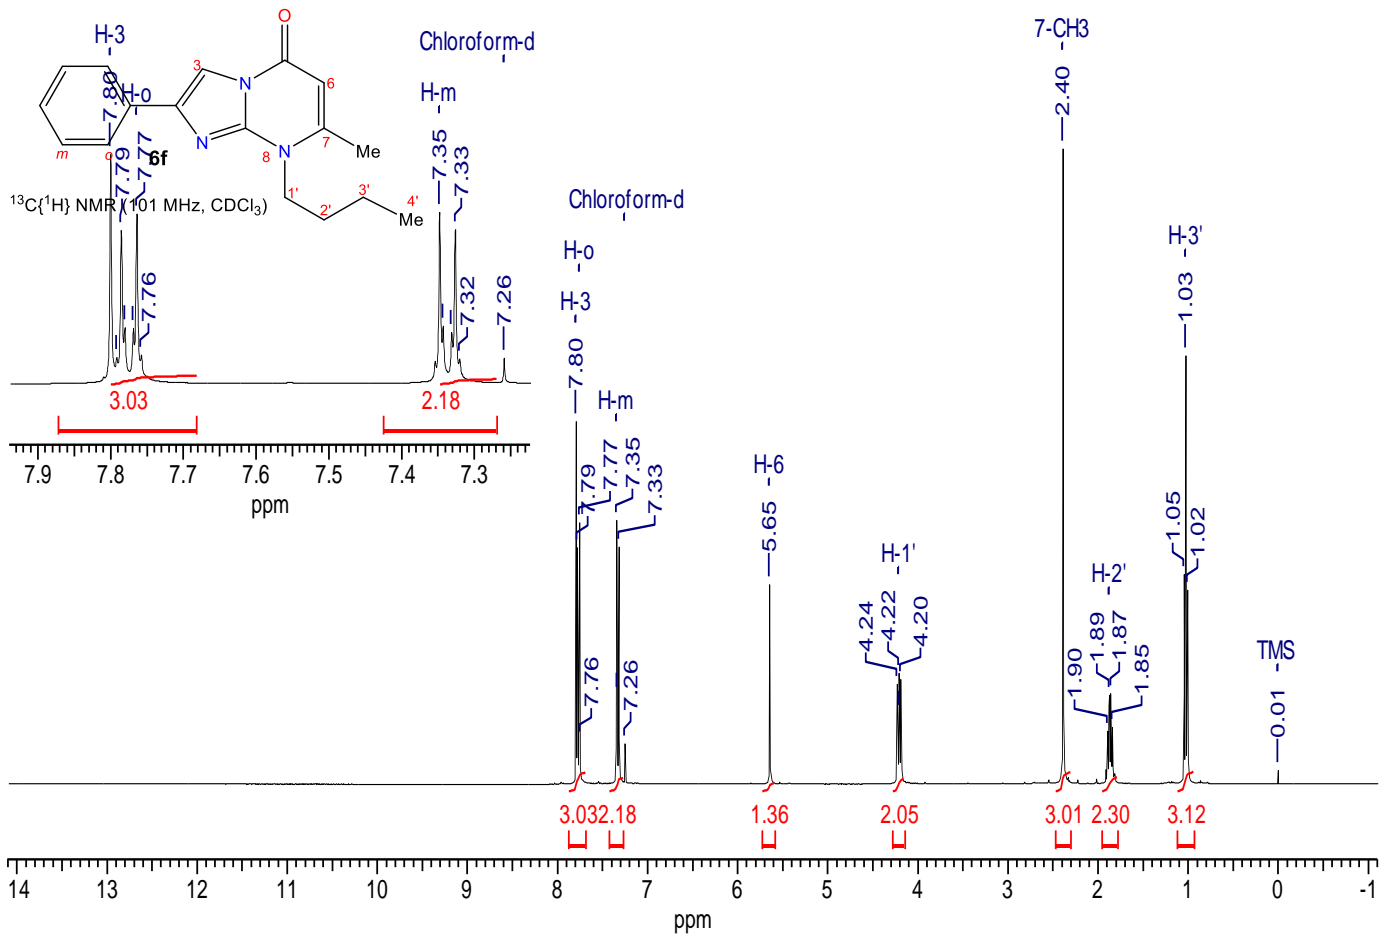

**Fig. S15** <sup>1</sup>H and <sup>13</sup>C{<sup>1</sup>H} NMR spectra of 8-butyl-7-methyl-2-phenylimidazo[1,2-a]pyrimidin-5(8H)-one (**6f**)



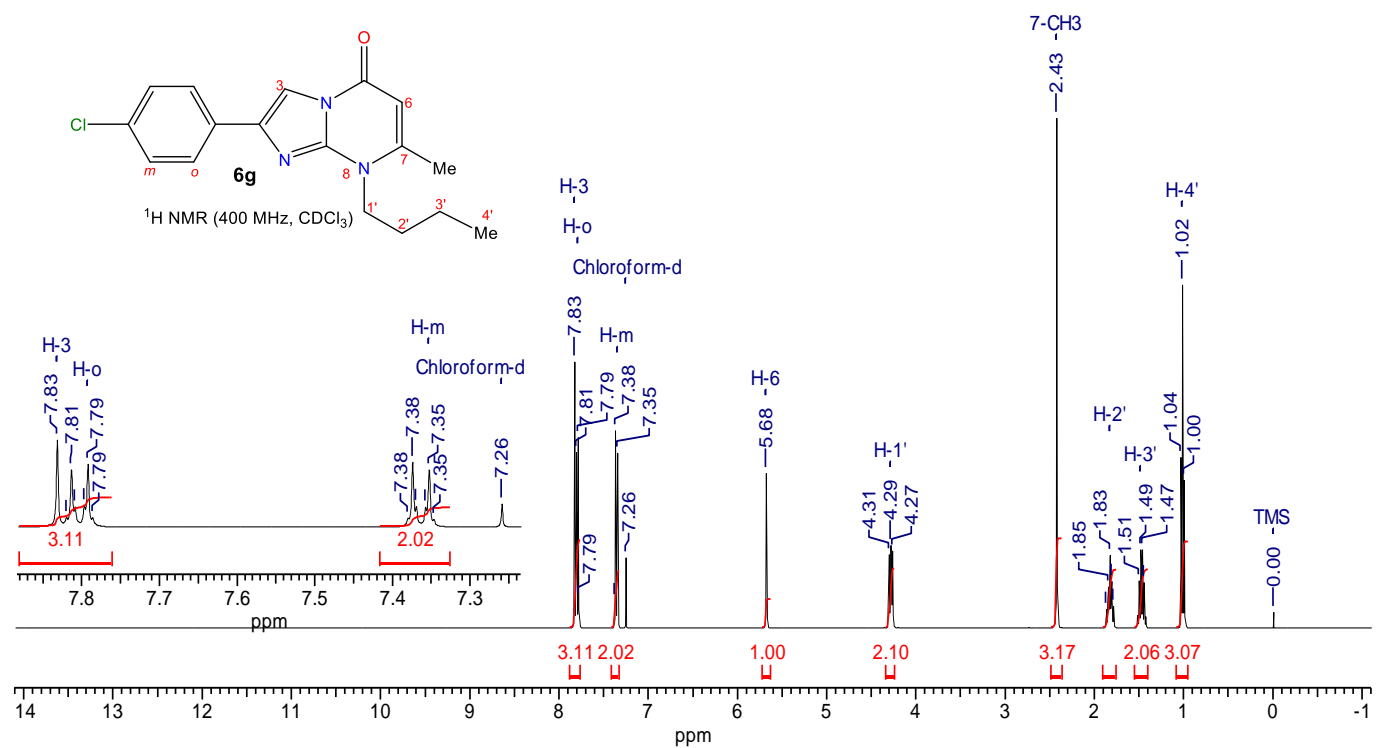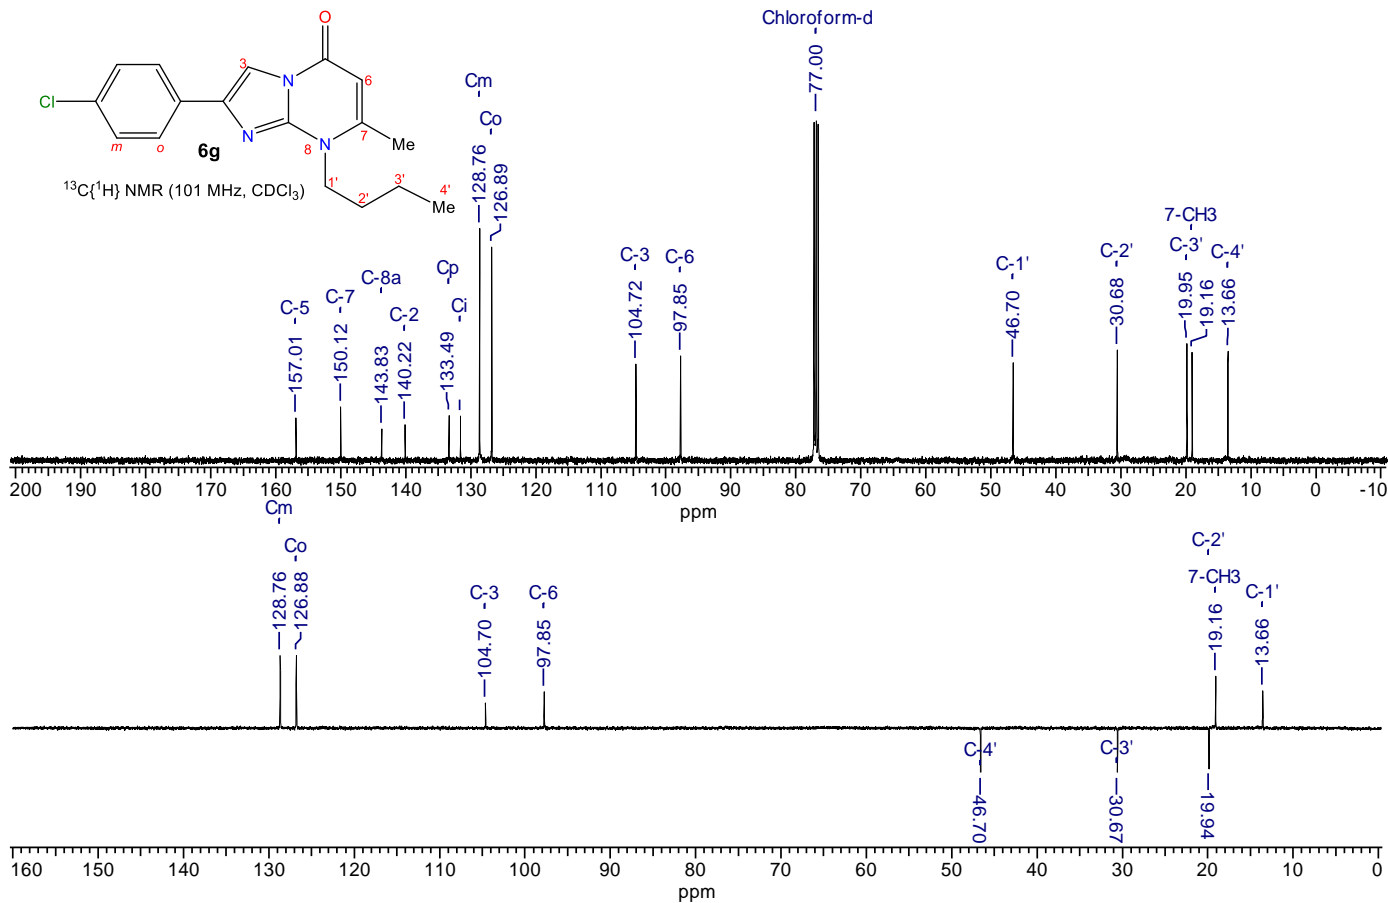

**Fig. S16** <sup>1</sup>H and <sup>13</sup>C{<sup>1</sup>H} NMR spectra of 8-butyl-2-(4-chlorophenyl)-7-methylimidazo[1,2-*a*]pyrimidin-5(8*H*)-one (**6g**)

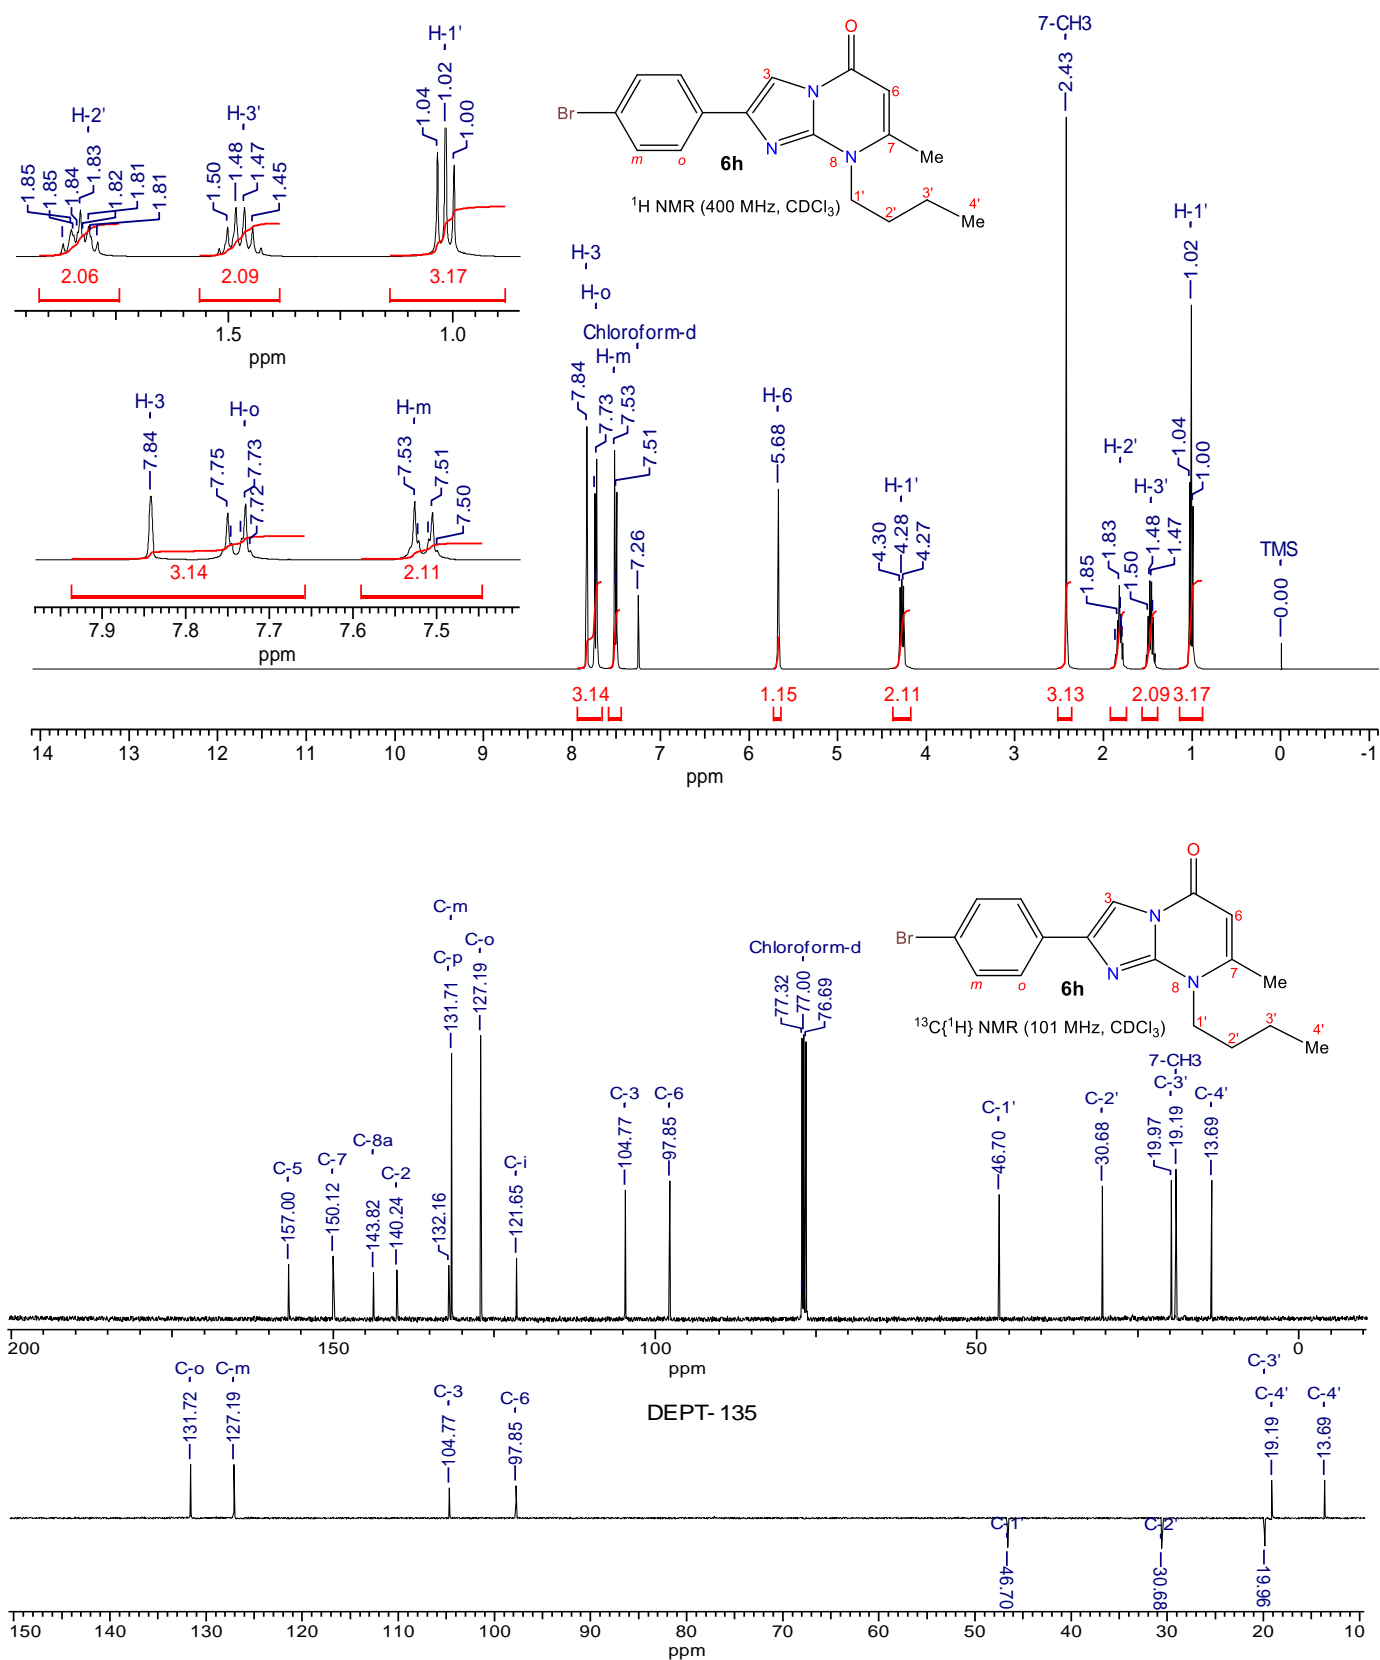

**Fig. S17** <sup>1</sup>H and <sup>13</sup>C{<sup>1</sup>H} NMR spectra of 8-butyl-(4-bromophenyl)-7-methylimidazo[1,2-a]pyrimidin-5(8H)-one (**6h**)

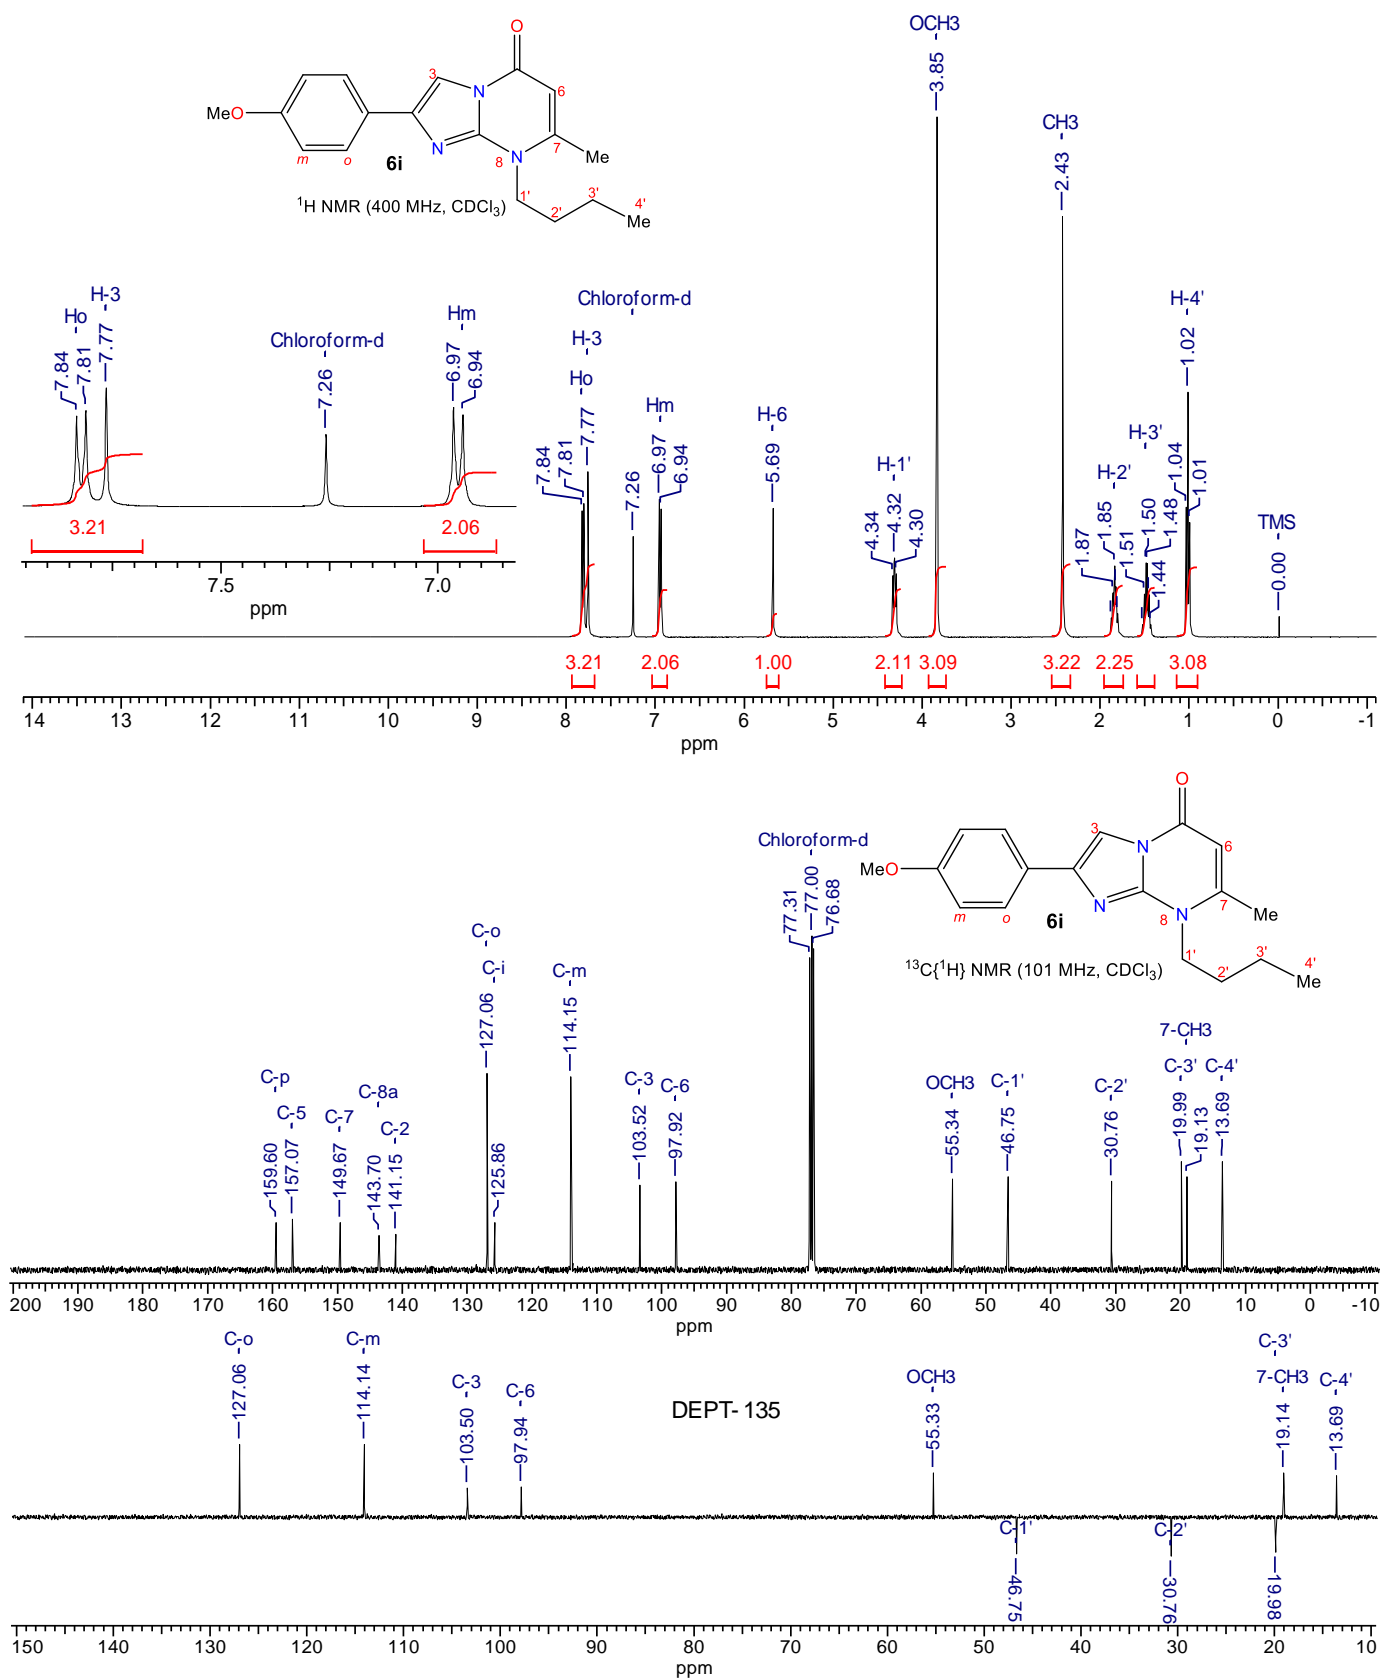

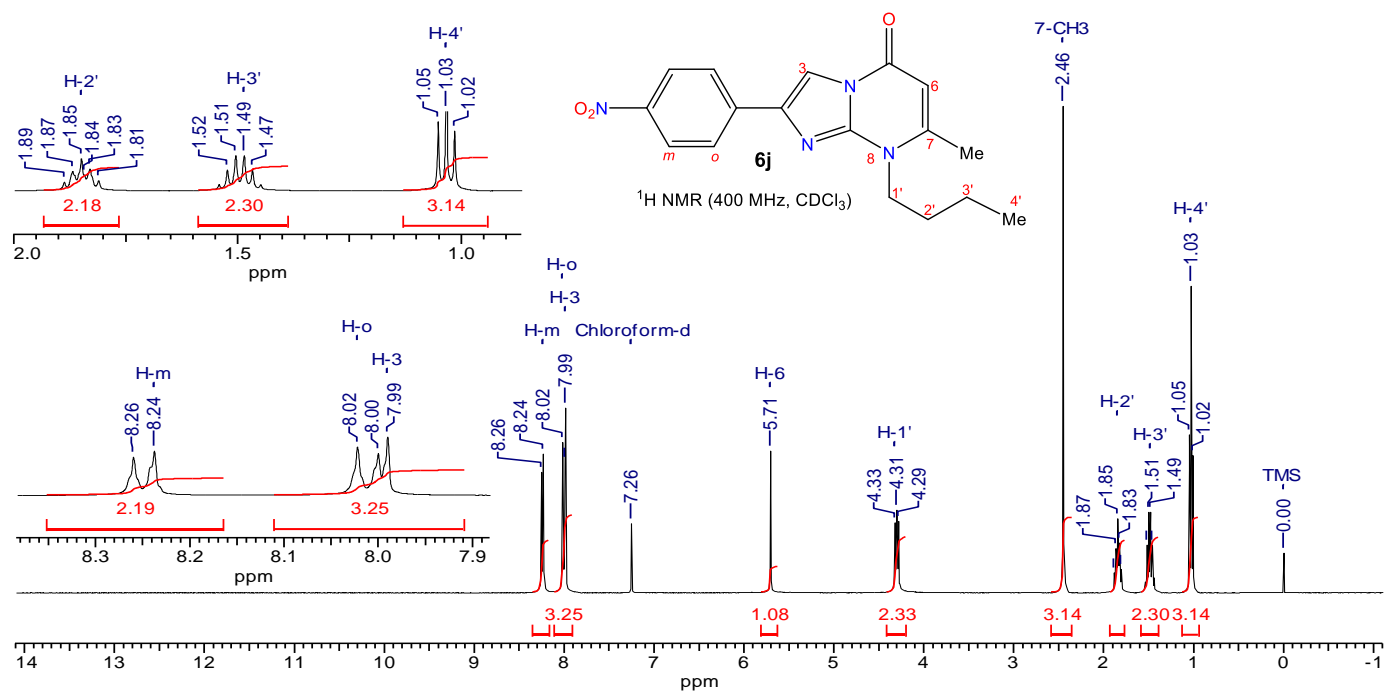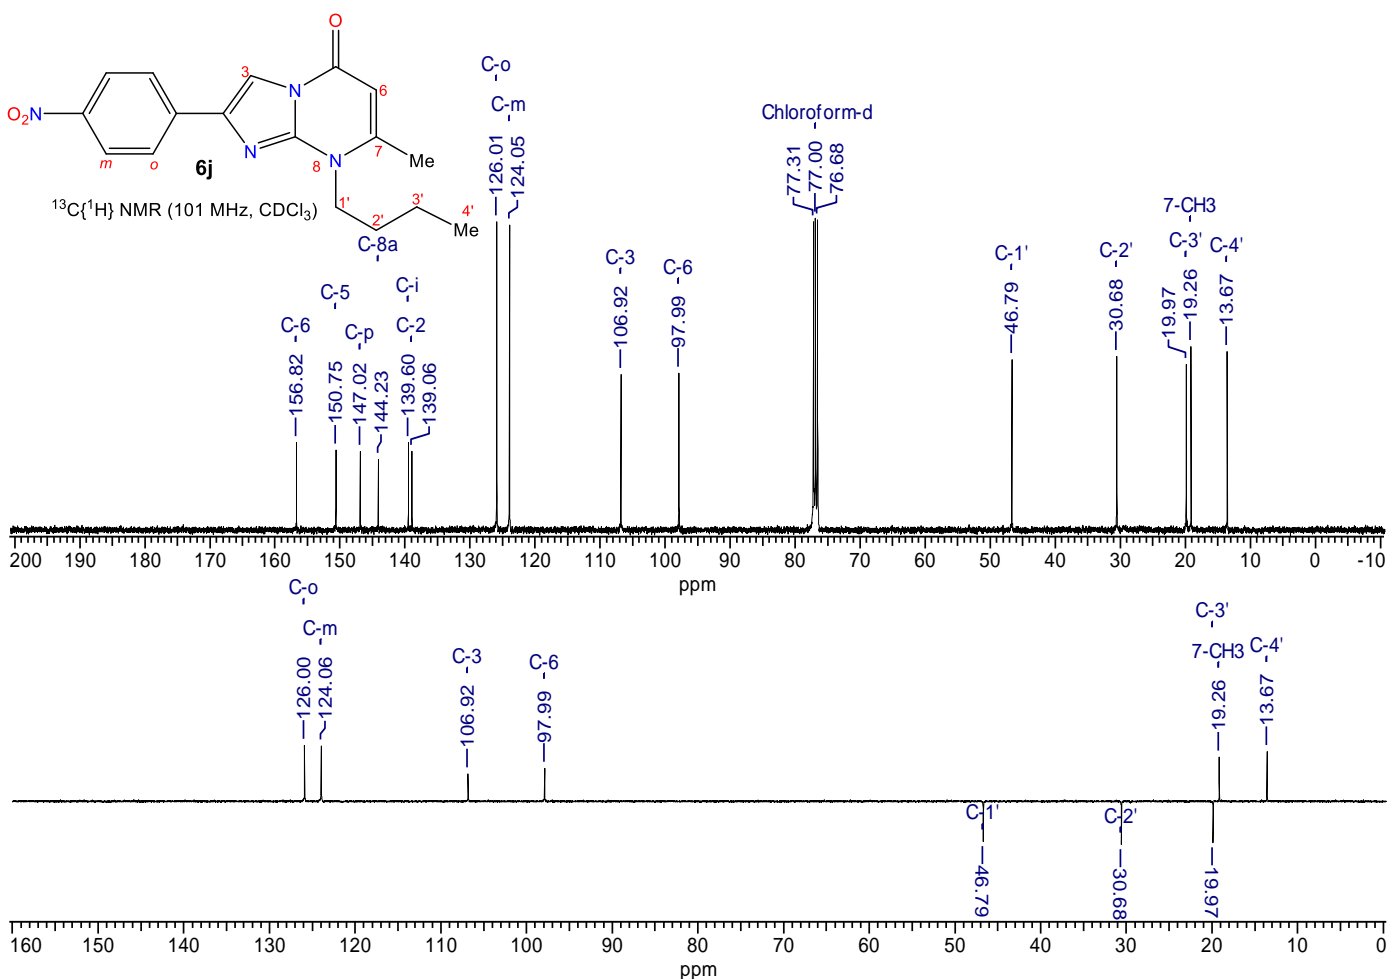

**Fig. S19** <sup>1</sup>H and <sup>13</sup>C{<sup>1</sup>H} NMR spectra of 8-butyl-7-methyl-2-(4-nitrophenyl)imidazo[1,2-a]pyrimidin-5(8H)-one (**6j**)



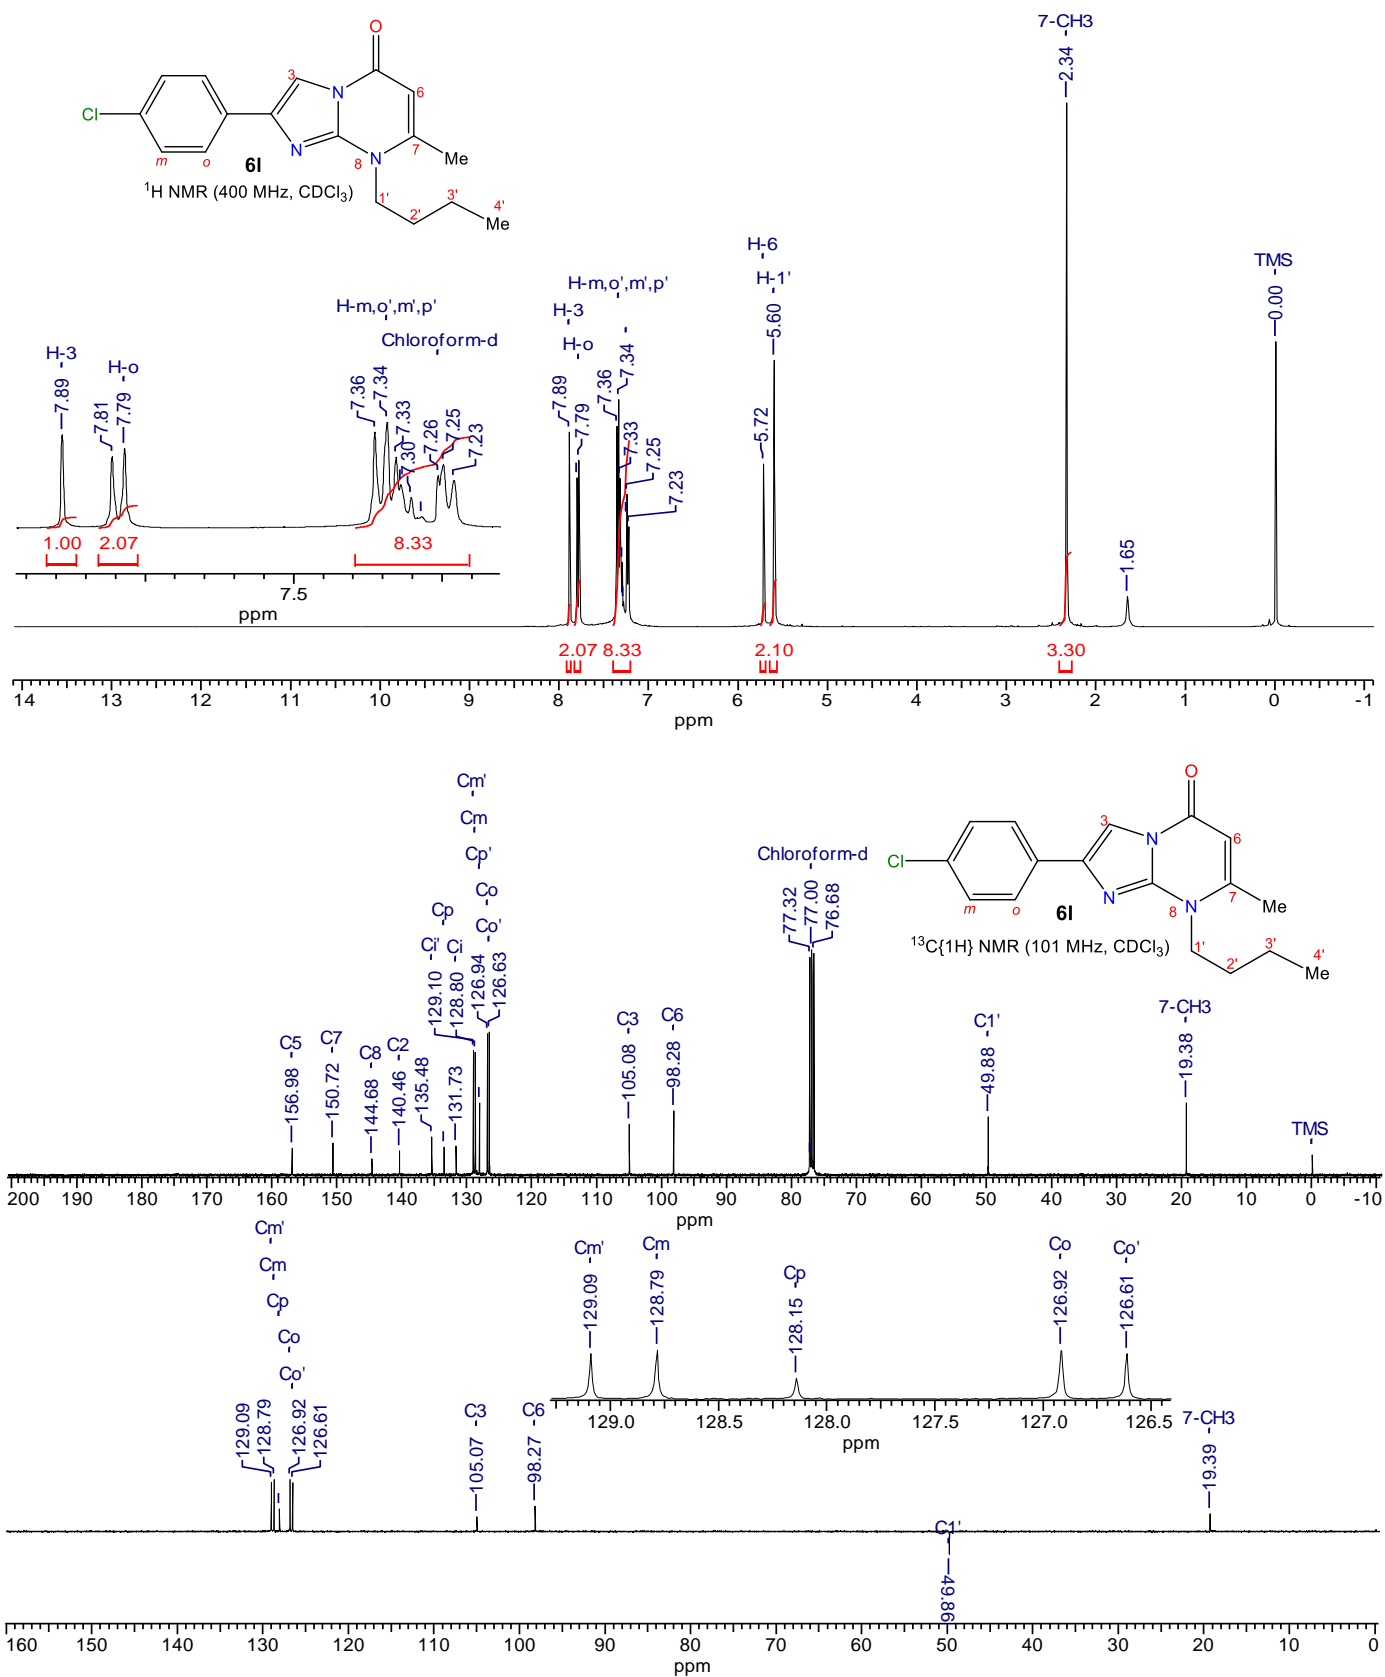

**Fig. S21** <sup>1</sup>H and <sup>13</sup>C{<sup>1</sup>H} NMR spectra of 8-benzyl-2-(4-chlorophenyl)-7-methylimidazo[1,2-a]pyrimidin-5(8H)-one (**41**)

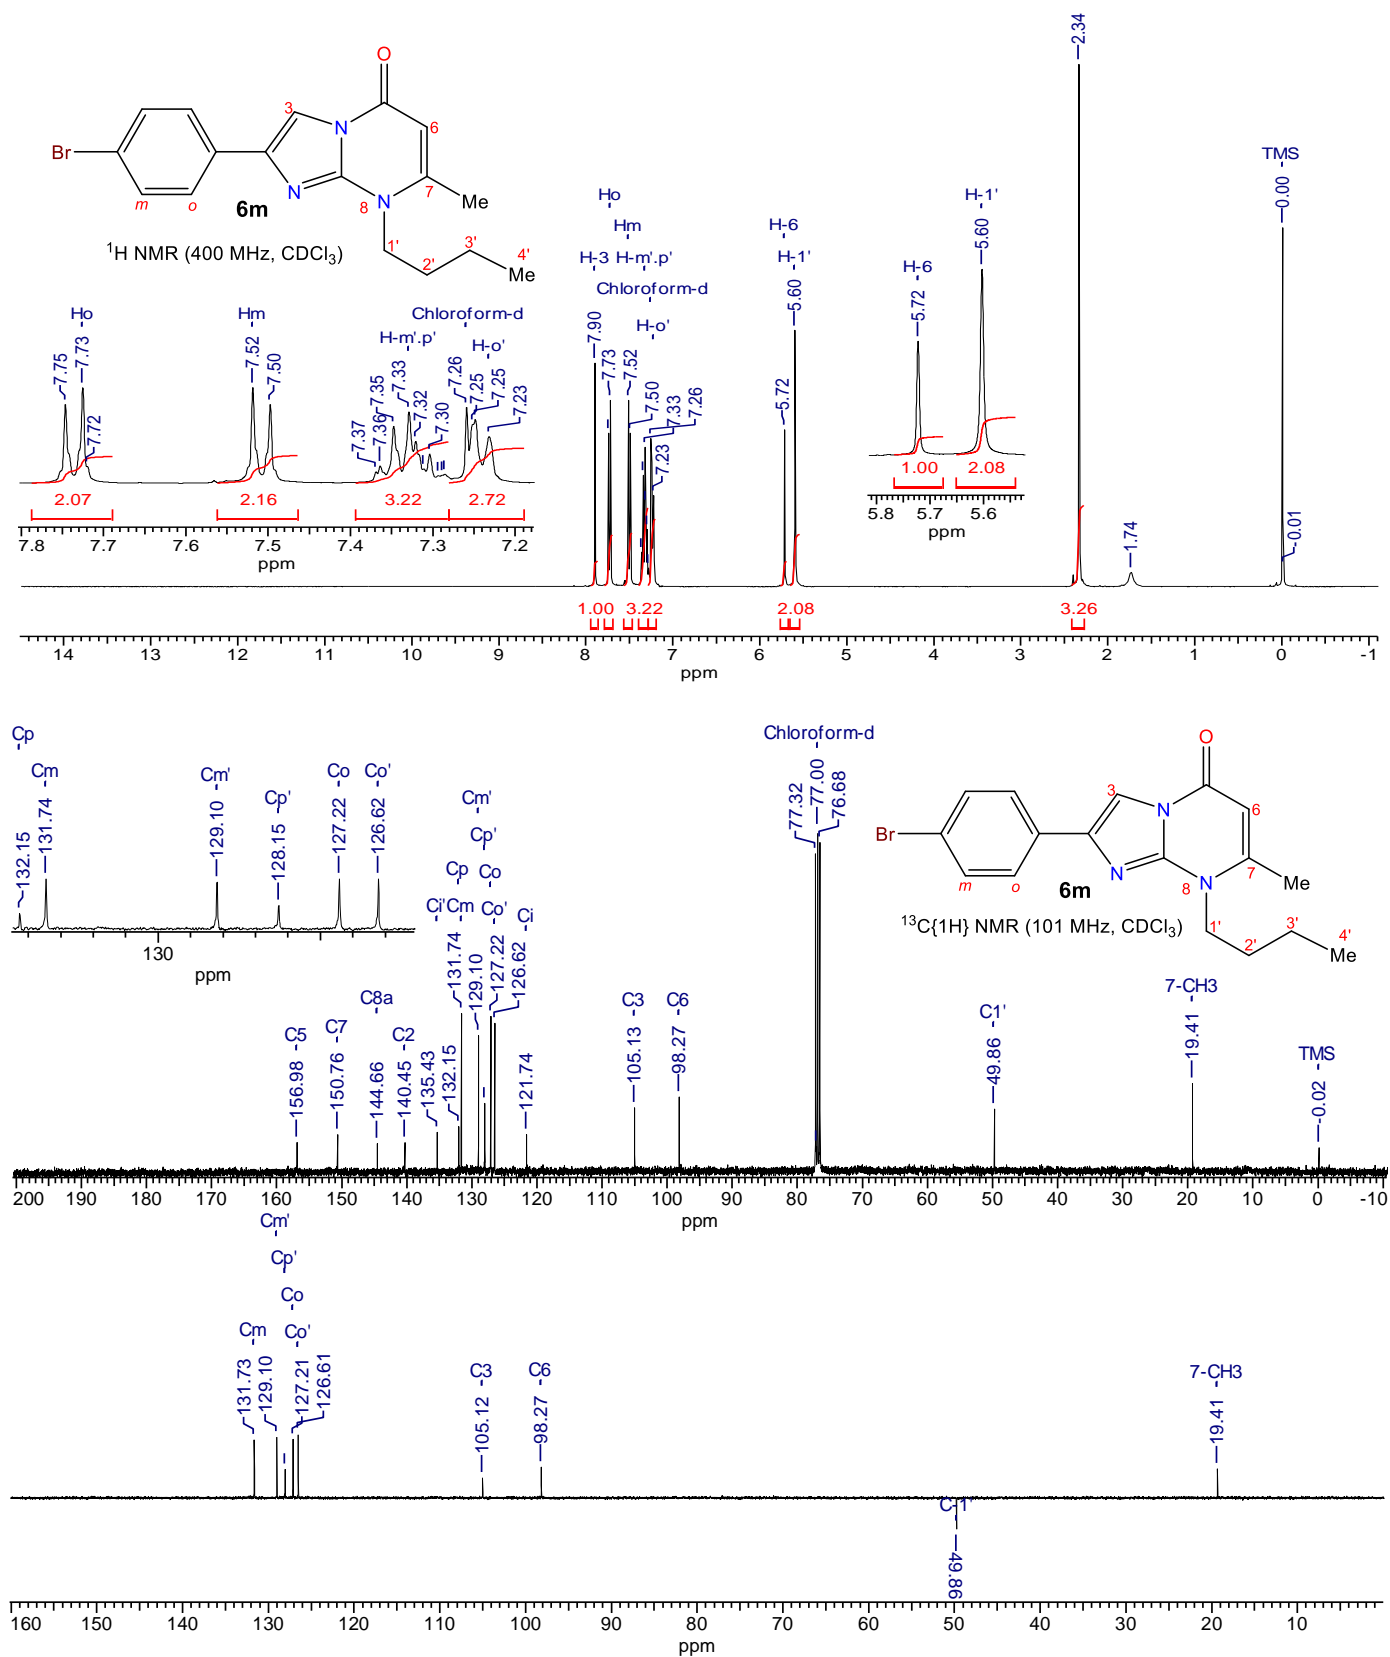





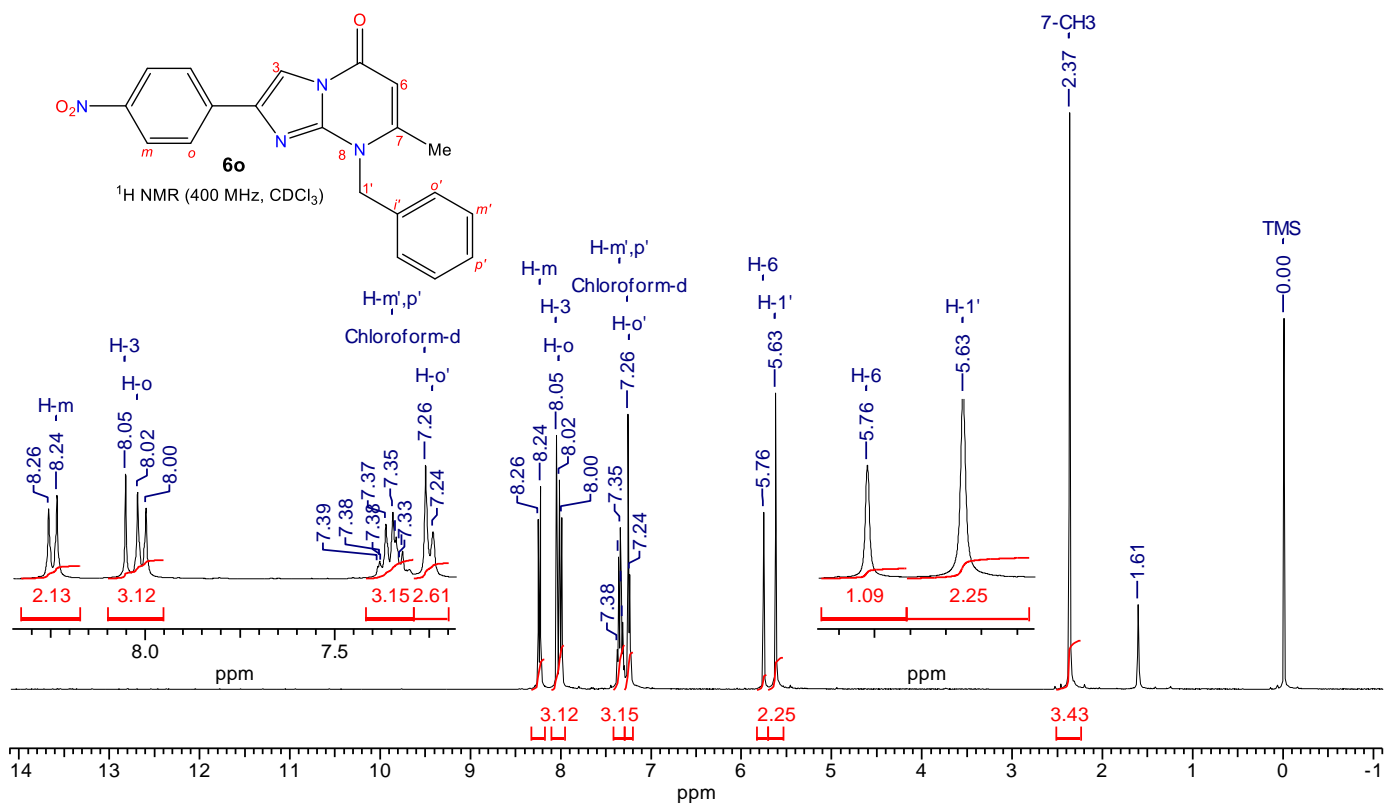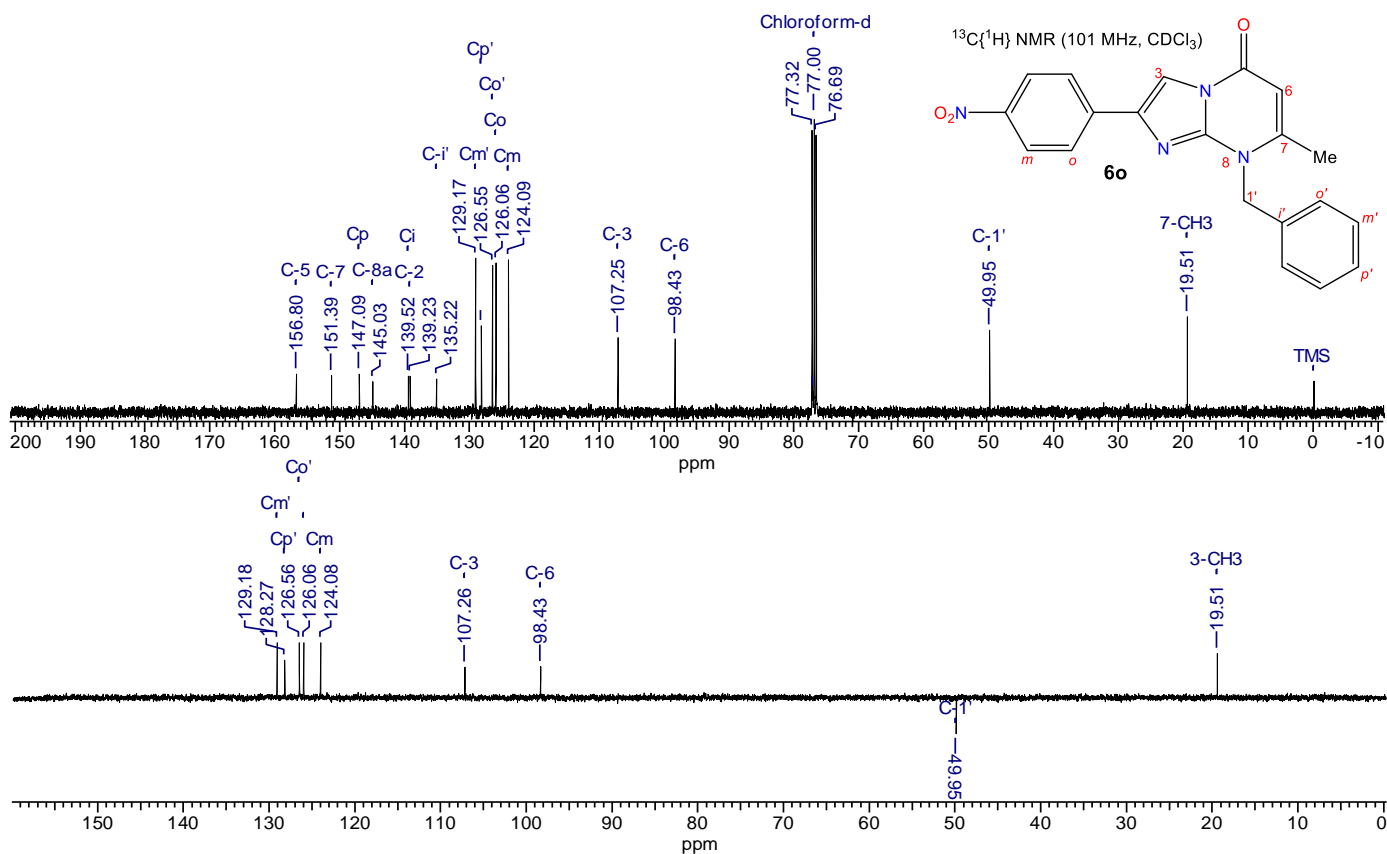

**Fig. S24** <sup>1</sup>H and <sup>13</sup>C{<sup>1</sup>H} NMR spectra of 8-benzyl-7-methyl-2-(4-nitrophenyl)imidazo[1,2-a]pyrimidin-5(8H)-one (**6o**)

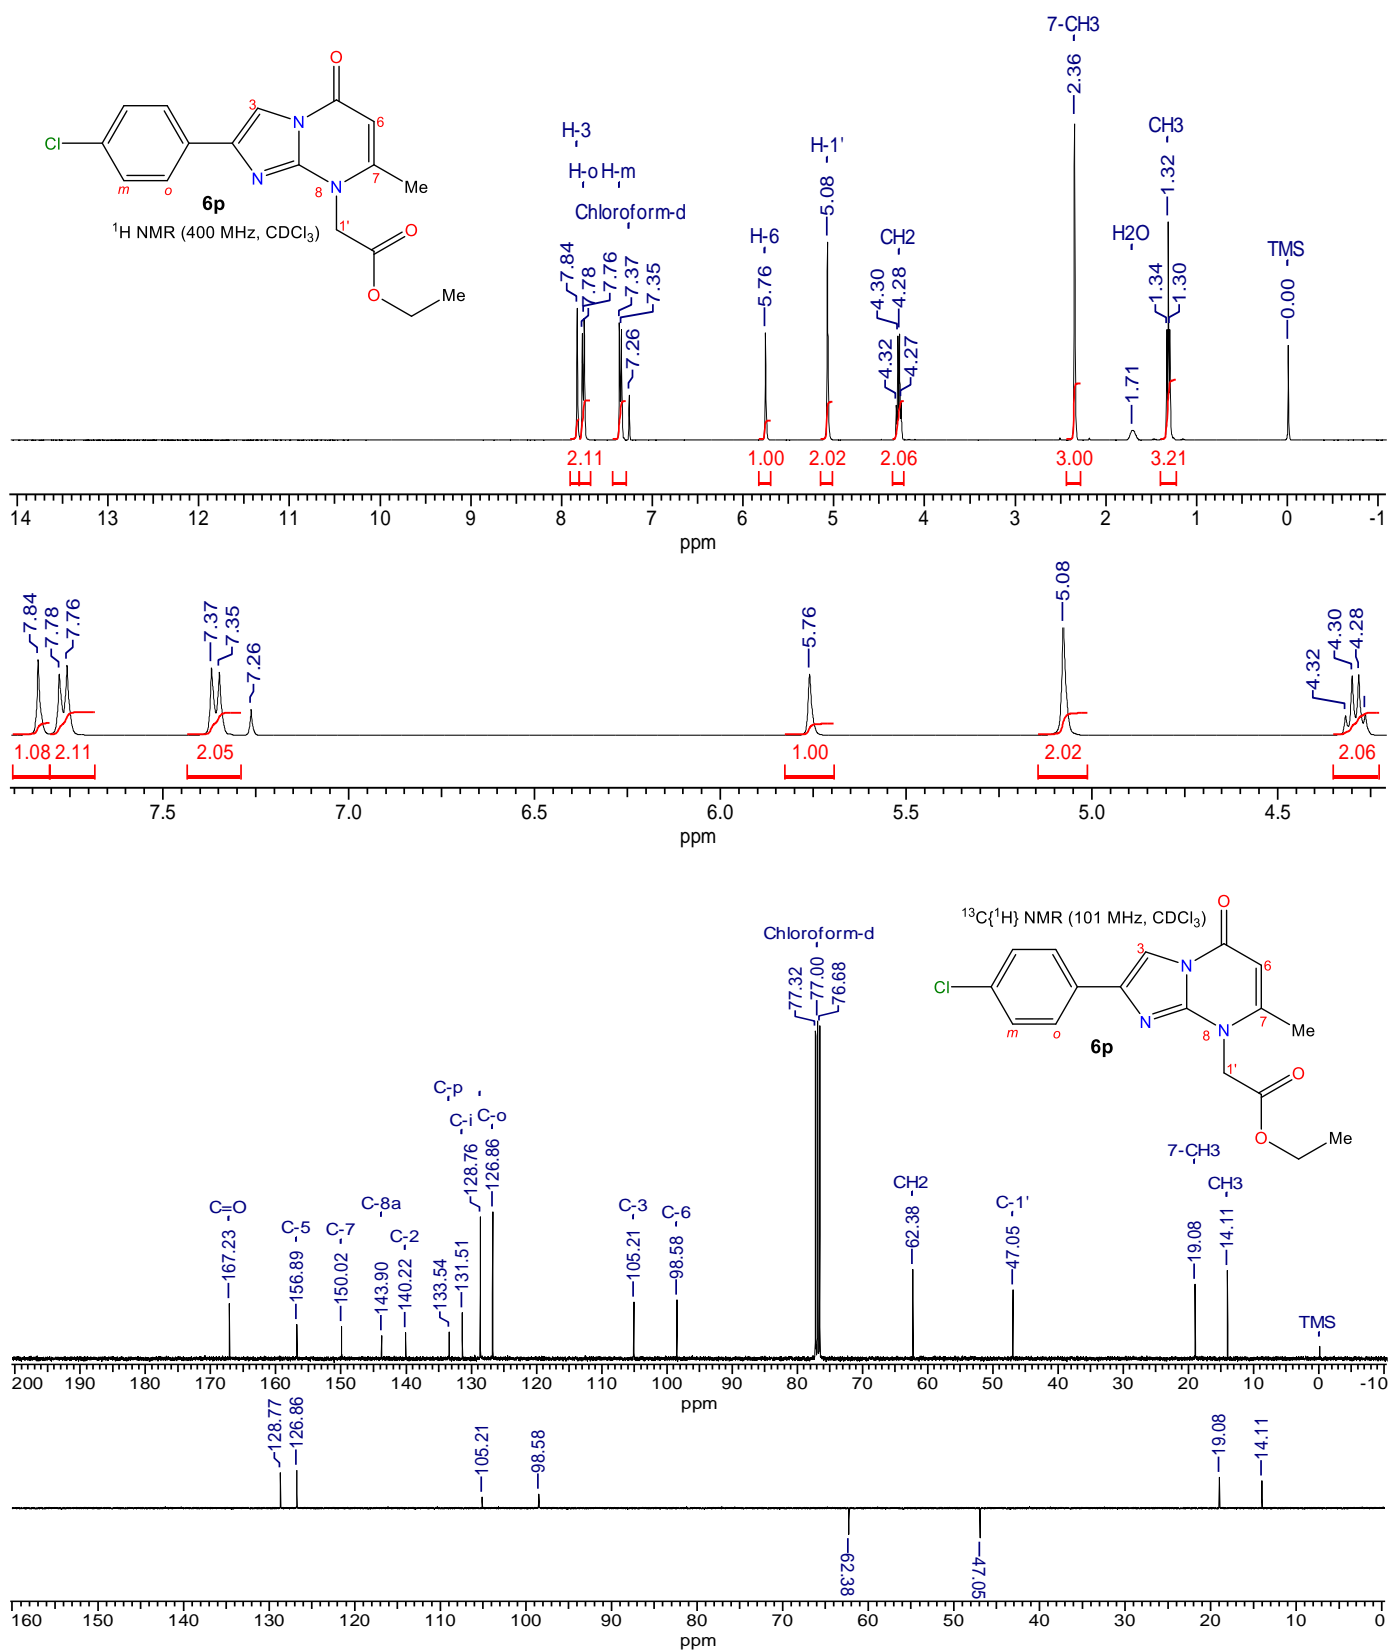

**Fig. S25** <sup>1</sup>H and <sup>13</sup>C{<sup>1</sup>H} NMR spectra of ethyl 2-(4-chlorophenyl)-7-methyl-5-oxoimidazo[1,2-*a*]pyrimidin-8(5H)-yl)acetate (**6p**)

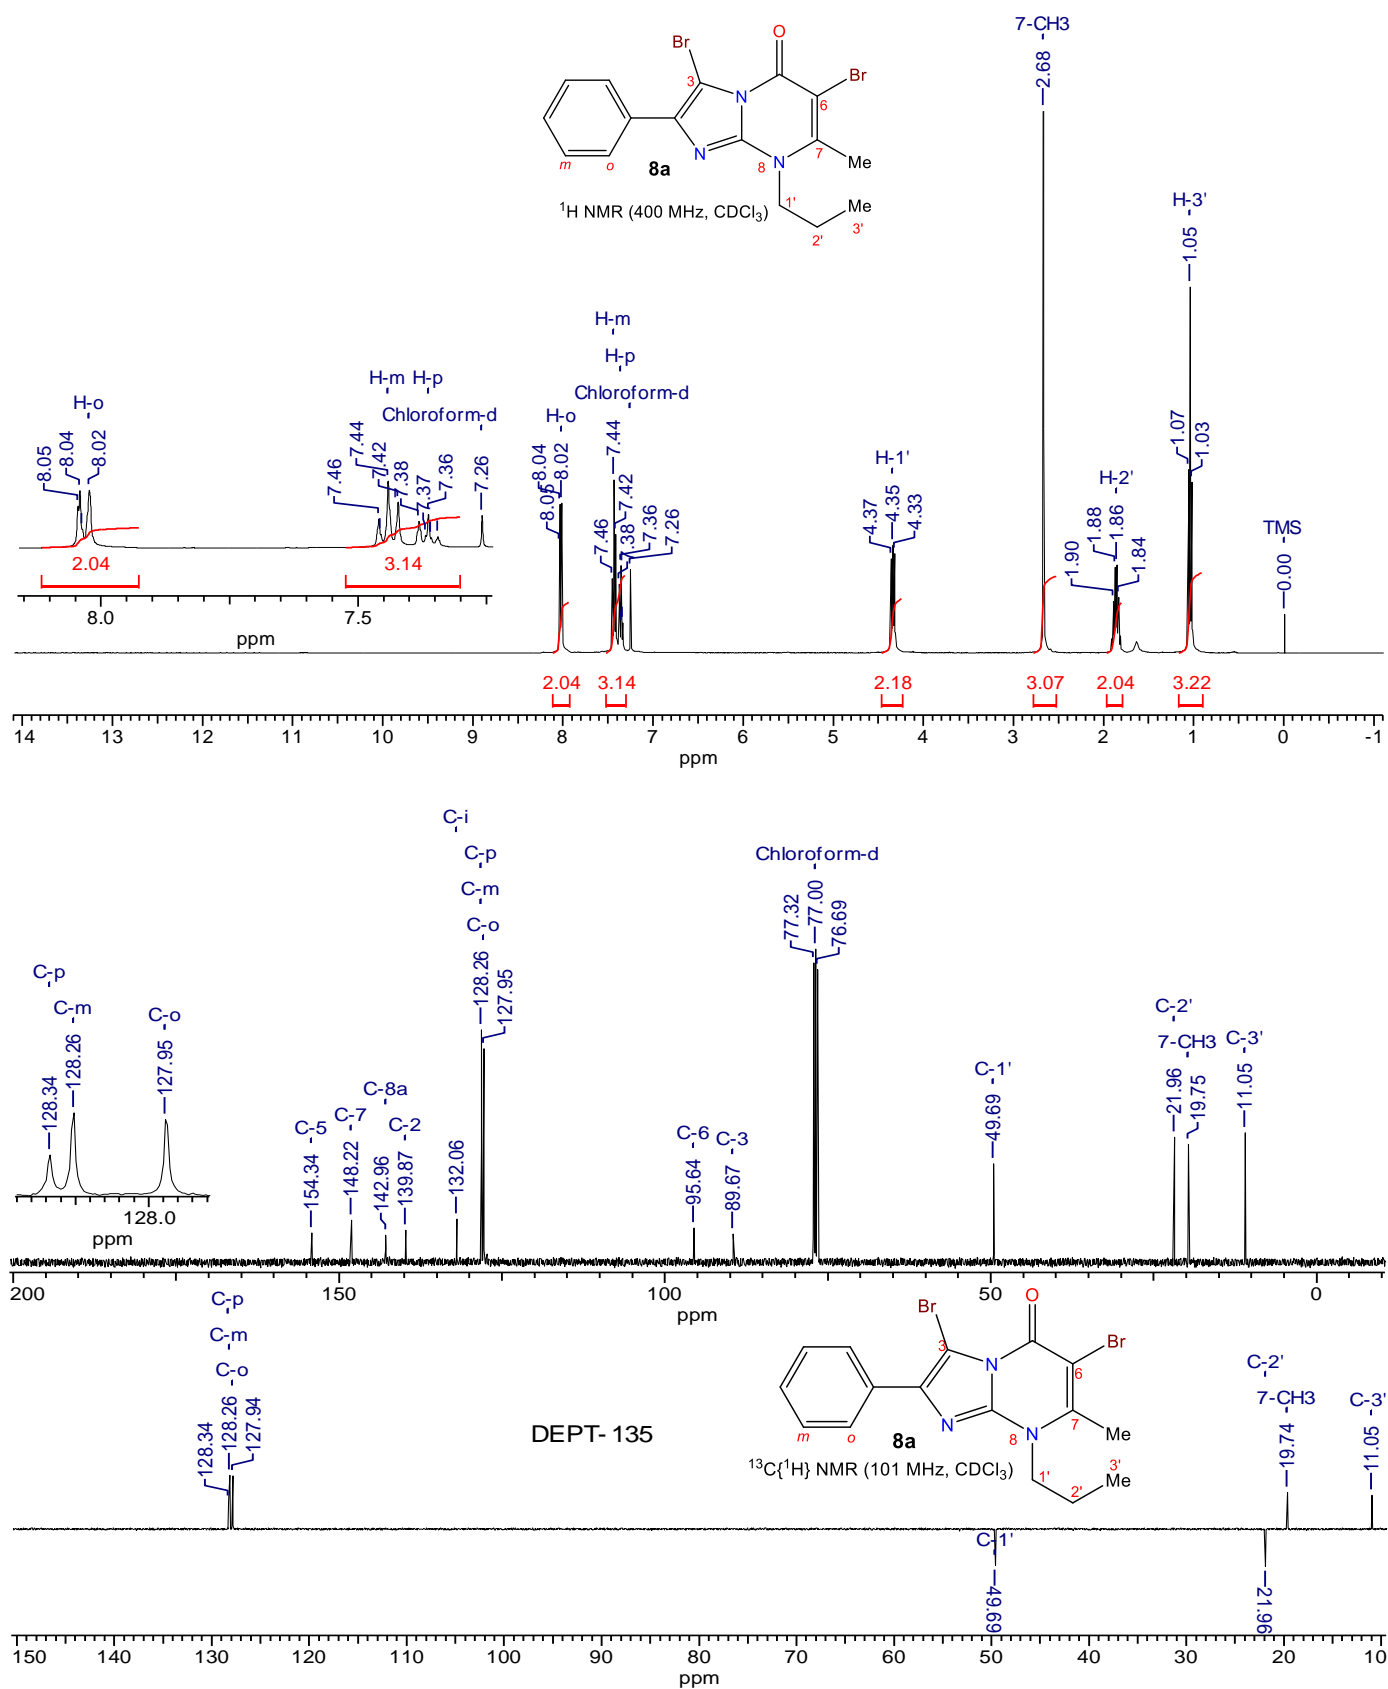

**Fig. S26** <sup>1</sup>H and <sup>13</sup>C{<sup>1</sup>H} NMR spectra of 3,6-dibromo-7-methyl-2-phenyl-8-propylimidazo[1,2-a]pyrimidin-5(8*H*)-one (**8a**)

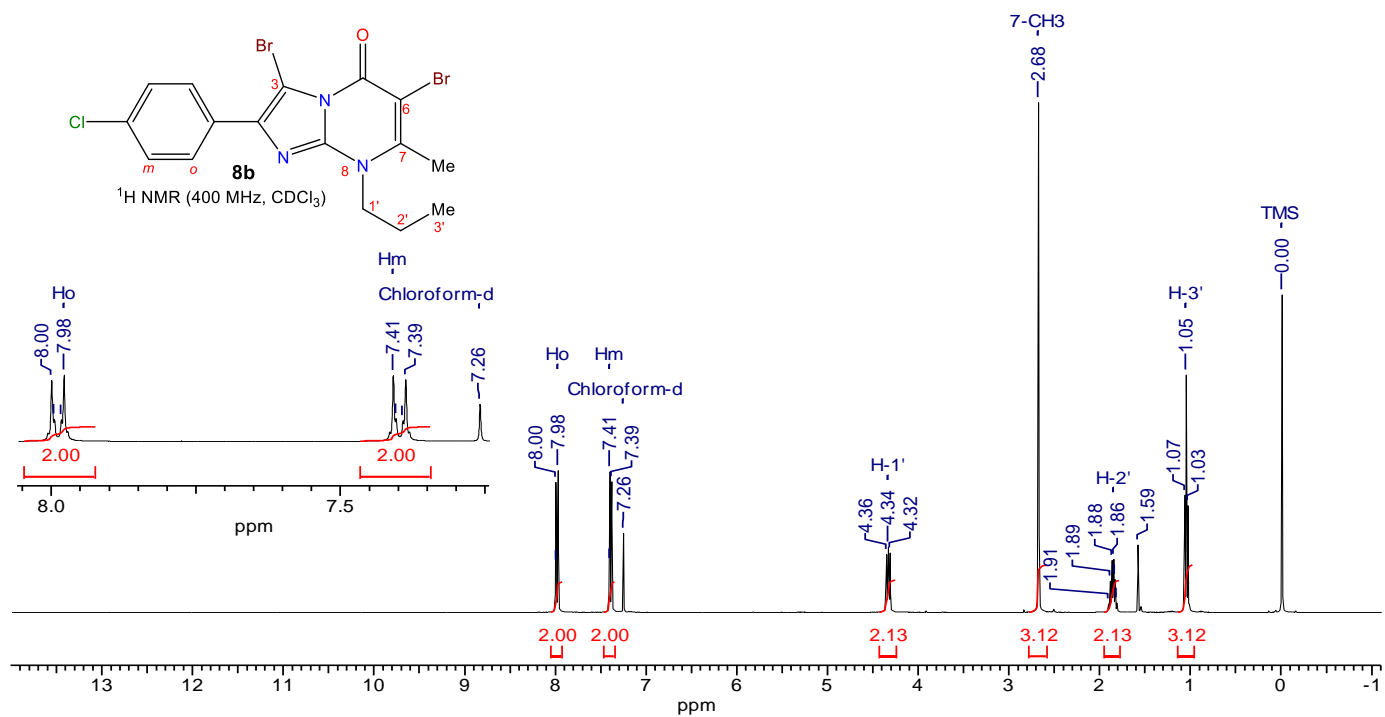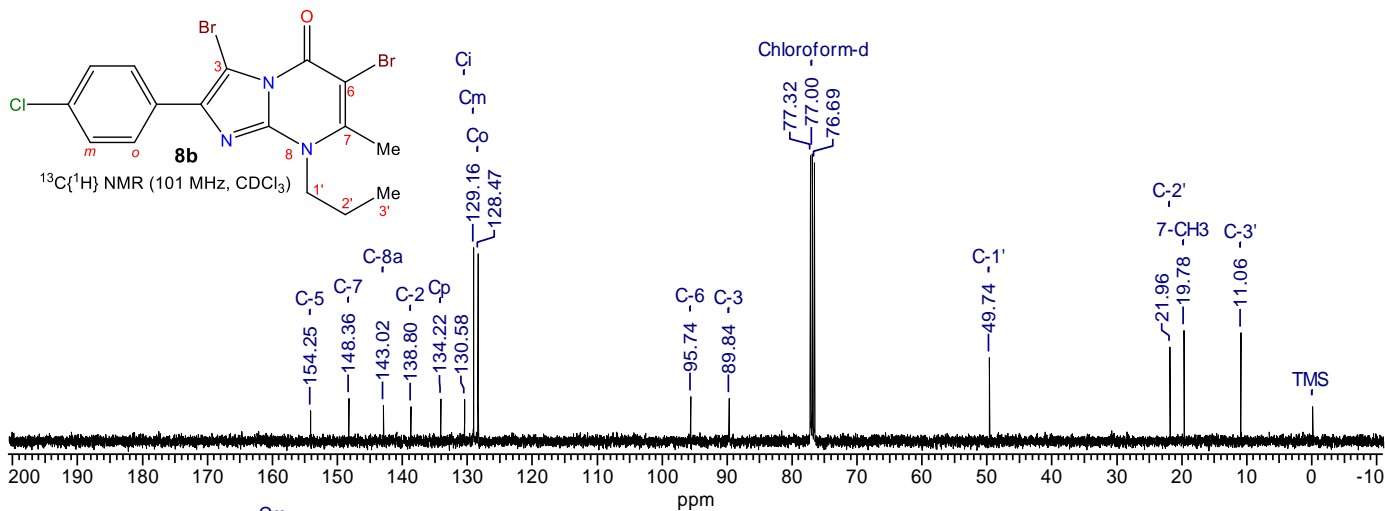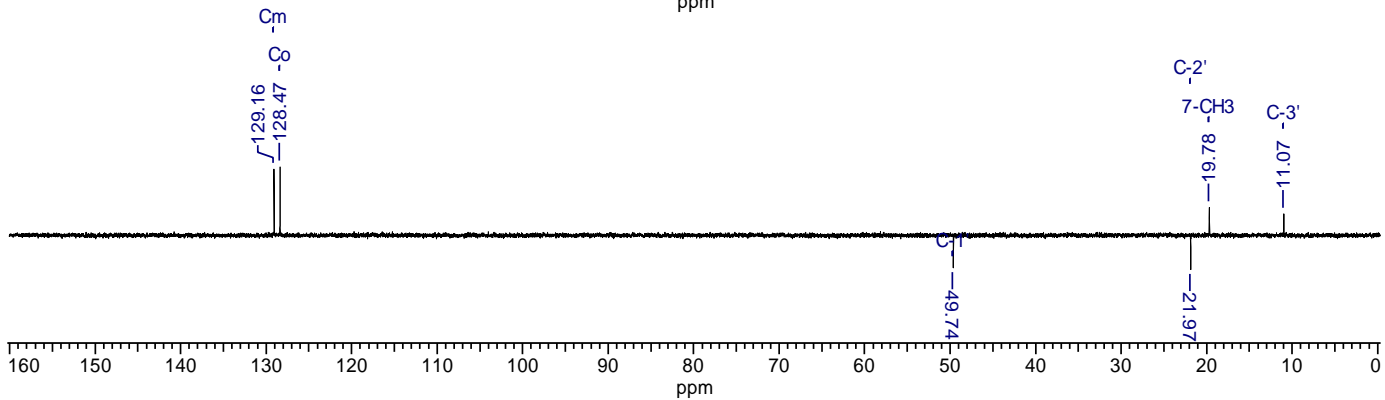

**Fig. S27** <sup>1</sup>H and <sup>13</sup>C{<sup>1</sup>H} NMR spectra of 3,6-dibromo-2-(4-chlorophenyl)-7-methyl-8-propylimidazo[1,2-*a*]pyrimidin-5(8*H*)-one (**8b**)

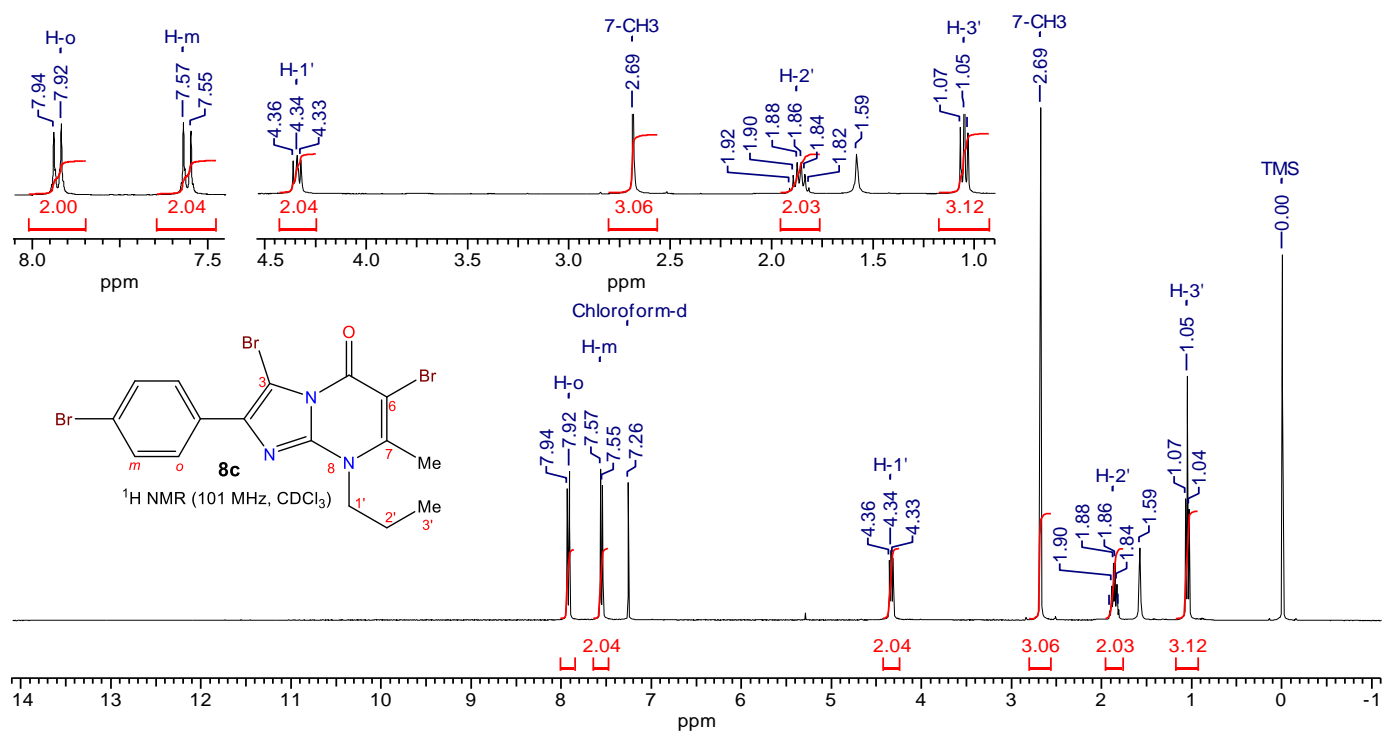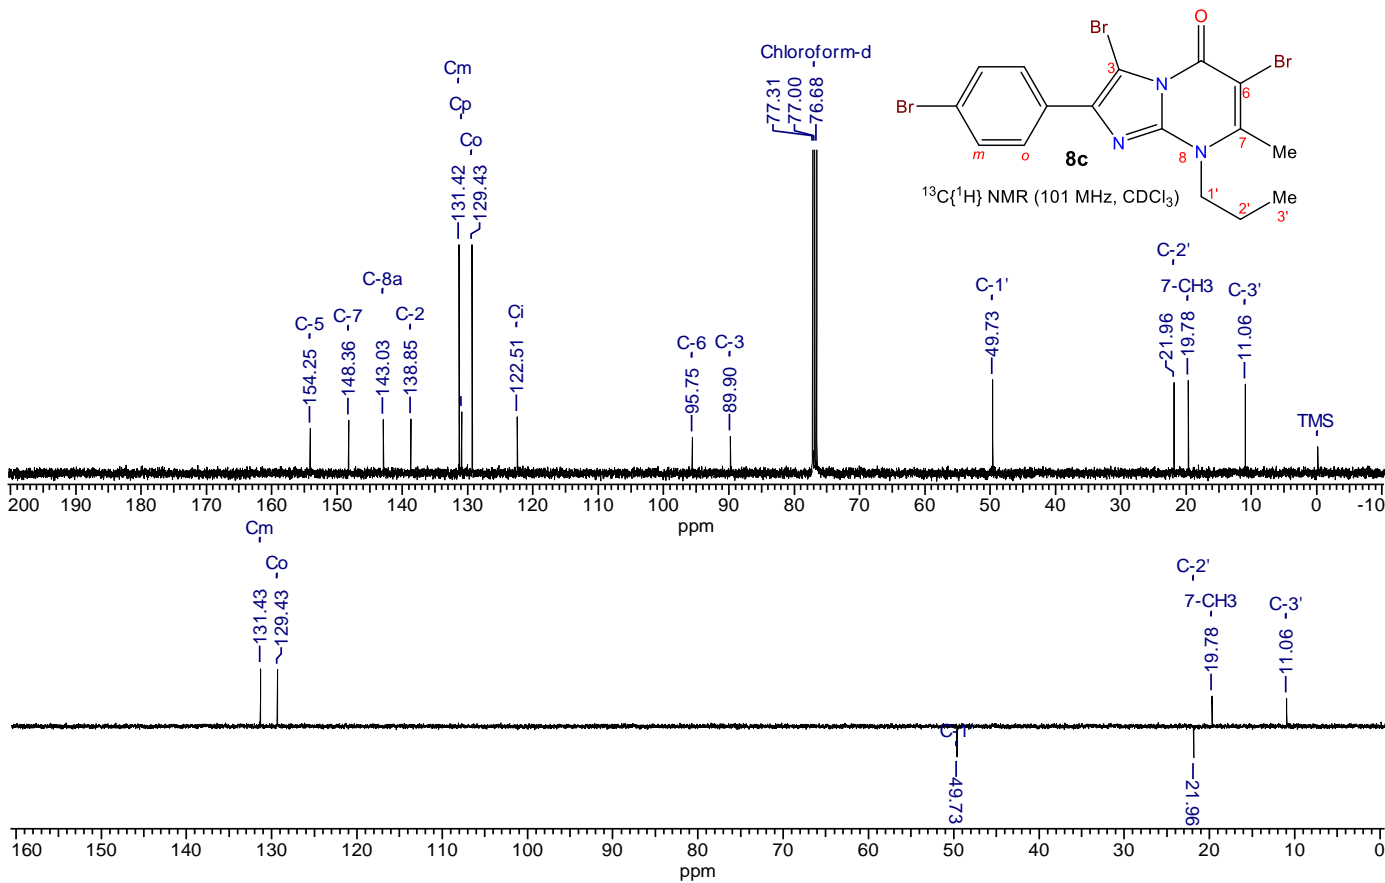

**Fig. S28** <sup>1</sup>H and <sup>13</sup>C{<sup>1</sup>H} NMR spectra of 3,6-dibromo-2-(4-bromophenyl)-7-methyl-8-propylimidazo[1,2-*a*]pyrimidin-5(8*H*)-one (**8c**)

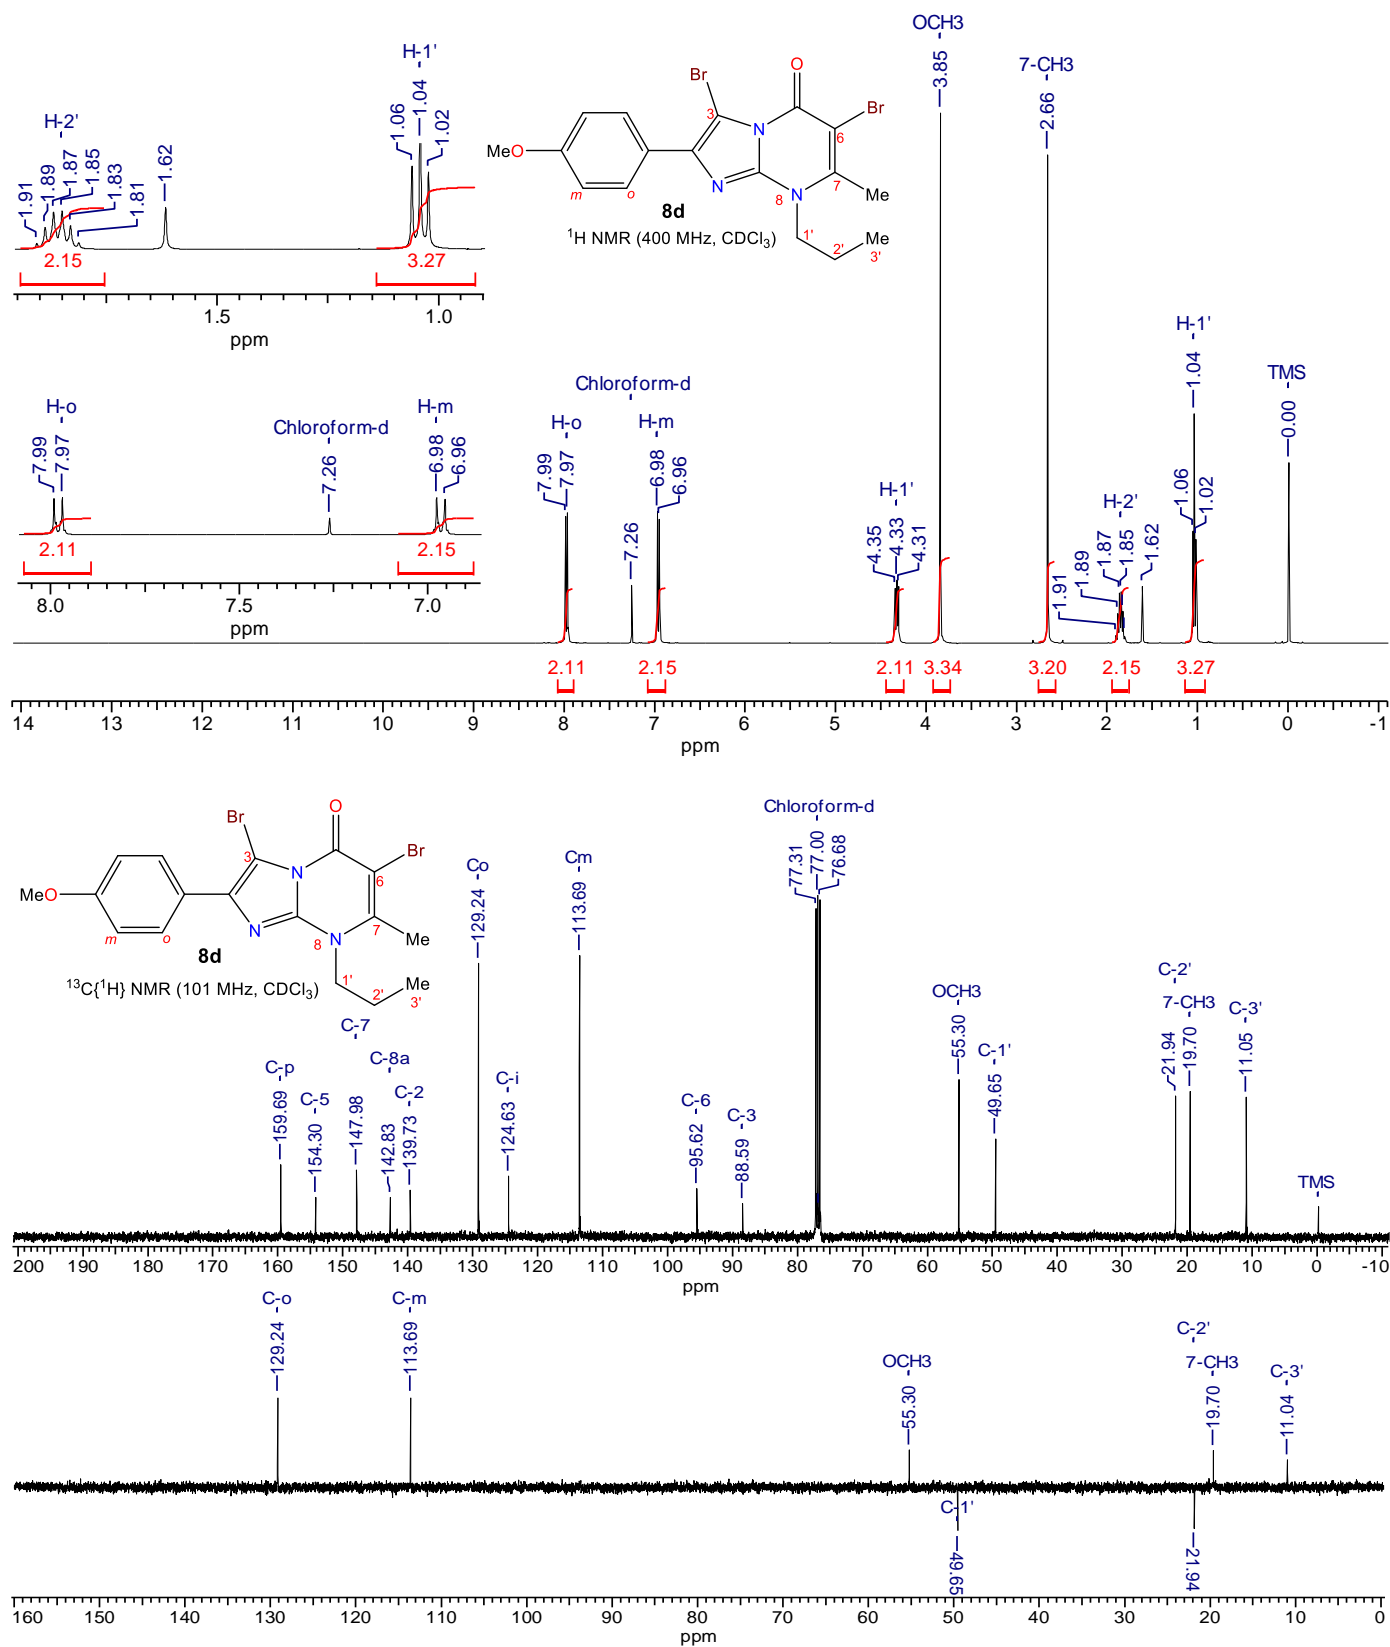

**Fig. S29**  $^1\text{H}$  and  $^{13}\text{C}\{^1\text{H}\}$  NMR spectra of 3,6-dibromo-2-(4-methoxyphenyl)-7-methyl-8-propylimidazo[1,2-*a*]pyrimidin-5(8*H*)-one (**8d**)

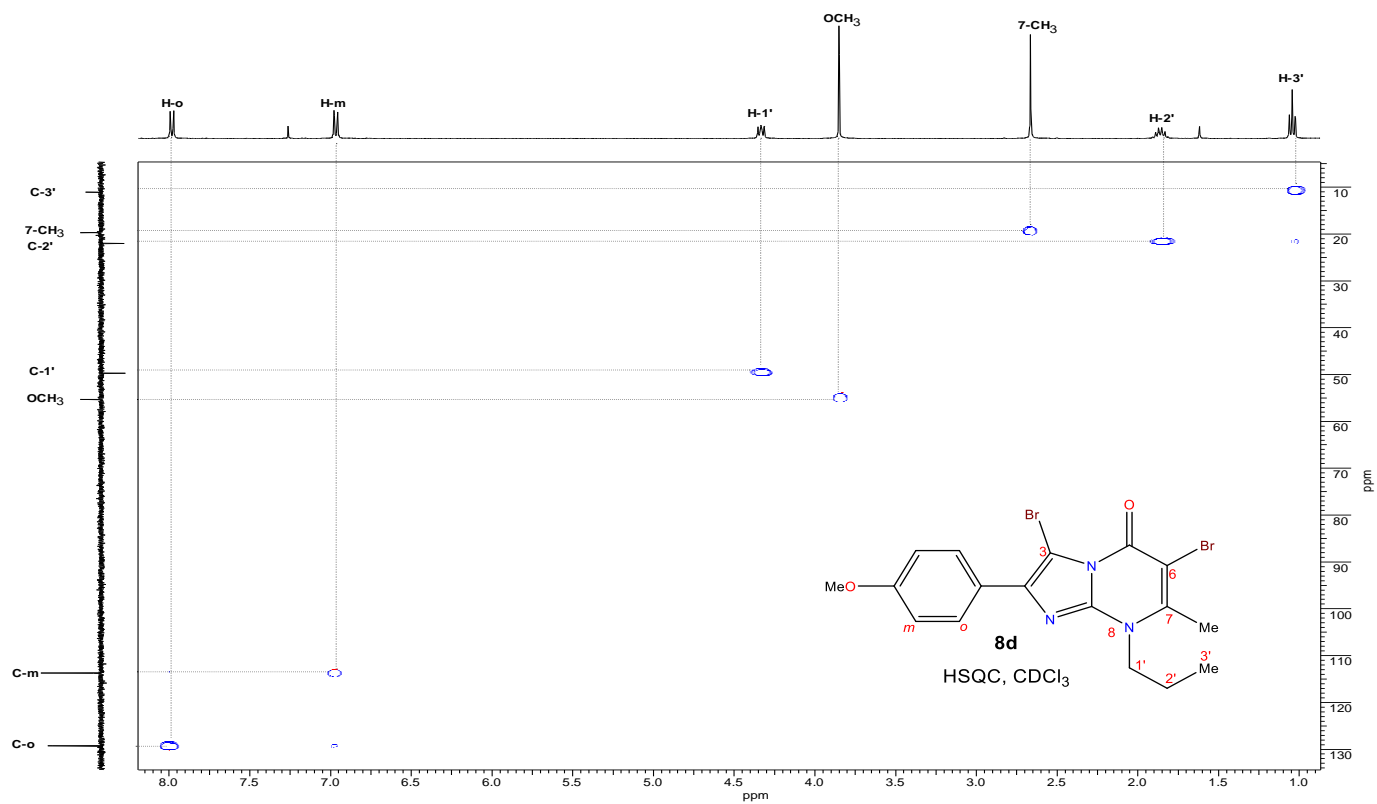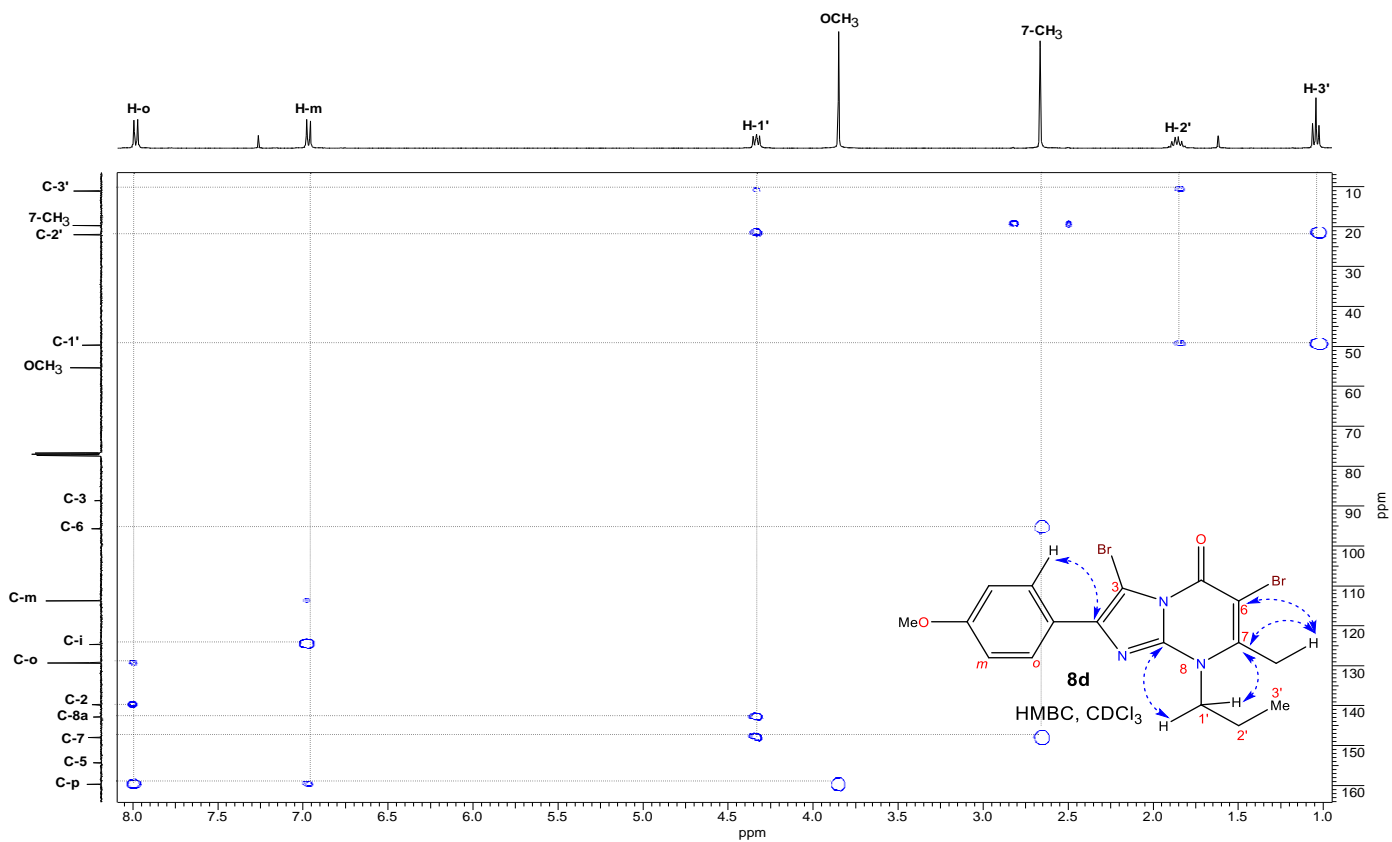

Fig. S30 HSQC and HMBC spectra of 3,6-dibrominated compound **8d**

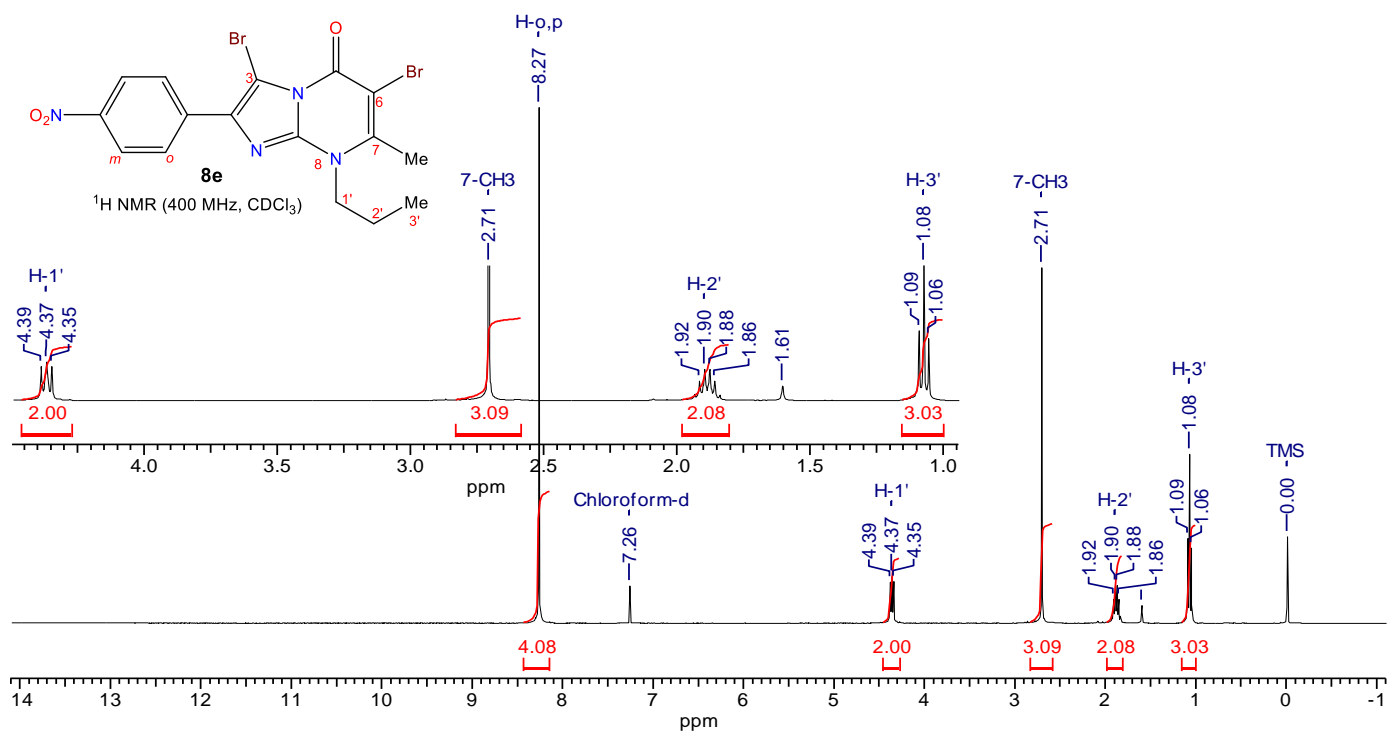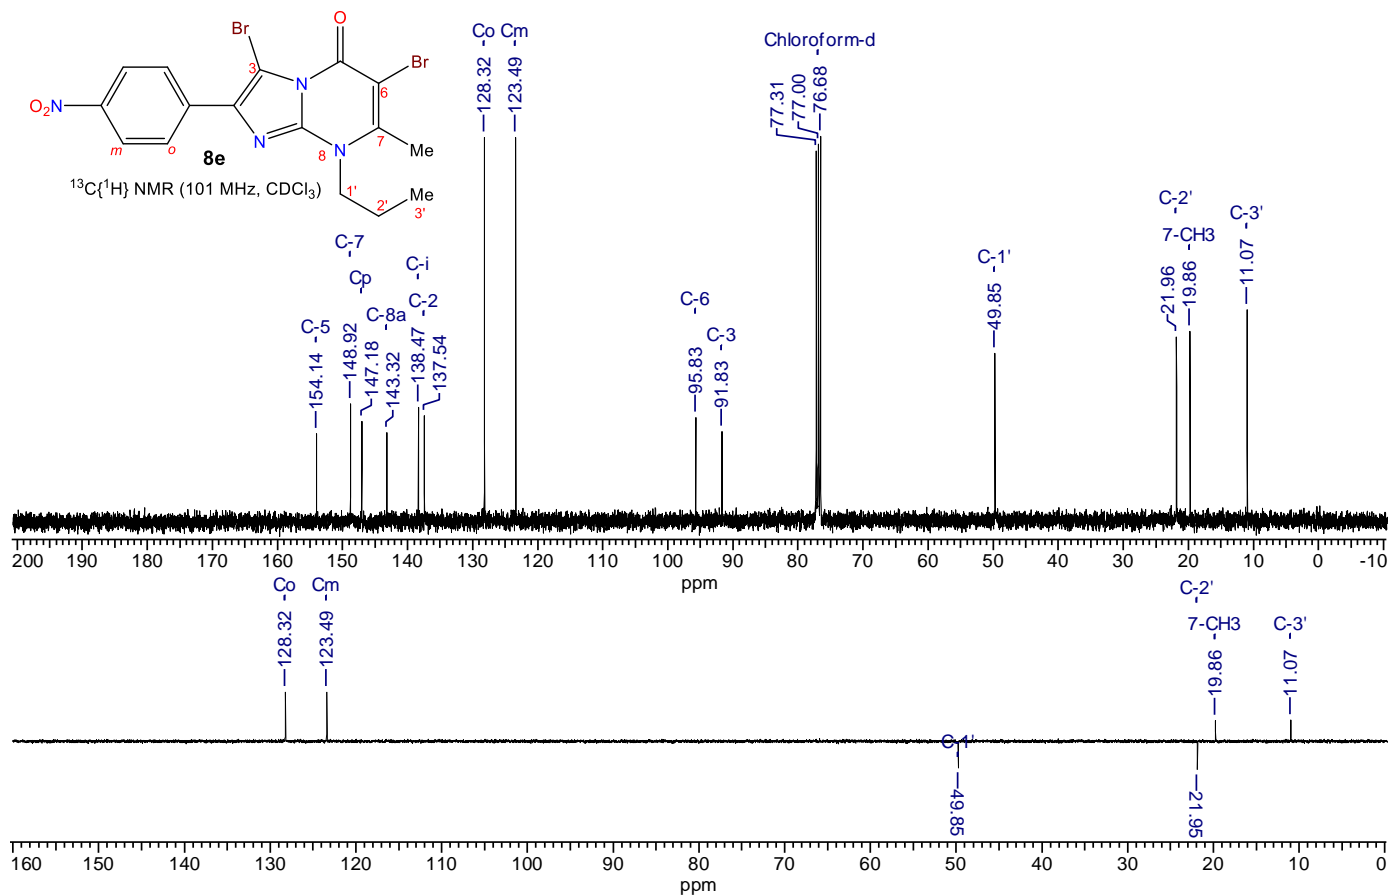

**Fig. S31** <sup>1</sup>H and <sup>13</sup>C{<sup>1</sup>H} NMR spectra of 3,6-dibromo-7-methyl-2-(4-nitrophenyl)-8-propylimidazo[1,2-*a*]pyrimidin-5(8*H*)-one (**8e**)

**S40**



## 4. Photophysical and crystallographic details

UV-vis absorption and fluorescence studies of compound **6i** were carried out at 20 °C using solutions 6.6 μM in cyclohexene (CH), *tert*-butyl methyl ether (TBME), dichloromethane (DCM), ethyl acetate (AcOEt), *N,N*-dimethylformamide (DMF), and acetonitrile (ACN). The relative quantum yields ( $\phi_F$ ) were obtained using Prodan ( $\phi_F = 0.94$  in ACN) as a reference and calculated according to Equation 1

$$\phi_{f,x} = \phi_{f,st} \frac{F_x A_{st} n_x^2}{F_{st} A_x n_{st}^2} \quad \text{Equation 1}$$

where *x* and *st* indicate the sample and standard solution, respectively, *F* is the integral photon flux, *A* is the absorption factor, and *n* is the refractive index of the solvent.<sup>8</sup>

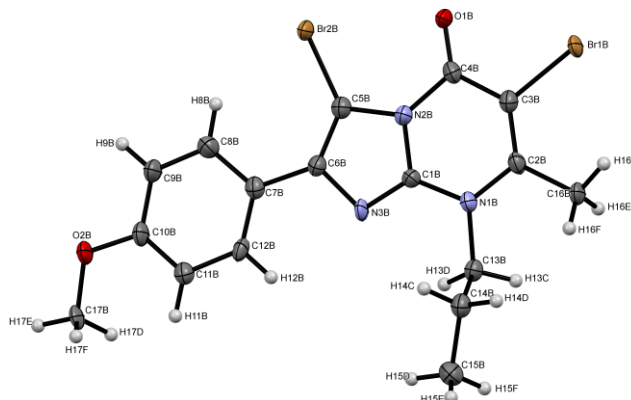

**Fig. S32** ORTEP drawing for structure **8d**. Displacement ellipsoids are drawn at the 50% probability level.

## 5. References

- 1 G. M. Sheldrick, *Acta Crystallogr C Struct Chem*, 2015, **71**, 3–8.
- 2 N. R. Elejalde, M. Macías, J. C. Castillo, M. Sortino, L. Svetaz, S. Zacchino and J. Portilla, *ChemistrySelect*, 2018, **3**, 5220–5227.
- 3 M. Jyothi, H. A. Khamees, S. M. Patil, R. Ramu and S. A. Khanum, *Journal of the Iranian Chemical Society*, 2022, **19**, 3919–3933.
- 4 A. M. Kamal El-sagheir, I. Abdelmesseeh Nekhala, M. K. Abd El-Gaber, A. S. Aboraia, J. Persson, A.-B. Schäfer, M. Wenzel and F. A. Omar, *RSC Med Chem*, 2023, **14**, 2593–2610.
- 5 S. Laneri, A. Sacchi and E. Abignente, *J Heterocycl Chem*, 2000, **37**, 1265–1267.
- 6 H. T. Abdel-Mohsen, A. Abood, K. J. Flanagan, A. Meindl, M. O. Senge and H. I. El Diwani, *Arch Pharm (Weinheim)*, 2020, **353**, e1900271.
- 7 M. Kawaguchi, T. Okabe, S. Okudaira, K. Hama, K. Kano, H. Nishimasu, H. Nakagawa, R. Ishitani, H. Kojima, O. Nureki, J. Aoki and T. Nagano, *J Med Chem*, 2020, **63**, 3188–3204.
- 8 C. Würth, M. Grabolle, J. Pauli, M. Spieles and U. Resch-Genger, *Nat. Protoc.*, 2013, **8**, 1535–1550.
